# Supplementary material for: A conserved cell division protein directly regulates FtsZ dynamics in filamentous and unicellular actinobacteria
Source: eLife. 2021 Mar 17;10:e63387. doi: 10.7554/eLife.63387 (PMC7968930; doi:10.7554/eLife.63387)
Supplement: Figure 1—figure supplement 2—source data 1. [file elife-63387-fig1-figsupp2-data1.xlsx]

## Sheet: spores
Spore length measurements (biological triplicate experiments)
WT [mm]	WT [mm]	WT [mm]		SV56 [mm]	SV56 [mm]	SV56 [mm]		MB747 [mm]	MB747 [mm]	MB747 [mm]
3	1.066	1.602		1.367	1.848	0.945		0.96	1.038	1.129
1.153	1.344	1.081		1.142	1.65	2.476		0.906	1.472	1.237
0.88	1.17	1.008		2.18	1.163	1.565		1.161	1.28	1.224
1.094	1.323	1.216		3.151	1.129	1.654		1.317	1.246	1.282
2.03	1.241	1.036		1.247	0.939	1.267		1.124	1.093	1.125
0.993	1.999	1.244		2.202	1.009	1.391		0.837	1.416	1.025
1.045	1.301	1.327		1.638	1.422	2.835		0.76	1.138	1.172
0.975	1.063	1.002		1.559	1.367	1.315		0.902	1.352	1.138
1.05	1.243	1.177		1.577	1.134	1.763		0.98	1.288	1.11
1.266	1.018	1.011		1.699	1.115	0.998		1.193	1.092	1.267
1.082	1.356	1.314		0.921	1.24	1.483		0.977	1.356	1.308
1.274	1.569	1.41		1.563	1.724	1.281		1.297	1.053	1.159
2.874	0.931	1.323		1.601	1.523	1.494		1.45	1.126	1.433
1.103	1.694	1.647		0.96	0.996	1.368		1.11	1.192	1.174
1.115	1.111	1.218		1.076	1.132	1.002		1.276	1.269	1.038
1.082	1.417	1.429		1.419	1.436	1.105		1.614	1.101	1.359
1.076	1.037	1.203		1.943	1.196	1.362		0.986	1.383	1.083
0.993	1.439	1.155		2.374	1.341	1.129		1.102	1.171	0.985
1.154	1.239	1.308		1.37	1.065	1.35		1.113	1.264	1.74
1.1	1.059	1.106		1.482	1.505	1.138		0.885	1.118	1.105
0.766	1.037	1.227		1.389	1.322	1.606		1.044	1.313	1.103
1.228	1.058	1.079		1.259	1.044	1.863		1.017	1.025	1.01
1.594	1.274	0.974		1.61	1.853	1.55		1.431	1.199	1.381
1.641	1.138	1.758		0.949	1.787	1.073		0.868	1.063	1.085
1.056	1.241	1.801		1.223	1.137	1.029		0.91	1.06	1.145
0.797	1.189	1.346		1.217	1.105	1.301		1.008	1.167	1.07
1.92	1.02	1.159		1.313	1.441	0.978		1.073	1.254	1.042
1.156	1.498	1.158		1.28	1.268	1.368		1.001	1.237	1
1.272	1.219	1.184		1.472	1.26	1.047		1.2	1.388	1.054
1.286	1.275	1.869		1.248	1.938	1.166		1.03	1.081	0.748
1.453	1.183	1.237		1.866	1.002	1.311		0.785	1.345	1.289
1.128	1.161	1.547		1.954	1.528	0.982		0.984	1.345	1.416
1.442	1.292	1.12		1.313	1.26	1.49		1.473	1.51	1.045
1.07	1.037	1.225		1.04	1.638	0.874		3.232	0.857	1.042
1.295	1.058	1.571		1.16	0.975	1.033		1.032	1.099	1.111
1.187	1.274	2.321		1.548	0.981	1.187		2.091	1.299	0.916
1.091	1.138	1.668		1.523	0.862	1.133		1.025	1.546	0.939
2.289	1.241	1.164		1.29	1.927	1.422		1.103	1.158	1.167
0.858	1.189	1.19		0.978	1.452	1.855		1.119	1.363	1.349
1.065	1.02	1.478		2.477	1.754	1.009		1.016	0.908	1.251
1.509	1.498	2.013		2.548	1.308	0.949		0.976	1.186	1.138
0.96	1.219	1.276		0.944	1.073	1.382		1.406	1.345	0.963
1.193	1.275	1.316		0.796	1.124	1.122		1.142	1.269	1.134
1.265	1.183	1.301		1.33	1.15	1.568		1.257	0.8	1.337
1.198	1.161	1.167		1.532	1.302	1.453		0.853	1.092	1.199
1.453	1.292	1.849		1.471	1.059	1.817		0.829	1.598	1.04
1.36	1.175	1.066		1.363	1.192	1.499		1.099	1.236	1.4
0.872	1.215	1.407		1.094	1.533	1.016		1.192	1.079	1.196
1.012	1.195	1.248		1.195	1.022	1.769		1.153	1.245	1.347
0.729	1.052	1.394		1.341	0.996	1.598		0.743	1.138	1.319
1.117	1.145	1.291		1.354	0.978	1.226		1.657	1.041	1.232
1.067	1.348	1.375		1.126	1.288	1.458		1.289	1.138	1.337
1.472	0.869	1.165		1.349	1.268	1.217		0.986	1.103	1.053
1.126	1.096	1.173		1.533	1.24	1.194		1.486	1.16	1.2
1.187	1.793	1.209		1.008	1.602	1.167		1.241	1.327	1.111
1.254	0.975	1.255		1.411	1.737	1.114		0.93	1.234	1.206
1.091	1.155	1.052		1.24	1.579	1.208		1.199	1.14	1.16
1.357	1.077	1.153		1.748	1.301	1.136		1.232	1.057	1.157
2.135	1.247	0.968		1.23	1.952	1.135		1.369	1.02	1.348
1.194	1.341	1.416		1.017	1.45	1.273		0.978	1.085	1.223
1.129	1.29	1.105		1.335	0.804	1.188		1.102	0.969	1.086
1.04	1.044	1.206		1.411	1.21	1.056		1.274	1.116	1.302
1.421	1.239	1.174		1.394	0.964	1.532		1.093	1.741	1.368
0.944	1.086	0.983		1.914	1.156	1.252		1.368	1.089	1.303
1.16	1.203	2.271		1.322	3.314	1.239		1.565	1.39	1.63
1.081	1.138	1.231		1.318	1.072	2.021		1.094	1.201	1.147
1.067	1.134	1.438		1.183	1.464	1.728		1.027	1.341	1.185
1.125	1.801	1.329		1.126	1.35	1.159		1.161	1.06	1.318
0.964	1.35	1.256		1.592	1.523	1.141		0.98	1.366	1.37
0.949	1.342	1.151		1.744	1.53	1.167		1.013	1.036	1.062
0.956	1.389	1.267		1.148	1.179	1.766		1.134	1.073	1.29
1.119	1.589	1.295		0.881	0.989	1.035		1.378	1.04	1.271
1.026	1.327	1.191		1.148	1.958	1.105		1.15	1.274	1.161
1.151	1.062	1.195		1.092	1.711	1.609		1.054	1.172	1.381
1.134	1.073	1.276		1.394	1.444	1.314		1.296	1.521	1.063
1.149	1.186	1.057		1.363	1.824	1.017		0.945	1.261	1.248
1.117	1.152	1.235		1.303	1.1	1.038		1.421	1.168	1.211
1.187	1.229	0.989		1.365	0.997	1.165		1.073	1.39	1.246
1.048	1.528	1.2		0.861	1.041	1.345		1.001	1.188	1.314
1.113	1.047	1.481		1.046	1.993	1.672		1	1.012	1.402
1.18	1.05	1.161		1.844	1.685	1.272		1.14	1.11	1.068
1.031	1.15	1.274		1.066	1.488	1.517		1.914	1.418	1.052
1.138	0.934	1.133		1.397	1.522	1.138		1.258	1.304	1.274
0.88	0.905	1.804		1.78	1.502	1.476		1.228	1.102	0.859
1.03	0.904	1.369		1.005	1.705	2.227		1.106	1.702	1.235
1.115	1.342	1.425		1.468	0.977	1.704		1.619	1.829	1.079
1.021	1.4	1.178		1.713	1.954	1.803		0.929	1.23	1.228
1.051	1.007	1.236		1.352	1.745	1.336		0.82	1.114	1.267
1.252	1.063	1.166		1.303	1.263	0.981		2.783	1.178	1.301
0.991	1.098	1.034		1.416	1.179	1.415		1.11	1.158	1.263
1.045	1.24	1.102		1.211	1.878	1.213		1.014	1.201	1.143
1.696	1.192	2.155		1.295	1.105	1.95		1.064	1.382	1.157
1.151	1.275	1.251		0.947	1.691	1.484		1.015	1.437	0.909
1.28	1.276	1.399		1.055	1.49	1.49		1.276	1.2	1.25
1.565	1.124	1.16		1.609	1.54	1.094		0.849	1.183	1.231
1.025	1.738	1.961		1.175	1.495	1.877		1.015	1.028	1.133
1.119	1.153	1.121		1.402	1.207	1.813		0.88	1.232	1.077
1.139	1.496	1.314		1.263	1.839	1.302		1.085	1.186	1.311
1.145	1.363	1.156		1.798	1.748	1.085		1.069	1.194	1.301
1.145	1.285	1.293		2.223	2.031	1.014		0.918	1.193	1.357
0.957	0.975	1.372		1.134	1.112	1.404		0.935	1.186	1.29
1.19	1.241	1.351		1.414	1.248	1.757		1.186	1.184	1.314
1.208	1.358	1.403		2.017	1.352	3.202		1.169	1.291	1.202
0.947	1.46	0.853		1.512	2.479	1.269		1.018	1.545	1.145
0.903	1.31	1.318		1.103	2.037	0.936		0.872	1.199	1.263
1.268	1.461	1.201		1.453	1.471	1.306		0.995	1.111	1.488
1.383	1.138	1.111		0.935	1.348	1.55		0.971	1.187	1.173
1.243	1.102	1.109		1.626	1.367	1.037		1.597	1.202	1.337
1.121	1.305	1.06		0.869	1.144	1.352		1.132	1.349	1.242
1.259	1.146	1.128		1.211	1.939	1.441		1.132	1.202	1.261
1.233	1.055	1.09		1.015	1.366	1.2		1.35	1.246	1.268
1.313	1.386	1.423		1.435	1.021	1.477		1.193	1.411	0.955
1.271	1.266	1.354		1.249	1.126	1.401		1.238	1.232	1.463
1.263	1.073	1.015		1.51	2.03	0.921		0.918	1.133	1.045
1.386	1.342	1.084		0.93	1.296	1.543		1.16	1.084	1.117
1.404	1.218	1.332		1.176	1.322	2.072		1.404	1.35	1.381
0.698	1.004	1.106		0.928	1.719	1.858		1.134	1.19	1.138
1.297	1.004	0.941		0.955	1.208	1.063		1.048	1.518	1.552
1.106	1.418	1.271		3.855	1.445	3.282		1.066	1.194	1.231
1.122	1.323	1.044		1.067	1.396	1.381		0.998	1.483	1.046
1.323	1.311	1.73		1.108	1.416	1.941		1.183	1.283	0.949
0.899	1.206	1.145		1.509	1.435	1.639		1.154	1.595	1.286
0.752	1.328	1.286		0.82	1.647	1.323		1.192	1.281	1.179
1.013	1.228	1.127		2.278	3.386	1.478		1.054	1.26	1.178
1.314	0.948	1.297		2.029	1.439	0.981		1.017	1.352	1.245
1.168	1.074	1.136		1.277	1.207	1.242		1.13	1.256	1.258
1.039	1.072	1.236		1.375	1.036	2.317		1.575	1.224	0.948
1.447	1.731	1.099		1.886	1.189	1.163		1.102	1.181	1.797
1.328	1.136	1.375		1.254	1.212	1.185		1.13	1.338	1.324
1.122	1.355	1.255		1.2	1.707	1.625		1.489	1.075	1.067
1.314	1.175	1.317		1.195	1.375	1.589		1.061	1.143	1.412
0.848	1.195	1.226		1.268	1.419	1.238		1.237	1.202	1.252
1.333	1.313	1.194		1.06	3.119	1.2		1.256	1.5	1.24
1.254	1.054	1.077		2.244	1.697	1.508		1.314	1.04	1.567
1.025	1.121	1.223		1.435	1.459	0.975		1.117	1.432	1.231
1.485	1.16	1.078		1.942	1.307	1.187		0.98	1.316	1.153
0.875	1.245	1.396		1.183	1.336	2.46		0.986	1.077	1.14
1.145	1.227	1.259		1.11	1.551	1.507		0.987	1.291	1.268
0.957	1.315	1.338		1.355	1.063	1.608		0.894	1.872	1.266
1.272	1.143	1.193		1.17	1.926	1.353		1.266	1.283	1.021
1.201	1.397	1.259		0.992	0.977	1.013		1.095	1.027	0.996
1.144	1.123	2.094		1.344	1.246	2.796		1.142	1.167	1.058
1.18	1.307	0.936		1.399	1.345	1.198		1.734	1.083	1.172
1.029	1.213	1.082		1.597	1.495	1.081		1.024	1.28	1.637
1.081	1.337	1.132		1.335	1.149	1.393		0.957	1.151	1.279
1.296	1.44	1.788		1.368	1.638	0.953		0.999	1.219	1.022
1.16	1.103	1.016		1.34	1.712	1.395		0.995	1.351	0.977
1.35	1.112	1.201		1.313	1.255	1.747		0.848	1.066	1.041
1.039	1.148	1.041		1.454	1.838	1.15		1.286	1.164	0.858
2.189	1.212	1.2		1.77	1.485	1.443		1.01	1.353	1.327
2.021	1.271	1.26		1.266	1.47	1.881		0.899	1.518	1.094
1.422	1.653	1.388		1.119	1.096	1.301		0.908	1.321	1.087
0.98	1.213	1.282		0.992	1.011	0.977		0.986	1.21	1.246
1.167	1.015	0.988		1.421	1.065	1.019		0.99	1.214	1.064
0.883	1.113	1.106		1.073	1.666	2.367		1.059	1.032	1.296
1.233	1.036	0.965		1.291	1.783	2.096		1.321	1.267	0.86
1.005	1.254	0.876		1.472	1.687	1.506		1.137	1.346	1.234
1.393	1.023	1.2		1.102	1.171	1.452		0.783	1.247	1.195
0.967	1.112	1.294		2.593	1.41	1.056		0.787	1.108	1.387
1.033	0.92	1.288		1.084	1.856	1.097		0.918	1.301	1.267
0.833	0.989	1.211		1.505	1.75	1.414		1.809	1.086	1.207
1.313	1.268	0.96		1.592	1.166	1.346		0.882	1.878	1.169
1.458	1.2	1.128		1.167	1.223	1.897		0.739	1.346	1.599
1.017	1.099	1.304		1.755	1.206	1.268		1.21	1.145	1.169
1.285	0.92	1.138		1.812	1.08	1.332		0.891	1.262	1.292
0.972	1.163	1.267		0.997	1.453	1.14		0.996	1.108	1.356
0.987	1.165	1.239		1.207	1.067	1.029		0.741	1.268	1.17
1.052	1.051	1.088		1.57	1.161	1.449		1.233	1.015	1.117
1.434	1.075	1.32		1.664	1.326	1.036		0.914	0.955	1.088
1.191	1.227	1.174		1.127	0.985	1.126		1.001	1.201	1.214
1.367	1.146	1.06		1.305	1.278	0.888		1.11	1.181	1.103
1.072	1.14	1.055		1.624	1.578	1.42		1.575	1.2	1.265
1.072	1.407	1.151		1.056	1.408	1.287		0.971	0.975	1.165
1.076	1.167	1.019		2.312	1.45	1.445		0.831	1.192	2.069
0.872	1.051	1.116		1.016	1.089	1.264		1.222	1.37	0.902
1.11	1.08	1.24		1.259	1.03	1.824		1.116	1.12	1.156
0.986	1.077	1.251		1.492	1.199	1.586		1.124	1.401	0.992
2.35	1.217	1.323		1.44	1.429	1.022		1.015	1.02	1.478
1.367	1.536	1.099		1.746	1.282	1.629		1.957	1.128	0.959
1.551	1.086	1.379		1.23	1.491	1.626		1.18	1.399	1.188
1.32	1.157	1.275		1.598	1.571	1.047		1.067	0.976	0.95
1.214	1.357	1.24		1.077	1.219	2.052		0.914	1.187	1.119
0.933	1.108	1.073		1.83	1.747	1.443		0.917	1.333	0.974
1.067	1.127	1.088		1.6	1.263	1.232		0.751	1.029	0.964
1.809	1.414	1.046		1.782	1.952	1.498		0.937	1.194	1.257
1.57	1.213	0.899		1.199	1.232	1.16		0.939	1.108	1.208
1.035	0.986	1.156		1.153	1.145	3.901		1.165	1.225	1.163
1.412	1.327	1.077		1.449	1.559	1.21		1.206	1.059	1.044
1.223	1.21	1.355		2.086	2.57	1.046		0.999	1.168	1.159
0.956	0.988	1.236		1.708	1.666	1.981		0.961	1.172	0.847
1.22	1.245	1.161		1.215	1.423	1.711		1.019	1.21	1.334
1.358	1.252	1.215		1.69	1.439	0.959		0.862	1.317	1.091
1.091	1.091	1.294		2.348	0.998	1.496		1.192	1.084	1.128
1.204	1.069	1.157		0.981	0.936	1.6		1.142	1.226	1.274
1.297	1.303	1.189		1.34	2.183	1.108		1.058	1.168	1.158
1.444	1.372	1.354		1.089	1.32	1.202		1.058	1.266	1.107
1.348	1.062	1.79		1.273	2.019	1.827		1.161	1.127	1.159
1.187	1.174	1.081		1.482	1.438	1.48		0.957	1.15	1.275
1.411	1.231	1.228		1.235	1.073	1.648		1.064	1.492	1.121
0.923	1.34	1.157		2.273	1.152	1.222		1.189	1.324	1.157
1.211	0.902	1.296		1.005	2.129	1.628		1.121	1.211	1.047
1.214	1.164	1.197		2.749	2.686	1.494		1.044	1.383	0.916
1.153	1.101	1.21		2.143	1.047	1.716		1.028	1.122	1.229
1.16	0.951	1.281		2.52	1.595	1.036		0.987	1.518	1.171
1.108	1.236	1.158		1.314	2.113	1.566		1.063	1.245	1.097
1.238	1.23	1.28		1.268	1.94	1.583		1.244	1.206	1.334
1.044	1.215	1.12		2.074	1.474	1.433		0.861	1.333	1.326
1.26	1.097	1.221		1.039	1.422	1.492		0.871	1.335	1.387
1.909	1.045	1.298		1.214	2.144	1.044		1.359	1.371	1.209
0.661	1.274	1.142		1.322	1.699	1.172		1.087	0.989	1.794
1.089	1.252	1.077		4.185	1.653	1.172		1.008	1.026	1.23
2.657	1.153	1.025		1.432	1.117	0.944		1.089	1.458	1.109
0.971	1.058	1.083		1.471	1.313	2.059		1.119	1.082	1.146
0.892	1.308	0.994		1.65	3.008	1.341		1.394	1.214	1.476
1.31	1.854	1.025		1.626	2.636	1.149		0.903	1.038	1.409
1.736	1.157	0.939		1.194	1.203	1.275		1.097	1.343	1.403
1.616	0.829	1.637		1.316	1.005	1.811		0.792	1.577	1.196
0.928	1.208	0.93		1.343	2.445	1.293		1.213	1.161	1.077
1.379	1.209	1.197		1.526	1.657	1.855		1.227	1.028	1.53
1.585	1.426	1.163		1.367	1.746	1.172		1.048	1.354	1.23
1.262	1.251	1.853		1.798	1.116	1.525		0.824	1.34	1.287
1.384	1.026	1.307		1.531	1.728	1.374		1.083	0.971	1.03
0.862	1.231	1.184		1.436	1.851	2.555		0.832	1.168	1.144
1.461	1.033	1.254		1.341	1.215	1.263		0.956	1.281	1.452
1.246	1.238	1.024		1.379	1.723	1.341		1.109	1.213	1.219
1.099	1.177	1.138		1.407	1.294	1.225		1.249	1.044	1.357
1.287	1.175	1.293		5.704	1.26	1.019		0.902	1.106	1.113
1.412	1.238	1.172		1.16	1.06	1.307		0.812	1.41	1.129
1.115	1.263	1.085		1.245	1.371	1.131		1.189	1.243	0.924
1.041	1.616	1.108		1.285	1.3	1.736		1.308	1.175	1.149
0.936	0.97	1.221		1.712	1.102	0.994		0.986	1.511	1.256
1.256	0.94	1.225		0.901	1.476	1.092		0.802	2.498	1.209
0.902	1.21	1.053		1.234	1.064	1.427		3.127	1.042	1.037
0.933	1.484	1.018		1.649	0.935	1.325		0.974	1.315	1.937
1.008	1.139	1.062		1.337	1.231	1.178		0.979	1.168	1.03
1.096	1.128	1.308		1.82	1.817	1.601		1.127	0.97	1.146
1.299	1.186	1.208		1.15	1.381	1.169		1.859	0.937	1.139
0.934	1.059	1.074		1.36	1.447	2.122		1.651	1.138	1.253
1.386	1.31	1.228		1.002	0.61	1.525		0.914	1.138	1.092
1.014	1.146	1.181		1.073	0.942	1.143		1.417	1.255	1.021
1.271	1.036	1.157		1.195	1.637	1.305		1.092	1.422	1.127
1.21	1.222	1.389		1.586	1.12	1.306		0.87	1.132	1.281
1.106	1.128	1.236		1.609	1.094	1.378		0.78	1.144	1.1
1.34	1.164	1.446		1.141	0.881	1.095		0.859	1.266	1.183
1.203	1.587	1.527		1.669	1.1	1.162		1.259	1.167	1.263
1.256	1.638	1.222		1.314	1.275	2.281		1.133	1.41	0.993
1.315	1.188	1.142		1.755	0.597	1.06		1.471	1.22	1.303
1.083	1.307	1.2		1.041	1.313	1.369		1.138	1.557	1.288
1.36	1.274	1.173		0.923	1.227	1.038		1.449	1.479	1.217
1.175	1.066	1.055		1.894	1.799	1.503		1.412	1.204	1.302
1.315	1.696	1.015		1.446	1.298	1.031		1.098	1.776	0.953
1.224	1.282	1.068		1.476	1.064	1.314		1.023	1.233	0.894
1.177	1.282	1.114		1.093	1.194	1.084		0.958	1.505	1.03
0.941	1.148	1.314		1.897	1.333	1.196		1.079	1.216	1.037
1.044	1.393	1.255		1.277	1.585	1.403		1.139	1.187	1.138
0.935	1.428	1.109		0.961	1.658	1.049		1.095	1.194	1.182
0.979	1.058	1.15		1.222	1.393	1.554		1.142	1.243	1.189
1.157	1.212	1.685		1.477	1.057	1.063		0.991	1.323	1.34
1.315	1.618	1.178		1.594	1.011	1.031		1.304	1.245	1.165
1.187	1.722	1.091		1.372	1.544	1.197		1.257	1.221	1.143
1.048	1.016	1.272		1.083	0.951	1.097		1.087	1.082	1.509
3.447	1.098	0.921		1.547	1.784	1.136		0.952	1.412	1.521
0.966	1.176	1.317		1.124	1.16	1.526		1.084	1.269	1.182
1.012	1.174	1.243		1.537	1.662	1.026		1.188	1.29	0.863
1.254	1.3	1.203		1.233	0.986	0.776		0.972	1.481	1.375
1.121	1.019	1.087		1.73	1.753	0.966		1.116	0.97	1.272
1.373	1.045	1.503		1.761	1.066	1.006		1.249	1.06	1.199
1.378	1.104	1.195		0.82	1.483	2.112		1.075	1.31	1.32
1.486	1.228	0.845		1.378	1.381	1.444		1.091	1.199	1.173
1.263	1.432	0.997		1.585	1.363	1.046		0.954	1.158	1.052
0.877	1.169	0.876		1.205	2.023	1.836		1.061	1.151	1.192
0.935	1.208	1.169		1.479	1.267	2		1.189	1.764	1.286
1.197	1	1.312		1.399	1.093	1.089		0.992	1.126	1.251
1.302	0.977	1.347		0.97	1.081	1.691		0.886	1.479	1.233
1.048	1.153	1.023		1.165	1.419	1.109		1.441	1.285	1.254
0.941	1.487	1.163		1.249	1.491	1.459		1.069	2.175	0.941
0.917	0.941	1.231		1.045	1.568	1.574		1.221	1.252	1.188
0.952	1.238	1.474		1.014	1.425	2.079		1.086	1.286	1.155
1.384	1.086	1.113		1.743	1.32	1.648		1.14	2.034	1.045
0.88	1.036	1.167		1.287	1.341	1.223		1.147	1.127	1.273
1.067	0.904	0.992		1.249	1.29	1.613		1.176	1.098	1.059
1.273	1.303	1.272		1.017	1.125	1.294		1.317	1.141	1.093
1.061	1.242	1.351		1.407	1.276	0.917		0.993	1.019	1.099
0.986	1.024	1.089		1.604	1.604	1.111		1.145	1.117	1.083
1.279	1.204	1.181		1.416	1.096	2.002		0.785	1.285	1.02
1.133	1.196	1.222		0.861	1.581	1.349		0.951	1.093	1.528
1.072	1.071	2.576		1.707	3.168	1.455		1.265	1.359	1.482
0.955	1.328	1.382		1.713	1.582	1.794		1.107	1.375	1.083
1.107	1.235	1.3		0.944	1.571	1.019		1.085	0.99	1.236
1.254	1.149	1.139		1.411	1.894	1.046		1.604	1.06	1.494
1.203	1.32	1.37		1.725	1.182	1.309		1.005	1.135	1.117
1.108	1.355	1.379		2.312	1.921	1.46		1.498	1.39	1.08
1.048	1.054	1.235		1.556	1.939	1.478		1.387	1.822	1.144
1.115	1.046	1.254		1.29	2.946	1.169		0.961	1.221	1.152
0.854	1.326	1.014		0.733	1.058	0.989		1.115	1.132	1.33
1.115	1.225	0.999		0.89	2.027	2.422		0.849	1.596	1.374
0.615	1.118	1.331		1.205	1	1.757		1.013	1.313	1.157
0.936	1.461	1.203		2.043	1.131	1.094		1.064	1.374	1.131
2.078	1.049	1.187		1.067	1.064	1.284		0.931	1.28	1.257
1.158	0.878	1.248		0.921	1.623	1.267		1.044	1.158	1.172
1.1	0.96	1.011		1.479	1.327	1.214		0.676	1.237	1.222
1.285	0.849	1.215		1.028	1.363	1.378		0.88	1.167	1.246
1.265	1.199	1.245		1.287	1.031	1.369		1.568	1.093	1.455
1.281	1.187	1.214		1.231	0.995	0.916		0.88	1.139	1.202
1.158	1.702	1.204		1.128	1.301	1.285		0.917	1.197	1.23
1.247	1.147	2.175		1.979	1.273	1.386		1.243	1.515	1.458
1.262	1.201	1.18		1.934	1.129	1.127		1.184	1.371	1.051
1.03	1.77	1.767		1.054	1.577	1.58		1.573	1.236	1.108
1.226	1.077	1.122		1.208	1.066	1.852		0.882	1.121	1.343
1.262	1.28	1.207		1.274	1.841	1.327		0.816	1.307	1.396
1.189	0.924	1.548		1.834	1.037	1.078		1.037	1.14	1.712
1.046	1.158	1.154		1.156	1.308	1.705		1.41	1.127	1.221
1.395	1.23	1.226		1.405	1.711	1.09		1.251	1.187	1.159
1.223	1.526	1.051		1.453	1.341	2.766		0.989	1.171	1.349
1.141	1.102	1.096		1.425	1.169	1.229		1.062	1.172	1.207
1.213	1.276	1.062		1.168	1.604	1.145		1.015	1.185	1.632
1.472	1.19	1.217		1.054	2.013	1.078		1.066	1.148	1.127
2.002	0.943	1.216		1.046	1.159	1.038		1.146	1.403	1.722
1.115	1.201	1.227		1.2	1.164	1.28		1.141	1.448	1.21
1.047	1.09	1.427		1.791	1.245	1.591		1.196	1.307	1.098
1.151	0.928	1.6		1.194	1.619	1.68		1.101	1.32	1.095
1.325	1.047	1.216		1.306	1.121	6.128		1.284	1.245	1.159
0.989	1.477	1.502		0.989	1.754	2.621		0.992		1.142
1.087	0.932	1.29		1.646	1.456	1.163		0.978		1.357
1.19	1.243	1.083		1.478	1.601	1.592		1.094		1.2
1.218	1.016	1.086		1.284	1.154	1.312		1.064		1.093
1.459	1.711	1.167		2.05	0.971	0.955		1.262		1.625
1.778	0.988	1.288		1.4	1.048	1.922		1.046		1.238
1.09	1.152	1.144		1.012	1.012	1.699		1.703		1.17
1.34	1.393	1.333		1.266	0.997	1.328		0.987		1.335
1.281	1.244	1.387		2.054	1.141	1.268		1.21		1.251
1.187	1.06	1.156		1.427	0.631	1.448		1.323		1.047
1.327	1.104	0.984		1.723	0.981	1.172		0.818		1.315
1.151	1.533	1.45		1.392	1.317	1.078		0.931		1.479
1.672	1.019	1.219		1.032	1.631	1.269		1.151		1.192
1.161	1.412	1.374		1.168	1.076	1.428		1.165		1.369
0.851	1.318	1.381		0.951	1.069	1.556		1.333		1.151
1.153	1.394	1.259		1.641	1.647	2.014		1.033		1.157
1.254	1.264	1.642		1.756	1.603	1.384		1.25		0.988
1.383	1.34	1.127		2.184	1.183	1.343		1.147		1.213
1.257	1.388	1.222		1.56	1.018	1.38		1.238		1.014
1.042	1.2	1.279		1.284	1.341	1.963		1.049		1.042
1.214	1.148	1.348		1.982	1.049	1.085		1.06		1.218
1.145	1.275	1.238		2.393	1.652	1.798		1.219		1.343
1.308	1.122	1.34		1.027	1.077	1.373		1.026		1.497
1.127	1.537	1.305		1.841	1.138	1.115		1.015		1.127
1.278	1.758	0.996		2.113	1.531	1.788		0.941		1.387
1.203	0.816	1.144		1.678	3.887	1.342				1.173
1.067	1.258	1.154		1.626	1.086	1.54				1.35
1.28	1.074	1.313		1.449	1.306	1.215				0.979
1.308	1.134	1.494		0.883	1.32	1.383				1.089
1.032	1.32	1.175		1.154	1.681	1.165				1.921
1.193	1.208	1.099		0.865	1.191	1.255				1.167
1.12	1.135	2.014		1.205	2.779	1.987				1.308
1.173	1.429	2.116		1.213	1.426	1.015				1.195
1.044	1.635	1.179		0.822	1.249	1.019				1.121
1.394	1.278	1.429		1.013	1.327	1.424				1.716
1.268	1.454	1.136		1.641	1.43	1.438				1.347
1.001	1.152	1.178		1.756	0.938	1.159				1.082
1.052	1.322	1.211		2.184		1.5				1.235
1.067	1.004	1.105		1.56		1.404				1.777
0.968	1.09			1.284		1.756				1.303
1.671	1.126			1.982		1.261				0.998
1.136	1.082			2.393		1.503				1.159
1.341	1.341			1.027		1.298				1.151
1.045	1.363			1.841		1.175				1.206
1.099	1.117			2.113		1.313				1.139
1.054	1.138			1.678		1.105				1.12
1.096	0.994			1.626		1.535				1.167
1.234	1.023			1.449		1.675				1.237
1.175	1.038			0.883		1.814				1.073
1.466	1.116			1.154		1.3				1.313
2.216	1.349			0.865		1.111				1.275
1.127	1.059			1.205						1.058
0.87	1.268			1.213						1.06
1.133	1.264			0.822						0.889
1.032	1.335			1.013						1.439
1.339	1.054			1.641						1.804
0.872	1.159			1.756						0.91
1.23	1.317			2.184						0.896
0.954	1.16			1.56						1.245
0.993	0.986			1.284						1.266
1.248	1.667			1.982						0.951
1.039	1.326			2.393						1.992
1.109	1.206			1.027						1.394
1.124	1.07			1.841						1.151
1.231	1.019			2.113						1.704
1.466	1.371			1.678						1.036
1.126	1.034			1.626						1.146
1.111	1.044			1.449						1.082
1.029	1.037			0.883						1.506
1.17	1.305			1.154						1.244
1.066	1.339			0.865						1.013
1.192	1.434			1.205						1.318
1.355	1.038			1.213						1.286
1.195	1.28			0.822						1.18
0.97	1.049			1.013						1.064
1	1.145			1.705						1.208
1.045	1.264			1.214						1.603
	1.194			1.501						1.243
	1.158			1.18						1.338
	1.099			1.376						1.187
	1.105			1.768						1.785
	1.074			1.066						1.36
	0.917			1.045						1.305
	0.915			0.986						1.285
	1.214			1.643						1.34
	1.115			1.239						1.328
	1.116			1.221						1.49
	1.166			1.285						1.512
	1.246			1.473						1.117
	1.023			1.032						1.173
	1.098			1.192						1.15
	1.26			2.011						1.349
	0.98			1.665						1.064
	1.099			1.578						1.2
	0.968			1.633						1.371
	1.158			1.155						1.329
	1.215			1.134						0.958
	1.22			1.521						1.561
	1.127			0.912						0.989
	1.627			1.295						1.296
	1.481			1.093						1.391
	1			1.178						1.192
	1.046			1.088						1.374
	1.15			2.016						1.3
	1.211			2.677						1.192
	1.037			1.073						1.295
	1.077			1.791						1.143
	1.332			1.322						1.1
	1.355			1.607						1.153
	1.239			1.35						1.165
	1.222			0.89						1.093
	1.084			1.675						1.235
	1.889			1.05						1.143
	1.485			1.477						1.211
	1.21			0.98						1.436
	1.328			1.122						1.131
	1.363			1.168						2.033
	1.182			1.646						1.288
	1.19			1.175						1.077
	1.331			1.87						1.404
	1.296			1.447						0.922
	1.448			1.187						1.107
	1.408			1.009						1.357
	1.273			1.673						1.024
	1.203			1.927						1.338
	1.716			1.051						1.069
	1.135			1.902						1.509
	1.246			0.903						1.132
	1.343			1.454						1.167
	1.375			1.559						1.105
	2.091			1.064						1.298
	1.24			1.064						1.127
	1.139			1.537						1.334
	1.391			0.951						1.168
	1.063			1.013						0.851
	1.734			1.763						1.252
	1.264			1.082						1.724
	1.203			2.178						1.152
	1.32			1.389						1.469
	1.253			1.188						1.196
	1.285			1.491						1.276
	1.234			1.343						1.234
	1.294			1.189						1.957
	1.38			1.662						1.183
	1.581			1.174						1.278
	0.917			1.045						1.124
	0.975			1.067						1.236
	1.228			1.233						1.437
	1.199			0.876						1.011
	1.225			1.151						1.093
	1.352			1.456						1.234
	1.251			1.008						1.045
	1.325			1.13						1.283
	1.466			1.156						1.208
	1.157			1.468						1.038
	1.22			1.245						1.278
	0.997			1.176						1.558
	1.104			1.702						1.164
	0.993			1.315						1.217
	1.207			1.397						1.083
	1.89			1.375						1.118
	1.099			1.36						0.9
	1.179			2.284						1.298
	1.475			1.417						6.019
	1.188			0.994						1.233
	1.597			0.906						1.12
	1.223			1.258						1.465
	1.265			1.483						1.196
	1.17			1.344						1.053
	1.324			1.513						1.098
	1.22			0.907						1.376
	1.3			0.868						1.343
	1.084			0.879						1.315
	1.251			0.762						1.363
	1.203			1.353						1.299
	1.493			1.045						1.62
	1.483			1.831						1.172
	1.296			1.584						1.228
	0.964			0.865						1.548
	0.941			1.219						1.002
	1.035			1.064						1.117
	1.535			1.486						1.208
	1.367			1.882						1.178
	1.042			1.247						1.319
	1.215			1.622						1.064
	1.181			2.733						1.26
	1.22			1.26						1.012
	1.869			4.056						1.021
	0.876			1.528						1.021
	1.202			1.272						0.857
	1.21			1.101						1.206
	1.366			1.329						0.98
	1.236			1.052						1.354
	1.182			1.113						1.517
	1.112			1.125						1.319
	1.225			1.362						1.3
	1.163			0.984						1.886
	1.435			1.421						0.919
	1.211			1.107						0.886
	0.934			1.568						1.14
	1.101			1.342						1.11
	1.359			1.082						1.28
	0.797			1.079						1.466
	1.04			1.367						1.3
	1			1.174						1.54
	1.361			1.465						1.391
	1.062			1.42						1.282
	1.065			1.464						1.296
	1.242			1.001						1.178
	1.231			1.853						0.902
	1.108			1.859						1.07
	1.069			1.183						1.111
	1.215			1.568						1.158
	1.12			0.89						1.077
	1.236			1.238						0.992
	1.15			0.986						1.192
	1.016			1.541						1.086
	1.096			0.841						1.101
	0.955			1.062						1.138
	1.077			1.452						1.283
	0.96			1.384						1.055
	1.266			1.464						1.12
	0.983			1.657						0.831
	1.1			1.325						1.101
	1.235			0.983						1.131
	1.266			1.092						1.03
	0.981			0.944						1.163
	1.273			2.525
	1.256			1.189
	1.148			1.442
	1.477			1.11
	1.217			0.661
	1.166			1.192
	1.238			1.35
	1.101			1.479
	1.097			0.986
	1.478			1.238
	1.236			1.399
	1.231			1.452
	1.411			1.214
	1.235			1.958
	1.018			0.817
	1.469			1.508
	1.184			1.295
	1.096			1.124
	1.143			1.357
	1.108			1.187
	0.968			1.297
	1.084			1.439
	1.236			1.629
	1.247			1.023
	1.311			0.837
	1.189			1.149
	1.134			1.513
	1.45			1.49
	1.095			1.287
	1.251			1.247
	1.292			2.453
	1.276			2.832
	1.161			1.038
	1.181			1.176
	1.161			1.1
	1.153			1.34
	1.205			1.897
	0.945			1.035
	1.273			1.344
	1.105			1.68
	1.24			1.258
	1.056			1.806
	1.322			1.647
	1.216			1.528
	1.529			1.4
	1.166			1.205
	1.108			1.564
	1.045			1.491
	1.207			1.421
	1.29			1.478
	1.238			2.9
	1.162			1.606
	1.343			1.772
	1.071			1.527
	1.632			1.733
	1.163			1.788
	1.222			1.037
	1.661			1.336
	1.994			1.497
	0.96			1.297
	1.176			0.832
	1.149			1.355
	1.527			1.261
	1.243			1.601
	1.082			2.508
	1.133			1.74
	1.137			0.921
	1.159			1.806
	1.577			1.78
	0.954			1.094
	1.184			0.987
	1.183			1.137
	1.019			1.355
	1.303			0.91
	1.159			0.994
	2.031			1.403
	1.448			0.936
	1.228			1.204
	1.084			1.168
	1.421			1.353
	1.233			1.219
	1.018			1.16
	1.157			1.496
	1.354			1.183
	1.208			1.653
	1.119			1.423
	1.075			1.421
	1.613			1.747
	1.272			1.532
				1.618
				1.056
				1.029
				1.126
				1.559
				0.822
				2.551
				2.94
				1.16
				1.401
				1.29
				1.214
				1.1
				1.221
				1.057
				1.455
				1.147
				1.037
				2.377
				1.038
				1.443
