# Supplementary material for: A conserved cell division protein directly regulates FtsZ dynamics in filamentous and unicellular actinobacteria
Source: eLife. 2021 Mar 17;10:e63387. doi: 10.7554/eLife.63387 (PMC7968930; doi:10.7554/eLife.63387)
Supplement: Figure 5—figure supplement 3—source data 1. [file elife-63387-fig5-figsupp3-data1.xlsx]

## Sheet: Calculations
Standard curve calculation
			Retention (ml)
	kDa	log MW	Run1	Run2	Average
	670	2.82607	8.28	8.57	8.425
	158	2.19866	11.15	10.5	10.825
	44	1.64345	12.68	13.2	12.94
	17	1.23045	14.44	14.93	14.685
	1.35	0.130334	19.01	19.53	19.27
Molecular weight calculation
		SepH FL
			Retention (mL) SepH Peak	Calculated Log MW	MW	Number of Subunits (SepH = 38.2 kDa)	Mean MW	Mean Number of Subunits
		Run 1	10.75	2.22043	166.121	4.34872	160.218	4.19418
		Run 2	10.73	2.22539	168.03	4.39869
		Run 3	10.97	2.16584	146.502	3.83513
		SepHG79P
		Run 1	10.93	2.17577	149.888	4.56976	152.946	4.66298
		Run 2	10.86	2.19313	156.003	4.7562
		SepH-NTD
		Run 1	12.67	1.74407	55.4719	2.629	49.0623	2.32523
		Run 2	13.13	1.62995	42.6527	2.02146
		SepH-CTD
		Run 1	12.15	1.87309	74.6595	4.36605	69.6913	4.07552
		Run 2	12.4	1.81106	64.7232	3.78498

## Sheet: Raw data
ml	SepH WT 1	SepH WT 2	SepH WT 3	SepHG79P 1	SepHG79P 2	NTD 1	NTD 2	CTD 1	CTD 2
											Data used for Figure S5D are highlighted in yellow
0.000374	0.795509	0.310113	0.540529	0.125379	2.46026	0.700957	0.397855	0.67089	0.028932
0.001207	0.716303	0.007669	0.461323	0.176614	1.20352	0.706147	0.398221	0.636559	0.02652
0.002039	0.726697	0.007375	0.471717	0.177386	1.20173	0.713592	0.398074	0.646886	0.026933
0.002872	0.735533	0.007302	0.480553	0.178735	1.20142	0.72111	0.398635	0.657823	0.028416
0.003704	0.744687	0.006463	0.489707	0.179275	1.20179	0.731028	0.399538	0.667786	0.027307
0.004537	0.752811	0.005798	0.497831	0.179536	1.20261	0.741976	0.400515	0.678	0.026621
0.005369	0.761377	0.005944	0.506397	0.180204	1.20356	0.751117	0.400251	0.687114	0.02615
0.006202	0.768041	0.00617	0.513061	0.180776	1.20434	0.761356	0.399987	0.699492	0.026351
0.007034	0.777811	0.006517	0.522831	0.180808	1.20512	0.771383	0.3995	0.711837	0.02676
0.007867	0.785283	0.006753	0.530303	0.180841	1.20547	0.776561	0.398976	0.720386	0.02698
0.008699	0.79073	0.006316	0.53575	0.181163	1.20574	0.780773	0.398748	0.723878	0.027038
0.009532	0.793589	0.005882	0.538609	0.181518	1.20577	0.783764	0.39894	0.727168	0.027097
0.010364	0.796158	0.005643	0.541178	0.18188	1.20535	0.785703	0.399132	0.727737	0.027086
0.011197	0.797407	0.00555	0.542427	0.182248	1.20494	0.785375	0.398975	0.7317	0.027076
0.012029	0.799827	0.005458	0.544847	0.182616	1.20546	0.785371	0.398574	0.733308	0.027233
0.012862	0.799217	0.00525	0.544237	0.183686	1.20671	0.785747	0.398399	0.736135	0.02826
0.013694	0.80056	0.00522	0.54558	0.184486	1.20677	0.788656	0.399495	0.737681	0.029184
0.014527	0.801435	0.005868	0.546455	0.18394	1.19911	0.789192	0.394278	0.740486	0.029521
0.015359	0.799802	0.005962	0.544822	0.184684	1.07981	0.789467	0.296988	0.742157	0.029065
0.016192	0.799133	0.006469	0.544153	0.185224	0.992016	0.788817	0.006983	0.744204	0.029416
0.017024	0.799786	0.004764	0.544806	0.186723	0.415702	0.788504	0.007373	0.744689	0.029098
0.017857	0.800387	0.005059	0.545407	0.186916	0.41401	0.788171	0.007272	0.745537	0.028279
0.018689	0.801732	0.005929	0.546752	0.187724	0.414568	0.792191	0.006982	0.749193	0.029375
0.019522	0.802351	0.006049	0.547371	0.18881	0.413571	0.792683	0.006862	0.751517	0.028652
0.020354	0.80409	0.006349	0.54911	0.189405	0.413723	0.794682	0.006543	0.753289	0.02655
0.021187	0.806259	0.006396	0.551279	0.189103	0.398243	0.79508	0.005948	0.756076	0.026163
0.022019	0.809709	0.006528	0.554729	0.189475	0.21698	0.796149	0.005752	0.758373	0.024043
0.022852	0.810059	0.007295	0.555079	0.189246	0.217376	0.799224	0.005564	0.758113	0.023007
0.023684	0.813393	0.007899	0.558413	0.189002	0.217831	0.802452	0.006323	0.760939	0.024087
0.024517	0.813585	0.008846	0.558605	0.188497	0.218308	0.802596	0.006699	0.76266	0.023003
0.025349	0.813585	0.010556	0.558605	0.18801	0.216729	0.802537	0.006418	0.7649	0.022339
0.026182	0.81325	0.012757	0.55827	0.188771	0.215647	0.801594	0.00615	0.76732	0.020906
0.027014	0.815416	0.015054	0.560436	0.189933	0.214221	0.800789	0.006527	0.767973	0.022393
0.027847	0.816332	0.016536	0.561352	0.190189	0.213438	0.800858	0.007358	0.76925	0.021918
0.028679	0.815828	0.017532	0.560848	0.190414	0.213267	0.803701	0.006812	0.771935	0.020247
0.029512	0.817178	0.018554	0.562198	0.190374	0.21299	0.805608	0.005889	0.776002	0.021957
0.030344	0.817057	0.019616	0.562077	0.190355	0.212506	0.806753	0.005683	0.778423	0.022326
0.031177	0.816822	0.019864	0.561842	0.190683	0.21163	0.806734	0.006588	0.783232	0.021669
0.032009	0.816748	0.02238	0.561768	0.191488	0.211388	0.809105	0.005488	0.784943	0.02117
0.032842	0.816579	0.02486	0.561599	0.190906	0.211636	0.81323	0.006637	0.788961	0.020066
0.033674	0.818437	0.025979	0.563457	0.189952	0.210866	0.81487	0.007678	0.791851	0.01865
0.034507	0.821308	0.028054	0.566328	0.189157	0.211346	0.817005	0.006487	0.793644	0.018872
0.035339	0.82052	0.029054	0.56554	0.189971	0.210392	0.81903	0.007397	0.795383	0.019276
0.036172	0.821443	0.02976	0.566463	0.189761	0.210839	0.822688	0.009119	0.796789	0.019986
0.037004	0.822123	0.031343	0.567143	0.190717	0.210187	0.826286	0.009962	0.798286	0.020551
0.037837	0.821948	0.03367	0.566968	0.190707	0.210779	0.82882	0.0114	0.80069	0.019455
0.038669	0.824952	0.034175	0.569972	0.190259	0.211541	0.831355	0.010815	0.804065	0.01949
0.039502	0.826711	0.03494	0.571731	0.190532	0.211074	0.832844	0.012543	0.804188	0.019669
0.040334	0.826874	0.036655	0.571894	0.190629	0.212577	0.833297	0.012241	0.806124	0.020793
0.041167	0.826652	0.036374	0.571672	0.189889	0.212718	0.835817	0.013784	0.810713	0.022265
0.041999	0.825625	0.036683	0.570645	0.190683	0.212726	0.837983	0.014887	0.814812	0.022034
0.042832	0.826367	0.037387	0.571387	0.190868	0.213216	0.841108	0.015508	0.817909	0.023086
0.043664	0.826376	0.03971	0.571396	0.191745	0.214306	0.841572	0.015544	0.821365	0.0238
0.044496	0.825929	0.040872	0.570949	0.193422	0.214176	0.841368	0.015117	0.825129	0.023974
0.045329	0.825979	0.041629	0.570999	0.194402	0.213923	0.843022	0.015039	0.826636	0.025373
0.046161	0.827216	0.041274	0.572236	0.194934	0.214934	0.845322	0.016096	0.829472	0.02583
0.046994	0.828279	0.039842	0.573299	0.194215	0.215212	0.848143	0.017332	0.831062	0.025253
0.047826	0.829686	0.039771	0.574706	0.193778	0.216696	0.84935	0.017245	0.833746	0.023949
0.048659	0.829889	0.039649	0.574909	0.193742	0.216973	0.850737	0.017701	0.836155	0.023861
0.049491	0.830819	0.038791	0.575839	0.194284	0.217953	0.850841	0.017912	0.838275	0.023025
0.050324	0.832108	0.038318	0.577128	0.193818	0.218699	0.851899	0.017648	0.840513	0.023178
0.051156	0.832391	0.038654	0.577411	0.194944	0.217822	0.854251	0.017705	0.842245	0.023733
0.051989	0.834409	0.039174	0.579429	0.195884	0.218377	0.856852	0.017603	0.843994	0.024239
0.052821	0.837968	0.039701	0.582988	0.19614	0.217367	0.857269	0.018219	0.847079	0.025063
0.053654	0.840333	0.040563	0.585353	0.197421	0.217104	0.85768	0.018449	0.848898	0.024952
0.054486	0.842203	0.042625	0.587223	0.198489	0.217497	0.862476	0.017519	0.850324	0.025112
0.055319	0.841865	0.04251	0.586885	0.199313	0.218192	0.865628	0.017246	0.85272	0.023833
0.056151	0.843915	0.043664	0.588935	0.198871	0.218677	0.868517	0.016022	0.855543	0.02209
0.056984	0.846283	0.046075	0.591303	0.199098	0.217911	0.871491	0.016487	0.859411	0.020501
0.057816	0.849564	0.049337	0.594584	0.199779	0.217499	0.876222	0.016557	0.864147	0.019989
0.058649	0.85285	0.053537	0.59787	0.200921	0.216305	0.88271	0.015045	0.870451	0.019716
0.059481	0.854276	0.057107	0.599296	0.202338	0.2169	0.889771	0.016664	0.876156	0.020824
0.060314	0.857261	0.061757	0.602281	0.202289	0.216956	0.893521	0.015818	0.881635	0.021544
0.061146	0.862319	0.066583	0.607339	0.202869	0.215702	0.896956	0.015712	0.885563	0.020716
0.061979	0.868163	0.072414	0.613183	0.203754	0.215435	0.899154	0.015197	0.887772	0.020159
0.062811	0.874144	0.078567	0.619164	0.204995	0.21692	0.902189	0.015227	0.890577	0.02089
0.063644	0.880263	0.086251	0.625283	0.206102	0.217233	0.903606	0.015451	0.892972	0.021306
0.064476	0.887359	0.093911	0.632379	0.209026	0.21523	0.907041	0.014937	0.895222	0.022156
0.065309	0.897191	0.10229	0.642211	0.211623	0.215444	0.911485	0.015158	0.896726	0.023109
0.066141	0.906099	0.111602	0.651119	0.212711	0.216912	0.91522	0.015831	0.899551	0.023021
0.066974	0.916235	0.120334	0.661255	0.213252	0.217054	0.919402	0.015437	0.902423	0.023665
0.067806	0.924995	0.130721	0.670015	0.214828	0.217772	0.922359	0.01614	0.905575	0.026194
0.068639	0.935302	0.140641	0.680322	0.216014	0.21658	0.925386	0.016664	0.907812	0.02795
0.069471	0.945112	0.150285	0.690132	0.217237	0.216203	0.928022	0.017198	0.909811	0.029139
0.070304	0.957856	0.161239	0.702876	0.217727	0.215959	0.929453	0.016928	0.911502	0.032289
0.071136	0.967581	0.173949	0.712601	0.219833	0.215902	0.93202	0.016337	0.914389	0.033741
0.071969	0.979026	0.185546	0.724046	0.220802	0.216579	0.934507	0.017184	0.918264	0.035022
0.072801	0.990958	0.197875	0.735978	0.22146	0.215893	0.935856	0.017082	0.918694	0.036193
0.073634	1.00289	0.210366	0.747909	0.22232	0.216476	0.937542	0.017657	0.918247	0.037925
0.074466	1.01502	0.222537	0.760041	0.223533	0.216462	0.93974	0.01593	0.918773	0.03977
0.075299	1.02693	0.234405	0.771948	0.224847	0.215904	0.940032	0.015313	0.919979	0.04187
0.076131	1.04097	0.246926	0.78599	0.225747	0.215252	0.939869	0.015922	0.922223	0.043059
0.076964	1.05464	0.258832	0.799662	0.22869	0.215034	0.939541	0.016712	0.922812	0.044589
0.077796	1.0671	0.270007	0.812124	0.230994	0.214304	0.937789	0.0182	0.923887	0.048239
0.078629	1.08057	0.281154	0.825587	0.231689	0.213092	0.934382	0.019517	0.923685	0.050436
0.079461	1.09401	0.291574	0.839028	0.232579	0.213758	0.930387	0.019949	0.922713	0.052948
0.080294	1.10638	0.301118	0.851398	0.233962	0.21345	0.926917	0.018759	0.921302	0.052983
0.081126	1.12104	0.311414	0.866062	0.235038	0.213241	0.924754	0.018952	0.920607	0.052239
0.081959	1.13199	0.320625	0.877014	0.236386	0.215377	0.924452	0.020191	0.919434	0.054878
0.082791	1.14299	0.329519	0.888014	0.237186	0.216219	0.923519	0.020922	0.919259	0.056329
0.083624	1.15465	0.337321	0.899672	0.237226	0.215536	0.921991	0.021504	0.919468	0.057676
0.084456	1.16604	0.345206	0.911056	0.237109	0.215342	0.922426	0.021109	0.919939	0.059455
0.085289	1.17769	0.351371	0.922709	0.235858	0.214791	0.921447	0.021426	0.921286	0.060276
0.086121	1.18505	0.358062	0.930066	0.235179	0.213716	0.918677	0.021634	0.922096	0.060911
0.086954	1.19358	0.362384	0.938604	0.235416	0.212943	0.917047	0.022163	0.922519	0.061723
0.087786	1.20295	0.369672	0.947972	0.236465	0.212597	0.914883	0.023153	0.922278	0.062414
0.088619	1.21167	0.375514	0.956692	0.237069	0.211736	0.913592	0.023895	0.922229	0.064154
0.089451	1.22021	0.381644	0.965229	0.238214	0.21291	0.912821	0.02353	0.922291	0.066262
0.090284	1.23016	0.389487	0.97518	0.239324	0.214638	0.911895	0.023499	0.922873	0.068151
0.091116	1.237	0.396447	0.982018	0.240171	0.214714	0.912095	0.024519	0.924555	0.069392
0.091949	1.24702	0.401412	0.992043	0.24134	0.213732	0.913048	0.026056	0.925382	0.068673
0.092781	1.25592	0.405727	1.00094	0.242671	0.212542	0.913417	0.026724	0.925848	0.068596
0.093614	1.26338	0.409404	1.0084	0.243436	0.212062	0.913152	0.028254	0.928079	0.071003
0.094446	1.27021	0.412202	1.01523	0.245101	0.211513	0.913175	0.029531	0.930206	0.071116
0.095279	1.27739	0.414605	1.02241	0.245296	0.21233	0.911451	0.031576	0.930509	0.071338
0.096111	1.28534	0.417463	1.03036	0.246703	0.212539	0.910076	0.033507	0.931134	0.07265
0.096944	1.29131	0.421315	1.03634	0.248414	0.212408	0.909297	0.034046	0.931234	0.07474
0.097776	1.29927	0.425246	1.04429	0.248546	0.212887	0.909036	0.033827	0.93226	0.076561
0.098609	1.30668	0.430127	1.0517	0.249995	0.214315	0.909771	0.033512	0.932702	0.076287
0.099441	1.31437	0.434455	1.05939	0.251523	0.215294	0.910526	0.03387	0.934165	0.077565
0.100274	1.31941	0.437488	1.06443	0.252015	0.214363	0.911559	0.033912	0.935402	0.077784
0.101106	1.32489	0.443143	1.06991	0.251439	0.215102	0.912883	0.03502	0.936463	0.079328
0.101939	1.32762	0.447391	1.07264	0.251779	0.214405	0.91382	0.035013	0.935583	0.083465
0.102771	1.33412	0.451179	1.07914	0.25208	0.210871	0.913661	0.034567	0.935965	0.083866
0.103604	1.34048	0.455342	1.0855	0.253871	0.210975	0.91505	0.034782	0.93673	0.085248
0.104436	1.34733	0.46066	1.09235	0.254789	0.210944	0.917234	0.036824	0.937175	0.085858
0.105269	1.35308	0.466525	1.0981	0.255428	0.210441	0.918039	0.038213	0.938372	0.087658
0.106101	1.35832	0.470603	1.10334	0.255485	0.212741	0.91817	0.038716	0.939455	0.08905
0.106934	1.36488	0.474767	1.1099	0.256404	0.213525	0.919231	0.039931	0.941515	0.088924
0.107766	1.37004	0.480302	1.11506	0.257777	0.213736	0.91988	0.0395	0.942832	0.089882
0.108599	1.37494	0.48385	1.11996	0.258306	0.214344	0.920183	0.039864	0.941983	0.08966
0.109431	1.38109	0.488895	1.12611	0.259057	0.214348	0.919626	0.039702	0.943339	0.088172
0.110264	1.38552	0.491168	1.13054	0.258878	0.213368	0.919646	0.040755	0.945614	0.087315
0.111096	1.39142	0.494903	1.13644	0.260455	0.212869	0.920555	0.041958	0.946341	0.087922
0.111929	1.39688	0.49817	1.1419	0.261481	0.213637	0.921796	0.042903	0.94575	0.088151
0.112761	1.40255	0.501004	1.14757	0.261638	0.213603	0.922215	0.043179	0.945147	0.089857
0.113594	1.40677	0.505077	1.15179	0.262481	0.215789	0.922526	0.043563	0.944791	0.091694
0.114426	1.41322	0.507035	1.15823	0.263023	0.217278	0.924132	0.04294	0.9457	0.091325
0.115259	1.41829	0.511773	1.16331	0.263063	0.218281	0.925158	0.042203	0.947333	0.091905
0.116091	1.42236	0.515042	1.16738	0.263772	0.218985	0.928163	0.042532	0.950129	0.093399
0.116924	1.42448	0.520061	1.1695	0.263158	0.219223	0.93075	0.043072	0.952678	0.093739
0.117756	1.4289	0.523795	1.17392	0.262716	0.22043	0.931552	0.043818	0.954053	0.094774
0.118589	1.43215	0.527589	1.17717	0.264789	0.22126	0.931798	0.047022	0.954583	0.095575
0.119421	1.43676	0.530069	1.18178	0.265878	0.221989	0.931441	0.050605	0.954219	0.097114
0.120254	1.43917	0.531779	1.18419	0.265975	0.222411	0.930617	0.053636	0.954291	0.096598
0.121086	1.44514	0.535325	1.19016	0.265937	0.223474	0.929924	0.057201	0.954343	0.097249
0.121919	1.45012	0.537656	1.19514	0.26555	0.222495	0.929726	0.060045	0.953731	0.097662
0.122751	1.45452	0.538573	1.19954	0.267253	0.22228	0.929674	0.063611	0.955254	0.095889
0.123584	1.45954	0.54174	1.20456	0.266303	0.223255	0.931087	0.064866	0.956339	0.095897
0.124416	1.46457	0.543395	1.20959	0.266586	0.222135	0.931842	0.067268	0.957015	0.096537
0.125249	1.46774	0.545736	1.21276	0.267614	0.222641	0.932288	0.067922	0.957073	0.096239
0.126081	1.47105	0.547158	1.21607	0.268653	0.222307	0.932934	0.070913	0.956838	0.095351
0.126914	1.47522	0.548576	1.22024	0.269889	0.221306	0.935061	0.074012	0.957755	0.094543
0.127746	1.47903	0.550657	1.22405	0.269492	0.22034	0.936356	0.075993	0.957779	0.094024
0.128579	1.48373	0.553481	1.22875	0.269962	0.219696	0.936534	0.079067	0.957887	0.093561
0.129411	1.48783	0.555139	1.23285	0.271386	0.219821	0.937352	0.081792	0.95888	0.093049
0.130244	1.49135	0.555776	1.23637	0.271177	0.220796	0.93978	0.08374	0.958681	0.092824
0.131076	1.49497	0.558192	1.23999	0.272529	0.222059	0.94253	0.086305	0.958948	0.094421
0.131909	1.49572	0.55965	1.24074	0.272624	0.222017	0.943725	0.08907	0.960641	0.093742
0.132741	1.4986	0.561231	1.24362	0.273957	0.221318	0.945002	0.09222	0.961857	0.093997
0.133574	1.50045	0.563693	1.24547	0.274722	0.222451	0.945419	0.095205	0.963065	0.093401
0.134406	1.50476	0.565053	1.24978	0.274614	0.221593	0.945401	0.09723	0.964976	0.093158
0.135239	1.50456	0.56969	1.24958	0.275541	0.221293	0.94568	0.099134	0.966136	0.092965
0.136071	1.50725	0.570512	1.25227	0.27712	0.222291	0.946053	0.101935	0.965558	0.092337
0.136904	1.51099	0.573299	1.25601	0.277528	0.222635	0.9466	0.103974	0.964041	0.092884
0.137736	1.51528	0.574582	1.2603	0.278787	0.224185	0.947501	0.10572	0.962775	0.092858
0.138569	1.5189	0.577256	1.26392	0.280029	0.225083	0.948506	0.107639	0.962975	0.092219
0.139401	1.5202	0.580095	1.26522	0.279866	0.225261	0.949884	0.108126	0.964659	0.091834
0.140234	1.52137	0.581777	1.26639	0.279695	0.225557	0.952093	0.109549	0.965605	0.091188
0.141066	1.52489	0.586728	1.26991	0.2809	0.225622	0.952663	0.110539	0.964783	0.091685
0.141899	1.52712	0.589692	1.27214	0.28293	0.226384	0.952497	0.111057	0.96345	0.092158
0.142731	1.52994	0.592254	1.27496	0.284881	0.228276	0.95277	0.112995	0.961998	0.09306
0.143564	1.53351	0.595924	1.27853	0.28605	0.229766	0.952801	0.114672	0.960888	0.093191
0.144396	1.53385	0.598312	1.27887	0.289066	0.231777	0.953497	0.117691	0.960671	0.093469
0.145229	1.53639	0.60267	1.28141	0.289346	0.233504	0.954579	0.119838	0.960883	0.093066
0.146061	1.54063	0.606267	1.28565	0.289933	0.23336	0.954192	0.12183	0.96192	0.093447
0.146894	1.54404	0.608239	1.28906	0.292146	0.234693	0.953834	0.122628	0.963024	0.094606
0.147726	1.54721	0.611465	1.29223	0.292285	0.236202	0.953766	0.123819	0.961845	0.095035
0.148559	1.54964	0.61423	1.29465	0.294734	0.24018	0.953509	0.126265	0.961357	0.096492
0.149391	1.5537	0.617477	1.29872	0.295062	0.242189	0.953989	0.128632	0.961716	0.09671
0.150224	1.55527	0.620923	1.30029	0.295575	0.243687	0.954142	0.129384	0.961953	0.096737
0.151056	1.55944	0.624885	1.30446	0.297601	0.245641	0.953323	0.130053	0.96214	0.096944
0.151889	1.56308	0.628331	1.3081	0.298131	0.245885	0.952853	0.130427	0.962827	0.096708
0.152721	1.56749	0.632728	1.31251	0.298738	0.247016	0.952986	0.130745	0.963432	0.096655
0.153554	1.57005	0.636405	1.31507	0.298429	0.249482	0.95193	0.130196	0.964565	0.095965
0.154386	1.5733	0.639575	1.31831	0.299751	0.251379	0.951159	0.131157	0.965459	0.096793
0.155219	1.57826	0.643714	1.32328	0.300349	0.252882	0.951251	0.132828	0.965393	0.096968
0.156051	1.58416	0.646674	1.32918	0.300107	0.254846	0.951339	0.135567	0.964876	0.097169
0.156884	1.58814	0.650687	1.33316	0.299596	0.256598	0.952285	0.136713	0.964239	0.098117
0.157716	1.59108	0.653041	1.3361	0.301511	0.258791	0.953364	0.138582	0.964296	0.09773
0.158549	1.59417	0.655864	1.33919	0.302716	0.258941	0.953283	0.140642	0.965906	0.097321
0.159381	1.59626	0.658771	1.34128	0.305051	0.259605	0.953621	0.142121	0.967543	0.09655
0.160214	1.60022	0.661452	1.34524	0.304887	0.26144	0.954379	0.143476	0.967929	0.097138
0.161046	1.60615	0.665105	1.35117	0.305375	0.261151	0.955674	0.143453	0.969907	0.096649
0.161879	1.60961	0.665576	1.35463	0.305856	0.258592	0.958323	0.143804	0.97158	0.095894
0.162711	1.61358	0.665927	1.3586	0.305558	0.282721	0.96045	0.144941	0.973861	0.095814
0.163544	1.61675	0.669624	1.36177	0.306359	0.319407	0.961613	0.14451	0.978389	0.094542
0.164376	1.62159	0.671418	1.36661	0.307533	0.353964	0.962599	0.14494	0.981565	0.096568
0.165209	1.62753	0.674541	1.37254	0.308433	0.379721	0.962728	0.144821	0.982059	0.096409
0.166041	1.63037	0.676851	1.37539	0.309699	0.392591	0.962692	0.14461	0.983156	0.097233
0.166874	1.62999	0.678775	1.37501	0.310722	0.398809	0.963789	0.145341	0.983709	0.097264
0.167706	1.63278	0.682622	1.3778	0.309837	0.401284	0.964159	0.14672	0.98324	0.097467
0.168539	1.63316	0.68558	1.37818	0.311366	0.401914	0.963264	0.147159	0.984082	0.098008
0.169371	1.63532	0.687747	1.38034	0.311069	0.400793	0.963108	0.146131	0.985115	0.097239
0.170204	1.63641	0.688544	1.38143	0.312799	0.400637	0.964091	0.145866	0.986637	0.097759
0.171036	1.64017	0.691232	1.38519	0.312911	0.399805	0.966381	0.146866	0.98826	0.099007
0.171869	1.64078	0.692537	1.3858	0.312906	0.397699	0.968414	0.148254	0.989865	0.100207
0.172701	1.64314	0.696103	1.38816	0.313543	0.397776	0.968478	0.150365	0.989984	0.099837
0.173534	1.64604	0.69646	1.39106	0.314473	0.398431	0.968893	0.150983	0.988997	0.100319
0.174366	1.64881	0.699878	1.39383	0.317119	0.396513	0.969371	0.152375	0.986681	0.10162
0.175199	1.65033	0.70218	1.39535	0.316827	0.395073	0.969252	0.152951	0.984835	0.101842
0.176031	1.65138	0.703782	1.3964	0.317975	0.395406	0.969341	0.153363	0.984429	0.102226
0.176864	1.65274	0.704313	1.39776	0.31977	0.394081	0.968924	0.153656	0.984388	0.102371
0.177696	1.65319	0.705659	1.39821	0.321094	0.394482	0.9677	0.156088	0.985832	0.103125
0.178529	1.65436	0.708989	1.39938	0.321912	0.394739	0.966059	0.158036	0.986857	0.103311
0.179361	1.65803	0.711015	1.40305	0.322164	0.395332	0.96445	0.160275	0.984976	0.104051
0.180194	1.66068	0.7124	1.4057	0.320699	0.394558	0.963649	0.16165	0.983847	0.105755
0.181026	1.66256	0.712812	1.40758	0.321523	0.393017	0.962143	0.162837	0.982986	0.106215
0.181859	1.66412	0.713311	1.40914	0.321471	0.392446	0.958856	0.163828	0.980868	0.105967
0.182691	1.66672	0.716033	1.41174	0.32274	0.393826	0.956211	0.165418	0.979848	0.106265
0.183524	1.6688	0.717975	1.41382	0.324784	0.367307	0.955825	0.167622	0.978987	0.106012
0.184356	1.66949	0.718147	1.41451	0.325429	0.329669	0.955749	0.169177	0.977553	0.106579
0.185189	1.66834	0.721278	1.41336	0.32602	0.29517	0.955465	0.170673	0.976787	0.105777
0.186021	1.6691	0.721967	1.41412	0.326272	0.268126	0.956485	0.172378	0.977471	0.106913
0.186854	1.67035	0.722776	1.41537	0.327478	0.252633	0.956744	0.174373	0.976914	0.107578
0.187686	1.67483	0.722673	1.41985	0.32874	0.24359	0.956524	0.175867	0.976198	0.108598
0.188519	1.67714	0.723878	1.42216	0.3301	0.239557	0.956267	0.177537	0.975686	0.108021
0.189351	1.68217	0.725496	1.42719	0.33081	0.23763	0.956726	0.17879	0.975505	0.107215
0.190184	1.68463	0.727292	1.42965	0.330413	0.235051	0.957349	0.179761	0.973191	0.108042
0.191016	1.68558	0.729728	1.4306	0.329747	0.233587	0.956704	0.180706	0.971169	0.108056
0.191849	1.68577	0.729705	1.43079	0.330856	0.231674	0.955178	0.181246	0.971007	0.109676
0.192681	1.68833	0.730542	1.43335	0.331529	0.231206	0.954078	0.181822	0.970207	0.110585
0.193514	1.69059	0.730706	1.43561	0.331584	0.229535	0.953883	0.182571	0.969454	0.110556
0.194346	1.69307	0.732619	1.43809	0.331672	0.228478	0.953068	0.183783	0.969299	0.10984
0.195179	1.69564	0.732091	1.44066	0.330165	0.22769	0.952813	0.184744	0.97019	0.109638
0.196011	1.69893	0.733506	1.44395	0.330642	0.22583	0.953195	0.186116	0.971575	0.108935
0.196844	1.70063	0.734033	1.44565	0.330005	0.223255	0.951888	0.188293	0.972471	0.108542
0.197676	1.7041	0.735738	1.44912	0.330568	0.221857	0.951279	0.189778	0.972453	0.109116
0.198509	1.70798	0.736343	1.453	0.329835	0.219116	0.953221	0.189045	0.971623	0.108976
0.199341	1.7126	0.736983	1.45762	0.328294	0.216576	0.953891	0.188714	0.973277	0.109682
0.200174	1.71393	0.737981	1.45895	0.329158	0.21372	0.953151	0.187377	0.976577	0.110078
0.201006	1.71718	0.738498	1.4622	0.329957	0.211438	0.952675	0.187351	0.977092	0.10981
0.201839	1.72041	0.739673	1.46543	0.329808	0.210081	0.953328	0.188514	0.976735	0.110226
0.202671	1.72007	0.741788	1.46509	0.330606	0.209616	0.955738	0.189682	0.977902	0.111334
0.203504	1.72019	0.741878	1.46521	0.3297	0.209909	0.956649	0.189946	0.978389	0.112431
0.204336	1.72034	0.744647	1.46536	0.329257	0.211354	0.955634	0.188706	0.977513	0.112812
0.205169	1.72392	0.745506	1.46894	0.32936	0.211521	0.954997	0.18926	0.975929	0.113568
0.206001	1.72761	0.746257	1.47263	0.328901	0.21247	0.954657	0.189474	0.976302	0.113153
0.206834	1.73011	0.74714	1.47513	0.328315	0.212721	0.953779	0.189759	0.977166	0.113575
0.207666	1.7348	0.747758	1.47982	0.327659	0.213906	0.953691	0.190111	0.976661	0.11345
0.208499	1.73785	0.749423	1.48287	0.326867	0.215852	0.954348	0.190649	0.977187	0.11433
0.209331	1.73975	0.748954	1.48477	0.326852	0.216301	0.954129	0.191107	0.977398	0.115885
0.210164	1.74189	0.748996	1.48691	0.327924	0.21786	0.953542	0.192693	0.977054	0.117554
0.210996	1.74568	0.749372	1.4907	0.329768	0.218717	0.953395	0.194984	0.97887	0.117574
0.211829	1.75011	0.748374	1.49513	0.329478	0.218126	0.954793	0.195951	0.980691	0.117937
0.212661	1.7565	0.75015	1.50152	0.329881	0.21903	0.957323	0.196694	0.981721	0.1179
0.213494	1.76228	0.752347	1.5073	0.331514	0.219528	0.959089	0.197498	0.98278	0.117895
0.214326	1.76812	0.752145	1.51314	0.332446	0.220603	0.962107	0.197133	0.984123	0.118106
0.215159	1.77249	0.752738	1.51751	0.331971	0.219512	0.965715	0.197654	0.987058	0.119109
0.215991	1.7776	0.753507	1.52262	0.332017	0.220446	0.969949	0.199324	0.990315	0.118588
0.216824	1.78338	0.754016	1.5284	0.331884	0.222551	0.974767	0.200374	0.993406	0.120111
0.217656	1.79094	0.755117	1.53596	0.333511	0.223204	0.979654	0.200095	0.99704	0.120732
0.218489	1.79777	0.756738	1.54279	0.333924	0.224359	0.983283	0.20007	1.00143	0.120827
0.219321	1.80594	0.758435	1.55096	0.335527	0.224347	0.986639	0.201093	1.00651	0.121016
0.220154	1.81314	0.758821	1.55816	0.336271	0.223051	0.992106	0.201883	1.00996	0.121786
0.220986	1.82143	0.759341	1.56645	0.33685	0.224051	0.999767	0.2031	1.01332	0.122683
0.221819	1.82947	0.760732	1.57449	0.337274	0.225718	1.00741	0.204448	1.01857	0.124168
0.222651	1.83803	0.761449	1.58305	0.338309	0.226911	1.0145	0.205547	1.02421	0.124344
0.223484	1.84891	0.762548	1.59393	0.339622	0.227597	1.02097	0.205419	1.03066	0.124319
0.224316	1.85822	0.763932	1.60324	0.340152	0.22926	1.02926	0.205542	1.03922	0.123831
0.225149	1.86799	0.763993	1.61301	0.339326	0.230191	1.03879	0.206958	1.04777	0.124731
0.225981	1.87819	0.764796	1.62321	0.33814	0.231047	1.04691	0.207679	1.05565	0.124744
0.226814	1.88751	0.764476	1.63253	0.338014	0.233293	1.05576	0.208061	1.06276	0.125031
0.227646	1.89575	0.765451	1.64077	0.338586	0.234447	1.06654	0.20834	1.07034	0.124713
0.228479	1.90303	0.767692	1.64805	0.340249	0.234969	1.07774	0.209057	1.0791	0.124445
0.229311	1.91054	0.768312	1.65556	0.340596	0.236411	1.08728	0.209345	1.08712	0.12339
0.230144	1.9187	0.770681	1.66372	0.341466	0.237221	1.09871	0.209716	1.09594	0.122399
0.230976	1.92684	0.770578	1.67186	0.340675	0.234905	1.11108	0.209985	1.10642	0.121748
0.231809	1.93418	0.771901	1.6792	0.340076	0.23551	1.12358	0.210553	1.11635	0.122769
0.232641	1.94126	0.77468	1.68628	0.341445	0.23757	1.13535	0.21141	1.12512	0.123773
0.233474	1.94669	0.776458	1.69171	0.343629	0.239775	1.14434	0.211823	1.13455	0.123638
0.234306	1.95147	0.778089	1.69649	0.343822	0.240705	1.15293	0.21282	1.14469	0.123453
0.235139	1.95573	0.780256	1.70075	0.344907	0.2417	1.16046	0.214674	1.15337	0.123303
0.235971	1.96081	0.783086	1.70583	0.348483	0.244947	1.16745	0.215698	1.1617	0.124236
0.236804	1.96456	0.785846	1.70958	0.353515	0.246368	1.1741	0.215231	1.17088	0.125471
0.237636	1.9688	0.789222	1.71382	0.358424	0.248063	1.1809	0.21589	1.1797	0.12479
0.238469	1.97087	0.794635	1.71589	0.364812	0.248667	1.18883	0.217217	1.18795	0.123766
0.239301	1.97296	0.800912	1.71798	0.370967	0.248652	1.19722	0.218263	1.19534	0.124093
0.240134	1.9746	0.806203	1.71962	0.379077	0.250014	1.20449	0.218764	1.20129	0.123751
0.240966	1.97589	0.813226	1.72091	0.388738	0.251687	1.20956	0.218575	1.20751	0.122924
0.241799	1.97796	0.819764	1.72298	0.39804	0.252951	1.21296	0.218406	1.21326	0.122709
0.242631	1.98047	0.826865	1.72549	0.408765	0.253897	1.21731	0.217941	1.2192	0.121487
0.243464	1.98253	0.835036	1.72755	0.42089	0.254403	1.22067	0.217543	1.22577	0.119531
0.244296	1.98416	0.843351	1.72918	0.431615	0.255899	1.22371	0.217746	1.23182	0.119359
0.245129	1.98603	0.851749	1.73105	0.444312	0.256527	1.22517	0.218721	1.23676	0.119032
0.245961	1.98911	0.85962	1.73413	0.458394	0.258432	1.22652	0.218831	1.24107	0.117483
0.246794	1.99154	0.868076	1.73656	0.474908	0.259136	1.22914	0.21867	1.2457	0.118105
0.247626	1.99323	0.877221	1.73825	0.488158	0.257699	1.23188	0.218608	1.2498	0.118607
0.248459	1.99409	0.887157	1.73911	0.503314	0.258374	1.2313	0.219651	1.25337	0.118156
0.249291	1.99521	0.896392	1.74023	0.517457	0.25916	1.22932	0.219869	1.25693	0.117936
0.250124	1.99659	0.907104	1.74161	0.532266	0.260388	1.2294	0.219766	1.26152	0.118659
0.250956	1.99844	0.916763	1.74346	0.546542	0.262092	1.23062	0.219391	1.26622	0.120153
0.251788	2.00065	0.927295	1.74567	0.562442	0.26351	1.23017	0.21827	1.26958	0.120776
0.252621	2.00263	0.936616	1.74765	0.579293	0.265248	1.22889	0.217512	1.27277	0.120994
0.253453	2.00589	0.945094	1.75091	0.596635	0.265469	1.22701	0.21755	1.27622	0.121551
0.254286	2.00804	0.953761	1.75306	0.61184	0.266453	1.22503	0.218173	1.27756	0.121625
0.255118	2.0094	0.962051	1.75442	0.628732	0.26728	1.22466	0.218126	1.27823	0.122263
0.255951	2.01078	0.971814	1.7558	0.644927	0.268195	1.22475	0.217908	1.28039	0.124388
0.256783	2.0132	0.978759	1.75822	0.660911	0.267522	1.22528	0.217835	1.28171	0.124885
0.257616	2.01568	0.987733	1.7607	0.67459	0.266775	1.22452	0.218309	1.28095	0.12602
0.258448	2.01744	0.995248	1.76246	0.689206	0.268163	1.22311	0.218243	1.28018	0.128187
0.259281	2.02014	1.00009	1.76516	0.700671	0.269763	1.22192	0.218009	1.27917	0.131645
0.260113	2.02182	1.00488	1.76684	0.712566	0.270701	1.22063	0.217954	1.27902	0.133394
0.260946	2.02346	1.01039	1.76848	0.722057	0.271382	1.21868	0.21851	1.28039	0.137072
0.261778	2.02583	1.01535	1.77085	0.733051	0.271788	1.21788	0.219969	1.28035	0.141503
0.262611	2.02668	1.01864	1.7717	0.740894	0.27345	1.21726	0.220435	1.28051	0.145117
0.263443	2.02722	1.02136	1.77224	0.748935	0.273583	1.21642	0.220939	1.28088	0.149711
0.264276	2.0271	1.02424	1.77212	0.756244	0.274892	1.21639	0.221434	1.28038	0.155867
0.265108	2.02846	1.02637	1.77348	0.762765	0.275395	1.21621	0.222297	1.27898	0.160959
0.265941	2.02956	1.02924	1.77458	0.769386	0.277466	1.21605	0.222393	1.27713	0.166657
0.266773	2.02926	1.0311	1.77428	0.773984	0.276425	1.21503	0.222377	1.27674	0.173233
0.267606	2.02917	1.0327	1.77419	0.777179	0.276085	1.2132	0.222741	1.2767	0.176772
0.268438	2.03109	1.03358	1.77611	0.783334	0.277817	1.20968	0.223768	1.27554	0.182054
0.269271	2.0344	1.03289	1.77942	0.787234	0.277207	1.2061	0.224394	1.27383	0.188924
0.270103	2.03623	1.03227	1.78125	0.79057	0.277212	1.20228	0.224088	1.27209	0.195294
0.270936	2.03651	1.03095	1.78153	0.794927	0.277398	1.19912	0.223163	1.27147	0.200397
0.271768	2.0372	1.03005	1.78222	0.79783	0.278069	1.19515	0.223116	1.27147	0.204835
0.272601	2.03592	1.03023	1.78094	0.800237	0.280576	1.19299	0.223974	1.27012	0.209465
0.273433	2.0357	1.02984	1.78072	0.803018	0.280411	1.19071	0.224086	1.2677	0.21417
0.274266	2.03581	1.02953	1.78083	0.804485	0.282288	1.1872	0.224383	1.26574	0.218765
0.275098	2.03636	1.02921	1.78138	0.807418	0.282237	1.18423	0.224287	1.26504	0.224451
0.275931	2.03695	1.02906	1.78197	0.809549	0.28308	1.17986	0.22371	1.26398	0.230184
0.276763	2.03796	1.02846	1.78298	0.811975	0.282788	1.17584	0.222614	1.26215	0.234358
0.277596	2.03863	1.0296	1.78365	0.81401	0.28367	1.1723	0.222247	1.26079	0.238649
0.278428	2.0401	1.02923	1.78512	0.81578	0.284473	1.17007	0.222626	1.2597	0.243463
0.279261	2.04029	1.02962	1.78531	0.816661	0.282866	1.16643	0.22345	1.25882	0.247958
0.280093	2.03842	1.0289	1.78344	0.817392	0.281922	1.16155	0.223481	1.25768	0.251259
0.280926	2.03844	1.02748	1.78346	0.818006	0.282336	1.15779	0.2231	1.25537	0.254779
0.281758	2.03779	1.027	1.78281	0.819083	0.282075	1.15508	0.223146	1.25227	0.256563
0.282591	2.03768	1.02529	1.7827	0.818828	0.282307	1.15142	0.22254	1.25016	0.257705
0.283423	2.03806	1.02547	1.78308	0.821462	0.282444	1.14849	0.222765	1.24823	0.259633
0.284256	2.03686	1.02488	1.78188	0.822486	0.284647	1.14473	0.222964	1.24551	0.261092
0.285088	2.03632	1.02415	1.78133	0.823251	0.284082	1.14126	0.223202	1.24175	0.263303
0.285921	2.03544	1.02393	1.78046	0.824228	0.283776	1.13889	0.223841	1.23872	0.264536
0.286753	2.037	1.02358	1.78202	0.824613	0.282315	1.13714	0.224041	1.23661	0.265169
0.287586	2.03696	1.02367	1.78198	0.825965	0.282561	1.13497	0.224529	1.23461	0.264703
0.288418	2.03565	1.02303	1.78066	0.828162	0.283441	1.13182	0.224464	1.23321	0.264989
0.289251	2.03415	1.02215	1.77917	0.82812	0.284618	1.12976	0.224106	1.23218	0.264327
0.290083	2.0342	1.02202	1.77922	0.828033	0.287672	1.12829	0.223924	1.231	0.26356
0.290916	2.03432	1.02268	1.77934	0.826547	0.2882	1.12896	0.224448	1.22962	0.262931
0.291748	2.03513	1.02235	1.78015	0.825483	0.287849	1.12759	0.225432	1.22601	0.26292
0.292581	2.03417	1.02178	1.77919	0.826751	0.287642	1.12481	0.225688	1.22065	0.263339
0.293413	2.03435	1.02105	1.77937	0.826957	0.288214	1.12207	0.225961	1.21733	0.264173
0.294246	2.03469	1.02061	1.77971	0.825984	0.289849	1.11736	0.227103	1.21442	0.264442
0.295078	2.03517	1.02	1.78019	0.825975	0.290064	1.11431	0.227139	1.2119	0.264968
0.295911	2.03536	1.01935	1.78038	0.82491	0.291014	1.11232	0.227488	1.21007	0.265323
0.296743	2.03557	1.01791	1.78059	0.822726	0.292399	1.11132	0.229883	1.20685	0.265226
0.297576	2.03423	1.01837	1.77925	0.821454	0.29372	1.10966	0.232486	1.20304	0.26536
0.298408	2.03346	1.01823	1.77848	0.817945	0.293945	1.10796	0.233878	1.19882	0.265264
0.299241	2.03246	1.01734	1.77748	0.815808	0.29408	1.1061	0.234429	1.1952	0.264308
0.300073	2.03352	1.01572	1.77854	0.813884	0.294059	1.10414	0.234547	1.19274	0.264083
0.300906	2.03373	1.0166	1.77875	0.813558	0.294976	1.10307	0.234928	1.19066	0.264629
0.301738	2.03324	1.01568	1.77826	0.812658	0.295624	1.09997	0.23596	1.18855	0.264339
0.302571	2.03382	1.01314	1.77884	0.812465	0.296792	1.09663	0.236651	1.1872	0.264275
0.303403	2.03496	1.01356	1.77998	0.811134	0.298028	1.09462	0.237694	1.18501	0.264384
0.304236	2.03632	1.01293	1.78134	0.808185	0.298236	1.09119	0.239242	1.18137	0.263692
0.305068	2.03826	1.0132	1.78328	0.805497	0.296706	1.08796	0.240504	1.17828	0.264102
0.305901	2.0396	1.01261	1.78462	0.803992	0.297354	1.08565	0.24145	1.1762	0.261678
0.306733	2.04027	1.01127	1.7853	0.801725	0.29896	1.08201	0.24224	1.17391	0.261125
0.307566	2.03906	1.00892	1.78408	0.799745	0.300785	1.07836	0.243093	1.1699	0.260856
0.308398	2.03929	1.00831	1.78431	0.796317	0.302023	1.07492	0.244233	1.16677	0.26115
0.309231	2.03844	1.00919	1.78346	0.792487	0.303881	1.07381	0.246275	1.16355	0.260612
0.310063	2.03823	1.01	1.78325	0.790874	0.304746	1.07238	0.24851	1.16105	0.261046
0.310896	2.03703	1.00996	1.78205	0.789535	0.304716	1.06977	0.250251	1.15957	0.260872
0.311728	2.03685	1.00974	1.78187	0.789716	0.306555	1.06698	0.252236	1.15766	0.259605
0.312561	2.03696	1.01016	1.78198	0.789226	0.308955	1.06385	0.254643	1.15451	0.258586
0.313393	2.0378	1.00963	1.78282	0.787065	0.310336	1.05978	0.25745	1.15157	0.25753
0.314226	2.03713	1.00944	1.78215	0.785815	0.311497	1.05584	0.260141	1.14908	0.256746
0.315058	2.0373	1.00906	1.78232	0.783427	0.311804	1.0539	0.262732	1.1472	0.255734
0.315891	2.03796	1.00865	1.78298	0.779948	0.311078	1.05131	0.266657	1.14565	0.254584
0.316723	2.03827	1.00885	1.78329	0.778121	0.310944	1.0493	0.270892	1.14289	0.252567
0.317556	2.03806	1.00872	1.78308	0.775556	0.310724	1.04651	0.273822	1.14165	0.250161
0.318388	2.03904	1.00766	1.78406	0.771579	0.31038	1.04419	0.277021	1.14091	0.248577
0.319221	2.03979	1.00658	1.78481	0.768773	0.312065	1.04037	0.280711	1.13914	0.248289
0.320053	2.03991	1.00498	1.78493	0.76636	0.314094	1.03691	0.28459	1.1377	0.247622
0.320886	2.03866	1.00461	1.78368	0.762407	0.315795	1.03432	0.289123	1.13534	0.246598
0.321718	2.03826	1.00244	1.78329	0.75843	0.317458	1.03263	0.294937	1.13256	0.245319
0.322551	2.03857	1.00203	1.7836	0.754619	0.321317	1.03407	0.300753	1.13071	0.244381
0.323383	2.03746	1.0025	1.78248	0.750619	0.325401	1.0332	0.306102	1.12908	0.243727
0.324216	2.03531	1.00148	1.78033	0.746848	0.329727	1.03017	0.311316	1.12821	0.242392
0.325048	2.03462	1.00073	1.77964	0.743833	0.332946	1.02908	0.316496	1.12804	0.241107
0.325881	2.03512	1.00034	1.78014	0.740884	0.337309	1.02827	0.322521	1.12696	0.239183
0.326713	2.03547	0.999671	1.78049	0.738658	0.34248	1.02651	0.329069	1.12562	0.239555
0.327546	2.03463	0.998872	1.77965	0.736959	0.345874	1.02521	0.334858	1.12353	0.239599
0.328378	2.03377	0.998441	1.77879	0.736373	0.347921	1.02354	0.340338	1.12276	0.239807
0.329211	2.03259	0.997998	1.77761	0.73546	0.349662	1.02197	0.34559	1.12078	0.239291
0.330043	2.03259	0.995954	1.77761	0.734725	0.350807	1.02056	0.350217	1.11815	0.239728
0.330876	2.03276	0.9938	1.77778	0.73302	0.351272	1.01818	0.354496	1.11373	0.239842
0.331708	2.03291	0.991851	1.77793	0.730319	0.352409	1.01672	0.359392	1.10961	0.238734
0.332541	2.03228	0.990108	1.7773	0.726768	0.35354	1.01553	0.364544	1.10689	0.237684
0.333373	2.03204	0.990379	1.77706	0.721669	0.353776	1.01453	0.368875	1.10528	0.236724
0.334206	2.03298	0.989412	1.778	0.71757	0.356529	1.01598	0.372467	1.10439	0.235634
0.335038	2.03463	0.989103	1.77965	0.712484	0.358318	1.01556	0.375363	1.10286	0.235012
0.335871	2.03424	0.989371	1.77926	0.709111	0.360104	1.01401	0.378389	1.10014	0.235017
0.336703	2.03394	0.989227	1.77896	0.706477	0.36238	1.01403	0.381732	1.09859	0.234073
0.337536	2.03396	0.988298	1.77898	0.702134	0.36411	1.01263	0.384763	1.09642	0.233464
0.338368	2.03529	0.988179	1.78031	0.697782	0.364125	1.01147	0.387668	1.09401	0.234228
0.339201	2.03569	0.987001	1.78071	0.695039	0.367052	1.00963	0.389685	1.09195	0.234756
0.340033	2.03518	0.985656	1.78019	0.693204	0.369041	1.00839	0.39231	1.09187	0.233737
0.340866	2.0345	0.984695	1.77952	0.691091	0.370125	1.00647	0.395087	1.09091	0.232335
0.341698	2.03595	0.984103	1.78097	0.689492	0.371771	1.00483	0.397162	1.08953	0.231379
0.342531	2.03772	0.98437	1.78274	0.68708	0.373428	1.0024	0.397577	1.08764	0.229865
0.343363	2.03828	0.984397	1.7833	0.68403	0.372193	0.998746	0.398025	1.08725	0.229783
0.344196	2.0414	0.98401	1.78642	0.67991	0.369385	0.996416	0.399682	1.0856	0.229391
0.345028	2.0442	0.98475	1.78923	0.676856	0.36677	0.996106	0.401066	1.08266	0.229101
0.345861	2.04437	0.984557	1.78939	0.673757	0.364567	0.994525	0.401374	1.08038	0.229466
0.346693	2.04358	0.982972	1.7886	0.671079	0.361994	0.993321	0.401487	1.07731	0.229471
0.347526	2.04341	0.98253	1.78843	0.666597	0.358926	0.991381	0.401232	1.07361	0.228883
0.348358	2.04468	0.981925	1.7897	0.662864	0.356874	0.98974	0.401666	1.07344	0.228462
0.349191	2.04724	0.982333	1.79226	0.657365	0.355724	0.988652	0.402657	1.07407	0.227776
0.350023	2.04938	0.980651	1.7944	0.653104	0.354994	0.98691	0.402855	1.07384	0.22702
0.350856	2.05103	0.979802	1.79605	0.649074	0.354142	0.984226	0.403425	1.07391	0.226046
0.351688	2.05051	0.980104	1.79553	0.646331	0.353311	0.982946	0.403765	1.07437	0.225678
0.352521	2.05004	0.980754	1.79506	0.644126	0.352067	0.982002	0.403108	1.07427	0.225372
0.353353	2.05036	0.979938	1.79538	0.641168	0.350054	0.97956	0.402651	1.07393	0.226442
0.354186	2.05042	0.97775	1.79544	0.63915	0.348073	0.977962	0.403591	1.07303	0.227812
0.355018	2.04991	0.9789	1.79493	0.637346	0.345241	0.975135	0.404617	1.07354	0.228457
0.355851	2.0499	0.977586	1.79492	0.636792	0.341707	0.972812	0.405937	1.07175	0.227678
0.356683	2.05066	0.976968	1.79568	0.634217	0.338914	0.971934	0.406556	1.07068	0.227416
0.357516	2.04983	0.975871	1.79485	0.631437	0.33751	0.970221	0.405115	1.06895	0.227412
0.358348	2.04961	0.975063	1.79462	0.628057	0.336359	0.968838	0.403865	1.06713	0.227483
0.359181	2.04943	0.974458	1.79445	0.626403	0.336622	0.966809	0.403533	1.06572	0.226275
0.360013	2.04996	0.974326	1.79498	0.624849	0.33568	0.965645	0.403633	1.06493	0.224554
0.360846	2.05	0.97388	1.79502	0.622577	0.333046	0.965944	0.403595	1.06106	0.22368
0.361678	2.05052	0.973823	1.79554	0.6202	0.330245	0.965706	0.403308	1.05932	0.224234
0.362511	2.04891	0.97277	1.79393	0.617107	0.329463	0.964827	0.402898	1.05786	0.22454
0.363343	2.04821	0.972364	1.79323	0.615447	0.32863	0.964972	0.402985	1.05693	0.225517
0.364176	2.04825	0.971833	1.79327	0.61424	0.328364	0.96492	0.403963	1.05426	0.225791
0.365008	2.04681	0.971845	1.79183	0.614043	0.330696	0.966301	0.4034	1.05204	0.22565
0.365841	2.04554	0.970424	1.79056	0.611901	0.332324	0.966722	0.40259	1.05263	0.225781
0.366673	2.04455	0.970376	1.78957	0.60991	0.334121	0.96656	0.402728	1.05223	0.225021
0.367506	2.04414	0.970834	1.78916	0.607839	0.337122	0.963953	0.40247	1.05258	0.224437
0.368338	2.04417	0.970348	1.78919	0.60583	0.340412	0.961548	0.402171	1.05398	0.225124
0.369171	2.04433	0.970859	1.78935	0.603246	0.343819	0.960896	0.400733	1.0518	0.224652
0.370003	2.04448	0.970535	1.7895	0.600406	0.348736	0.958267	0.399879	1.04943	0.22326
0.370836	2.04396	0.970926	1.78898	0.599912	0.354225	0.957059	0.400765	1.04734	0.222268
0.371668	2.04282	0.970454	1.78784	0.598348	0.361134	0.955233	0.401136	1.04529	0.222151
0.372501	2.04308	0.970094	1.7881	0.594175	0.369478	0.952266	0.401411	1.04436	0.222374
0.373333	2.04309	0.969781	1.78811	0.591008	0.379092	0.952021	0.401341	1.04332	0.22287
0.374166	2.04269	0.970111	1.78771	0.590228	0.389321	0.950635	0.400223	1.04259	0.222974
0.374998	2.04248	0.970842	1.7875	0.58821	0.39986	0.949988	0.399088	1.0426	0.222597
0.375831	2.0416	0.9691	1.78662	0.586024	0.409668	0.950556	0.399147	1.04135	0.223049
0.376663	2.04073	0.969669	1.78575	0.58335	0.420867	0.951841	0.398233	1.04197	0.223924
0.377496	2.04108	0.970021	1.78611	0.582504	0.431569	0.952161	0.397074	1.04197	0.22347
0.378328	2.04196	0.969756	1.78698	0.581845	0.44175	0.952075	0.397695	1.04135	0.223605
0.379161	2.04154	0.968251	1.78655	0.581708	0.452765	0.951777	0.397878	1.04157	0.223437
0.379993	2.04145	0.967273	1.78647	0.57941	0.464059	0.952105	0.397124	1.03926	0.223805
0.380826	2.04142	0.966064	1.78644	0.578452	0.474732	0.952212	0.396607	1.03729	0.225095
0.381658	2.04187	0.966846	1.78689	0.576148	0.485522	0.95097	0.395548	1.03807	0.226024
0.382491	2.04125	0.966418	1.78627	0.573392	0.498616	0.95086	0.394131	1.03651	0.225091
0.383323	2.04028	0.96631	1.7853	0.573396	0.509749	0.951238	0.39381	1.03534	0.22406
0.384156	2.03974	0.966033	1.78476	0.570975	0.520467	0.949761	0.39309	1.03537	0.223136
0.384988	2.03916	0.966123	1.78418	0.569268	0.531196	0.948192	0.392298	1.03429	0.222368
0.385821	2.03887	0.96515	1.78389	0.567331	0.540108	0.944602	0.39262	1.03367	0.222334
0.386653	2.03896	0.963899	1.78398	0.565629	0.550139	0.942138	0.39184	1.03286	0.222011
0.387486	2.0398	0.963073	1.78482	0.565244	0.560297	0.940596	0.390751	1.03286	0.222326
0.388318	2.04027	0.961742	1.78529	0.565074	0.569288	0.940148	0.38978	1.03275	0.222486
0.389151	2.04081	0.961538	1.78583	0.563823	0.577269	0.939487	0.388323	1.03194	0.220926
0.389983	2.04141	0.959571	1.78643	0.562514	0.584909	0.937699	0.388109	1.03185	0.220497
0.390816	2.03934	0.959064	1.78436	0.560676	0.591842	0.937486	0.387072	1.03015	0.221468
0.391648	2.03869	0.958413	1.78371	0.557885	0.59943	0.938341	0.384724	1.02915	0.222208
0.392481	2.04049	0.957437	1.78551	0.554523	0.606152	0.939195	0.382663	1.02812	0.221781
0.393313	2.04037	0.955648	1.78539	0.553146	0.610274	0.94055	0.381251	1.02862	0.220616
0.394146	2.03939	0.954848	1.78442	0.552528	0.61203	0.939263	0.380574	1.02873	0.218904
0.394978	2.03956	0.953588	1.78458	0.550073	0.613583	0.937787	0.380315	1.02752	0.21658
0.395811	2.04039	0.95251	1.78541	0.548791	0.614833	0.937462	0.380002	1.02775	0.214999
0.396643	2.04195	0.952638	1.78697	0.547548	0.616512	0.93502	0.379419	1.02727	0.213365
0.397476	2.04346	0.951816	1.78848	0.546647	0.617226	0.930836	0.379884	1.02581	0.211714
0.398308	2.04313	0.950751	1.78815	0.544561	0.619037	0.928479	0.380571	1.02442	0.210846
0.399141	2.04147	0.950731	1.78649	0.542127	0.620058	0.926847	0.380076	1.02361	0.20944
0.399973	2.04161	0.950834	1.78663	0.540042	0.621306	0.926062	0.378933	1.02221	0.20799
0.400806	2.04208	0.952207	1.7871	0.539272	0.62135	0.925809	0.378004	1.02508	0.207188
0.401638	2.04151	0.953098	1.78653	0.536449	0.621424	0.924453	0.377391	1.0276	0.206534
0.402471	2.04152	0.951114	1.78654	0.535033	0.622476	0.924307	0.376866	1.02721	0.206622
0.403303	2.0433	0.950927	1.78832	0.534963	0.622778	0.922899	0.376591	1.02792	0.206544
0.404136	2.04522	0.952245	1.79024	0.532071	0.622981	0.921375	0.374504	1.02768	0.205631
0.404968	2.04715	0.952373	1.79217	0.530975	0.622548	0.922328	0.372485	1.02652	0.204847
0.405801	2.04934	0.951644	1.79436	0.529401	0.621843	0.921252	0.369907	1.02551	0.204036
0.406633	2.05045	0.950793	1.79547	0.527208	0.621445	0.91984	0.367037	1.0245	0.20333
0.407466	2.05155	0.950687	1.79657	0.526296	0.620609	0.919076	0.365985	1.02223	0.20269
0.408298	2.05228	0.951381	1.7973	0.524842	0.618879	0.918667	0.365121	1.02093	0.201516
0.409131	2.05178	0.951606	1.7968	0.522514	0.617442	0.917789	0.363285	1.02012	0.201078
0.409963	2.05086	0.950418	1.79588	0.519998	0.616487	0.917342	0.362418	1.0202	0.200846
0.410796	2.04929	0.950002	1.79431	0.519105	0.61592	0.915675	0.361759	1.02066	0.200493
0.411628	2.04926	0.949683	1.79428	0.51942	0.614287	0.914216	0.361597	1.02095	0.200233
0.412461	2.05036	0.949069	1.79538	0.518106	0.610939	0.912865	0.361922	1.02003	0.199694
0.413293	2.04981	0.950629	1.79483	0.518132	0.607141	0.912603	0.362248	1.01964	0.199249
0.414126	2.05019	0.951961	1.79521	0.516555	0.605516	0.911941	0.362055	1.0179	0.198807
0.414958	2.0509	0.951812	1.79591	0.514455	0.604518	0.909719	0.361669	1.01754	0.199143
0.415791	2.05049	0.95181	1.79551	0.513246	0.603591	0.909437	0.36109	1.01866	0.200211
0.416623	2.05059	0.951816	1.79561	0.512199	0.603549	0.907925	0.361062	1.01762	0.200613
0.417456	2.05006	0.950772	1.79508	0.512084	0.601535	0.907346	0.360645	1.01604	0.200417
0.418288	2.05002	0.950261	1.79504	0.510204	0.600601	0.908624	0.359206	1.0164	0.200231
0.419121	2.05109	0.950107	1.79611	0.50883	0.599971	0.908895	0.357137	1.01486	0.20031
0.419953	2.05282	0.949704	1.79784	0.506768	0.598202	0.909194	0.355729	1.01512	0.200676
0.420786	2.05508	0.950072	1.8001	0.506282	0.595366	0.90821	0.355025	1.01512	0.201654
0.421618	2.05582	0.949159	1.80084	0.506519	0.592659	0.90501	0.355016	1.01317	0.202526
0.422451	2.05666	0.947272	1.80168	0.505353	0.590022	0.904776	0.3541	1.01072	0.202165
0.423283	2.05775	0.946809	1.80277	0.504569	0.587728	0.903774	0.352917	1.00951	0.200827
0.424116	2.05865	0.947038	1.80367	0.502374	0.58519	0.904251	0.352408	1.00813	0.200015
0.424948	2.06017	0.946149	1.80519	0.501857	0.58262	0.90466	0.353308	1.00654	0.201055
0.425781	2.0599	0.944625	1.80492	0.501165	0.581721	0.904154	0.354144	1.0044	0.202093
0.426613	2.05837	0.944389	1.80339	0.499892	0.58095	0.904431	0.354632	1.0039	0.201458
0.427446	2.05752	0.945653	1.80254	0.500179	0.580659	0.904384	0.354042	1.00401	0.200031
0.428278	2.05711	0.946849	1.80213	0.49804	0.578655	0.906147	0.353168	1.00439	0.199414
0.429111	2.05713	0.945789	1.80215	0.49673	0.577253	0.905246	0.352829	1.00422	0.198584
0.429943	2.05758	0.946061	1.8026	0.495868	0.576613	0.905525	0.353781	1.00256	0.198234
0.430776	2.05746	0.947866	1.80248	0.494291	0.573967	0.907665	0.354834	1.00103	0.199212
0.431608	2.05727	0.948148	1.80229	0.492767	0.571725	0.909057	0.354725	0.999735	0.198816
0.432441	2.05848	0.946809	1.8035	0.490245	0.569849	0.909291	0.354505	0.998966	0.197183
0.433273	2.05835	0.948207	1.80337	0.490041	0.567552	0.908332	0.354895	0.99994	0.196573
0.434106	2.05764	0.949331	1.80266	0.489246	0.566531	0.90821	0.354756	0.99988	0.19668
0.434938	2.05836	0.948266	1.80338	0.487971	0.565529	0.908796	0.354802	0.999184	0.196478
0.435771	2.05957	0.948722	1.80459	0.48698	0.564648	0.909594	0.35429	0.997928	0.195971
0.436603	2.06006	0.94954	1.80508	0.486737	0.563764	0.910353	0.353528	0.996246	0.195478
0.437436	2.05917	0.948575	1.80419	0.486209	0.561727	0.910205	0.351898	0.995957	0.195353
0.438268	2.05933	0.948817	1.80435	0.482942	0.561768	0.9083	0.350043	0.996402	0.196026
0.439101	2.05994	0.94851	1.80496	0.481916	0.561636	0.906337	0.349124	0.99487	0.197055
0.439933	2.05945	0.94786	1.80447	0.481757	0.560524	0.907093	0.348859	0.994847	0.197146
0.440766	2.05933	0.947089	1.80435	0.482175	0.56077	0.905531	0.348699	0.992104	0.196648
0.441598	2.05862	0.94519	1.80364	0.480912	0.560653	0.905529	0.349204	0.991701	0.195642
0.442431	2.05746	0.944127	1.80248	0.480302	0.560775	0.906008	0.34957	0.99182	0.194539
0.443263	2.05661	0.945296	1.80163	0.480046	0.561221	0.904088	0.349888	0.990762	0.193943
0.444096	2.05566	0.944812	1.80068	0.478891	0.561602	0.900719	0.349664	0.990286	0.193542
0.444928	2.05467	0.94468	1.79969	0.477796	0.562067	0.896173	0.348875	0.990761	0.193566
0.445761	2.05317	0.943725	1.79819	0.477914	0.562251	0.894175	0.347437	0.990806	0.192217
0.446593	2.05423	0.943931	1.79925	0.475934	0.561244	0.892069	0.347194	0.990819	0.190389
0.447426	2.05602	0.943896	1.80104	0.475335	0.560185	0.891149	0.347836	0.990889	0.189996
0.448258	2.05638	0.942964	1.8014	0.474612	0.557492	0.893344	0.348375	0.989869	0.190983
0.449091	2.05592	0.941543	1.80094	0.4754	0.557555	0.89142	0.348726	0.989999	0.191987
0.449923	2.05512	0.94102	1.80014	0.474094	0.557115	0.890973	0.348462	0.989734	0.192838
0.450756	2.05572	0.939731	1.80073	0.473512	0.555694	0.890362	0.348163	0.990359	0.192392
0.451588	2.05664	0.9377	1.80166	0.47413	0.555749	0.887044	0.347329	0.990999	0.190378
0.452421	2.05724	0.937501	1.80226	0.474155	0.554884	0.886296	0.346638	0.99082	0.190284
0.453253	2.05673	0.938998	1.80175	0.474054	0.55508	0.886701	0.345708	0.990416	0.191078
0.454085	2.05637	0.93736	1.80139	0.47346	0.556812	0.885997	0.345056	0.989576	0.190931
0.454918	2.05628	0.934772	1.8013	0.473085	0.55703	0.883705	0.344542	0.988484	0.190286
0.45575	2.05607	0.934482	1.80109	0.472682	0.555762	0.882436	0.343539	0.988587	0.188971
0.456583	2.0561	0.933213	1.80112	0.472003	0.555276	0.881367	0.343546	0.98755	0.188528
0.457415	2.05649	0.932565	1.80151	0.471961	0.554549	0.878102	0.343073	0.988208	0.189441
0.458248	2.05795	0.932897	1.80297	0.471812	0.554627	0.877415	0.342847	0.986819	0.189411
0.45908	2.05935	0.932441	1.80437	0.472375	0.553395	0.87826	0.342878	0.984927	0.187675
0.459913	2.05926	0.9313	1.80428	0.472291	0.551617	0.877956	0.34274	0.983192	0.185124
0.460745	2.06005	0.93056	1.80506	0.470266	0.551215	0.87496	0.342137	0.983641	0.183491
0.461578	2.06153	0.930574	1.80655	0.469245	0.55078	0.873476	0.342284	0.983852	0.18282
0.46241	2.06141	0.931865	1.80643	0.470025	0.550765	0.873102	0.342335	0.983054	0.182623
0.463243	2.06294	0.932277	1.80796	0.468686	0.550528	0.872717	0.340886	0.980867	0.181726
0.464075	2.06538	0.932025	1.8104	0.467527	0.550253	0.873162	0.339817	0.979772	0.180803
0.464908	2.06639	0.93344	1.81141	0.468215	0.549785	0.875351	0.340605	0.981148	0.181002
0.46574	2.06644	0.933337	1.81146	0.469157	0.54897	0.878441	0.341144	0.978356	0.181007
0.466573	2.06651	0.933732	1.81153	0.467452	0.548236	0.880898	0.341756	0.978088	0.180206
0.467405	2.06518	0.934341	1.8102	0.467527	0.547599	0.881888	0.341327	0.978557	0.179887
0.468238	2.06473	0.933595	1.80975	0.465823	0.546962	0.881396	0.34045	0.977141	0.180022
0.46907	2.06588	0.932979	1.8109	0.4644	0.548362	0.877819	0.340403	0.976993	0.179318
0.469903	2.0653	0.932218	1.81032	0.463304	0.54785	0.877195	0.341026	0.975967	0.178126
0.470735	2.06474	0.932538	1.80976	0.462245	0.548727	0.875297	0.342062	0.97428	0.177494
0.471568	2.06398	0.932645	1.809	0.460494	0.550541	0.873645	0.34254	0.973712	0.177941
0.4724	2.0636	0.933	1.80862	0.46001	0.55155	0.872897	0.342332	0.97335	0.178196
0.473233	2.06437	0.933969	1.80939	0.459998	0.553255	0.8724	0.342842	0.972502	0.177853
0.474065	2.06375	0.93304	1.80877	0.461261	0.553393	0.870527	0.342884	0.972863	0.177296
0.474898	2.06297	0.932357	1.80799	0.461312	0.552811	0.869602	0.34195	0.972283	0.177608
0.47573	2.06313	0.933273	1.80815	0.459401	0.551983	0.868433	0.341402	0.974264	0.178761
0.476563	2.06391	0.934211	1.80893	0.459445	0.551288	0.865497	0.341723	0.973997	0.180031
0.477395	2.06403	0.935359	1.80905	0.458715	0.550352	0.866004	0.340962	0.973921	0.179681
0.478228	2.06494	0.935744	1.80996	0.457805	0.549649	0.868418	0.341691	0.972037	0.177763
0.47906	2.06445	0.934831	1.80947	0.456565	0.549281	0.868195	0.342673	0.972005	0.176969
0.479893	2.06238	0.933709	1.8074	0.456891	0.549567	0.868416	0.342744	0.971462	0.176681
0.480725	2.06219	0.933669	1.80721	0.457748	0.550066	0.868851	0.343625	0.971453	0.176893
0.481558	2.062	0.935209	1.80702	0.458358	0.549071	0.871402	0.345595	0.970504	0.176899
0.48239	2.06088	0.936176	1.8059	0.458236	0.548067	0.873487	0.346625	0.970286	0.176279
0.483223	2.06057	0.936805	1.80559	0.455882	0.548133	0.873639	0.346413	0.969793	0.176194
0.484055	2.05916	0.936763	1.80418	0.454944	0.548191	0.873386	0.348455	0.970248	0.17643
0.484888	2.05832	0.935641	1.80334	0.45481	0.547663	0.871885	0.349528	0.970713	0.176066
0.48572	2.05819	0.935094	1.80321	0.454314	0.548066	0.871819	0.349552	0.967738	0.175586
0.486553	2.05881	0.934562	1.80383	0.454072	0.547862	0.86948	0.350022	0.968768	0.175235
0.487385	2.05989	0.935041	1.80491	0.454482	0.546691	0.867704	0.350635	0.969452	0.175131
0.488218	2.06099	0.934188	1.80601	0.454738	0.546619	0.867338	0.351209	0.97016	0.174928
0.48905	2.0606	0.933337	1.80562	0.454637	0.547033	0.867134	0.350939	0.973327	0.174654
0.489883	2.05895	0.934207	1.80397	0.454473	0.546714	0.868215	0.351061	0.973382	0.175032
0.490715	2.05921	0.934324	1.80423	0.453588	0.546838	0.867254	0.350888	0.97325	0.175225
0.491548	2.06024	0.933404	1.80526	0.453744	0.544686	0.867249	0.3508	0.971609	0.175157
0.49238	2.06067	0.933025	1.80569	0.453525	0.542313	0.868019	0.35084	0.971307	0.174277
0.493213	2.06094	0.932397	1.80596	0.451966	0.540544	0.868063	0.350886	0.969966	0.173441
0.494045	2.06026	0.93135	1.80528	0.450246	0.538721	0.866586	0.350481	0.970791	0.172453
0.494878	2.06111	0.931142	1.80613	0.448055	0.537681	0.867685	0.351538	0.970263	0.171976
0.49571	2.06283	0.931518	1.80785	0.445377	0.537278	0.867597	0.352121	0.970649	0.171177
0.496543	2.06332	0.930251	1.80834	0.446073	0.537596	0.867092	0.352678	0.969046	0.17024
0.497375	2.06224	0.929288	1.80726	0.445783	0.53828	0.867703	0.353196	0.967784	0.170188
0.498208	2.06159	0.928001	1.80661	0.445161	0.539225	0.865406	0.354415	0.967561	0.169427
0.49904	2.06037	0.926578	1.80539	0.44497	0.539308	0.863074	0.35487	0.96629	0.1693
0.499873	2.06047	0.927016	1.80549	0.443841	0.538879	0.862315	0.354882	0.964938	0.169331
0.500705	2.06153	0.928552	1.80655	0.443092	0.538835	0.86095	0.355285	0.964854	0.170175
0.501538	2.06	0.928991	1.80502	0.441793	0.53824	0.860099	0.355824	0.965125	0.171083
0.50237	2.05891	0.927293	1.80393	0.439752	0.538468	0.857005	0.355233	0.964082	0.170641
0.503203	2.05803	0.925266	1.80305	0.438834	0.53886	0.856352	0.35405	0.963902	0.170088
0.504035	2.05837	0.923669	1.80339	0.438377	0.538454	0.854704	0.354419	0.965309	0.169727
0.504868	2.05889	0.921869	1.80391	0.437181	0.537612	0.85636	0.35371	0.965128	0.169491
0.5057	2.05838	0.921472	1.8034	0.437038	0.53677	0.856355	0.352463	0.965995	0.169801
0.506533	2.05855	0.920627	1.80357	0.435041	0.535531	0.856362	0.352439	0.966177	0.169975
0.507365	2.05821	0.920181	1.80323	0.434344	0.535289	0.858837	0.352655	0.966915	0.170215
0.508198	2.05725	0.918489	1.80227	0.433152	0.535722	0.856961	0.352189	0.966712	0.170293
0.50903	2.05606	0.91899	1.80108	0.432468	0.534117	0.855719	0.351866	0.96573	0.169338
0.509863	2.05539	0.918552	1.80041	0.432077	0.532073	0.854738	0.35222	0.962566	0.168076
0.510695	2.055	0.917136	1.80002	0.431806	0.531103	0.854474	0.352186	0.962088	0.166818
0.511528	2.05478	0.917087	1.7998	0.431377	0.530733	0.855008	0.351754	0.962029	0.165635
0.51236	2.05544	0.916656	1.80045	0.431016	0.530762	0.856741	0.350399	0.962988	0.16398
0.513193	2.05656	0.916024	1.80158	0.429792	0.530092	0.858469	0.35012	0.961393	0.162546
0.514025	2.05696	0.916888	1.80198	0.429935	0.529268	0.85898	0.350512	0.961761	0.162026
0.514858	2.05685	0.917611	1.80187	0.43057	0.528469	0.860199	0.349516	0.959312	0.161369
0.51569	2.05757	0.917793	1.80259	0.431516	0.528309	0.860767	0.348626	0.958621	0.1609
0.516523	2.05721	0.917621	1.80223	0.431588	0.52683	0.862035	0.348784	0.957319	0.16082
0.517355	2.05779	0.917928	1.80281	0.430705	0.526134	0.863538	0.348323	0.956925	0.160182
0.518188	2.05972	0.918634	1.80474	0.429805	0.524987	0.865506	0.34793	0.955796	0.159637
0.51902	2.06067	0.9187	1.80569	0.429702	0.523913	0.868794	0.347112	0.955137	0.160007
0.519853	2.06037	0.91858	1.80539	0.427705	0.524044	0.8706	0.346296	0.957528	0.160304
0.520685	2.0593	0.91917	1.80432	0.428672	0.52419	0.869249	0.345986	0.958902	0.160264
0.521518	2.0594	0.919099	1.80442	0.42732	0.52325	0.870777	0.345943	0.958944	0.159511
0.52235	2.06217	0.918161	1.8072	0.426599	0.522651	0.870591	0.345221	0.959505	0.158319
0.523183	2.06557	0.91767	1.81059	0.426936	0.520641	0.870201	0.34481	0.961204	0.158208
0.524015	2.06749	0.917899	1.81251	0.426166	0.518289	0.869212	0.34452	0.960095	0.159263
0.524848	2.06774	0.918449	1.81276	0.424966	0.515441	0.867268	0.344067	0.959631	0.160098
0.52568	2.06881	0.919688	1.81384	0.423705	0.513865	0.86516	0.343233	0.959501	0.160403
0.526513	2.06986	0.920415	1.81488	0.42233	0.513088	0.865804	0.344469	0.957751	0.160641
0.527345	2.06996	0.921506	1.81498	0.423026	0.511028	0.862778	0.344884	0.957931	0.160207
0.528178	2.07059	0.922221	1.81561	0.421069	0.50853	0.86084	0.344192	0.956756	0.159134
0.52901	2.07086	0.92226	1.81588	0.41912	0.50728	0.861024	0.344548	0.955731	0.159877
0.529843	2.07225	0.920291	1.81727	0.418336	0.508293	0.861258	0.345208	0.954779	0.162082
0.530675	2.07446	0.920455	1.81948	0.416988	0.508694	0.860247	0.344319	0.955211	0.163166
0.531508	2.07616	0.919707	1.82118	0.417424	0.506662	0.859187	0.343868	0.955426	0.16328
0.53234	2.07818	0.919711	1.8232	0.41788	0.504677	0.857541	0.344284	0.953452	0.163239
0.533173	2.07789	0.920802	1.82291	0.417848	0.503909	0.857265	0.345532	0.952887	0.164509
0.534005	2.0776	0.920688	1.82262	0.41846	0.50258	0.856263	0.345532	0.95326	0.166331
0.534838	2.07669	0.918813	1.82171	0.41855	0.502116	0.854318	0.345485	0.95273	0.167507
0.53567	2.07593	0.917566	1.82095	0.418	0.50113	0.852754	0.345773	0.954097	0.168406
0.536503	2.07515	0.917581	1.82017	0.417478	0.499635	0.851146	0.345478	0.952525	0.169033
0.537335	2.07549	0.916995	1.82051	0.417802	0.499896	0.849566	0.345165	0.952395	0.169986
0.538168	2.07516	0.916042	1.82018	0.418388	0.498928	0.850467	0.345529	0.951585	0.16989
0.539	2.07385	0.915601	1.81887	0.419719	0.498631	0.846245	0.34515	0.952408	0.170083
0.539833	2.07361	0.914956	1.81863	0.41911	0.497301	0.844172	0.345682	0.951191	0.171244
0.540665	2.07437	0.915065	1.8194	0.419265	0.495625	0.843653	0.346235	0.948308	0.171319
0.541498	2.07569	0.913415	1.82071	0.417518	0.49346	0.843297	0.346312	0.946928	0.170434
0.54233	2.07497	0.912326	1.81999	0.416673	0.492311	0.841201	0.346004	0.94552	0.169907
0.543163	2.07288	0.914178	1.8179	0.41559	0.491012	0.840968	0.344938	0.944055	0.170166
0.543995	2.07036	0.914804	1.81538	0.414998	0.4917	0.842871	0.344909	0.941664	0.171259
0.544828	2.06877	0.915271	1.81379	0.414037	0.492664	0.842647	0.345427	0.942543	0.171716
0.54566	2.06757	0.915376	1.81259	0.415178	0.49279	0.844409	0.345077	0.939813	0.170879
0.546493	2.06708	0.914619	1.8121	0.416419	0.491921	0.843816	0.345534	0.940031	0.170006
0.547325	2.06713	0.914449	1.81215	0.416503	0.490752	0.842367	0.345242	0.939422	0.168944
0.548158	2.06783	0.913655	1.81285	0.416179	0.491255	0.842565	0.344264	0.940069	0.168572
0.54899	2.06828	0.912215	1.8133	0.417348	0.491589	0.842152	0.34353	0.94096	0.168883
0.549823	2.06805	0.910949	1.81307	0.418918	0.490433	0.842672	0.342207	0.941166	0.167894
0.550655	2.0663	0.911245	1.81132	0.418943	0.488256	0.84117	0.340566	0.939606	0.166191
0.551488	2.06343	0.912128	1.80845	0.420501	0.486649	0.842241	0.340872	0.939004	0.165109
0.55232	2.06261	0.913083	1.80763	0.419803	0.486148	0.842378	0.341606	0.937147	0.164944
0.553153	2.06217	0.912896	1.80719	0.418689	0.486124	0.842625	0.340389	0.937959	0.165607
0.553985	2.06216	0.912664	1.80717	0.417627	0.486333	0.840148	0.33921	0.93781	0.165692
0.554818	2.06214	0.913697	1.80716	0.417966	0.48767	0.839206	0.338234	0.937914	0.164791
0.55565	2.06277	0.915139	1.80779	0.418542	0.487653	0.839506	0.336677	0.938104	0.164881
0.556483	2.06316	0.914529	1.80818	0.419118	0.487355	0.841588	0.336816	0.937262	0.16512
0.557315	2.06235	0.913448	1.80737	0.419769	0.487265	0.839531	0.336545	0.940192	0.164634
0.558148	2.06193	0.913936	1.80695	0.420058	0.485691	0.837857	0.336775	0.941201	0.163303
0.55898	2.06271	0.915067	1.80773	0.419387	0.48482	0.836478	0.336026	0.941966	0.162194
0.559813	2.06324	0.914478	1.80825	0.418121	0.484149	0.838209	0.334002	0.941622	0.161202
0.560645	2.06288	0.915416	1.8079	0.418084	0.483886	0.837948	0.33305	0.942703	0.159454
0.561478	2.06259	0.915456	1.80761	0.41805	0.48305	0.83689	0.332018	0.944256	0.157839
0.56231	2.06148	0.916898	1.8065	0.419166	0.482585	0.836401	0.329909	0.943585	0.15723
0.563143	2.06146	0.91772	1.80648	0.420148	0.482151	0.836921	0.32923	0.945997	0.156995
0.563975	2.06187	0.916566	1.80689	0.420955	0.480932	0.837515	0.330044	0.943568	0.156748
0.564808	2.06072	0.916122	1.80574	0.4216	0.478691	0.833305	0.330054	0.94457	0.155906
0.56564	2.05936	0.916259	1.80438	0.422996	0.476177	0.833996	0.328975	0.944328	0.155573
0.566473	2.05955	0.916423	1.80457	0.421819	0.475087	0.834478	0.326799	0.946374	0.155727
0.567305	2.05925	0.916619	1.80427	0.421537	0.475723	0.834133	0.324663	0.944524	0.155931
0.568138	2.05781	0.916413	1.80282	0.420612	0.476993	0.834715	0.323157	0.945393	0.157244
0.56897	2.05557	0.91636	1.80059	0.419748	0.475828	0.834138	0.322273	0.945851	0.15757
0.569803	2.05373	0.916616	1.79875	0.419042	0.474628	0.835124	0.321125	0.947056	0.158305
0.570635	2.05219	0.917825	1.79721	0.419242	0.474486	0.834615	0.32043	0.948529	0.15936
0.571468	2.05185	0.918666	1.79687	0.418975	0.475152	0.834897	0.319571	0.949604	0.159918
0.5723	2.05412	0.917085	1.79914	0.419093	0.47627	0.833669	0.318847	0.949707	0.161225
0.573133	2.05534	0.915151	1.80036	0.418603	0.476165	0.834177	0.318418	0.951518	0.161656
0.573965	2.05416	0.914781	1.79918	0.418559	0.475384	0.834305	0.318055	0.951799	0.16041
0.574798	2.05247	0.915155	1.79749	0.417674	0.474366	0.834833	0.317162	0.954753	0.159648
0.57563	2.05266	0.915582	1.79768	0.416446	0.473096	0.836018	0.317077	0.955054	0.15927
0.576463	2.05339	0.915437	1.79841	0.41524	0.472498	0.835391	0.317624	0.953405	0.15831
0.577295	2.05375	0.916074	1.79877	0.413949	0.470998	0.831501	0.316669	0.954175	0.157968
0.578128	2.05343	0.917571	1.79845	0.41199	0.468294	0.832443	0.316897	0.953756	0.157587
0.57896	2.05298	0.917472	1.798	0.409475	0.466805	0.834046	0.315862	0.952295	0.157159
0.579793	2.05081	0.916251	1.79583	0.408483	0.465378	0.830542	0.314544	0.950266	0.158447
0.580625	2.04941	0.915775	1.79443	0.407134	0.464463	0.830727	0.314775	0.950398	0.159816
0.581458	2.0489	0.915443	1.79392	0.406339	0.464748	0.830203	0.313143	0.950734	0.160698
0.58229	2.04981	0.915302	1.79483	0.40575	0.465026	0.829843	0.313116	0.950772	0.161882
0.583123	2.05046	0.91455	1.79548	0.404376	0.46462	0.829367	0.314605	0.952272	0.162607
0.583955	2.05094	0.913627	1.79596	0.404266	0.46356	0.829301	0.314039	0.950058	0.163337
0.584788	2.05152	0.913947	1.79654	0.403407	0.463297	0.827834	0.31147	0.951654	0.163547
0.58562	2.05173	0.914998	1.79675	0.402896	0.463838	0.829744	0.309964	0.95001	0.163476
0.586453	2.05305	0.914777	1.79807	0.40252	0.464856	0.827242	0.309995	0.950829	0.162628
0.587285	2.05393	0.914899	1.79895	0.402528	0.465774	0.827518	0.310738	0.949413	0.161967
0.588118	2.05414	0.914863	1.79916	0.401649	0.465492	0.829716	0.310895	0.951226	0.161913
0.58895	2.0539	0.914489	1.79892	0.401811	0.464048	0.828108	0.311449	0.951412	0.160913
0.589783	2.05373	0.914651	1.79875	0.401227	0.464185	0.829533	0.311268	0.950564	0.160495
0.590615	2.05327	0.914539	1.79829	0.400787	0.464226	0.827333	0.31167	0.947517	0.159625
0.591448	2.0542	0.913776	1.79922	0.399514	0.463986	0.825605	0.311008	0.946414	0.159143
0.59228	2.05645	0.912803	1.80147	0.399091	0.463371	0.82596	0.311241	0.945929	0.159368
0.593113	2.05527	0.913095	1.80029	0.398374	0.461829	0.824928	0.311958	0.946189	0.158895
0.593945	2.05356	0.915021	1.79858	0.398324	0.460511	0.822503	0.310243	0.944766	0.158738
0.594778	2.05401	0.915948	1.79903	0.396993	0.459795	0.82221	0.31043	0.94444	0.159571
0.59561	2.055	0.915061	1.80002	0.397817	0.459306	0.822654	0.311529	0.941787	0.160089
0.596443	2.05452	0.913524	1.79954	0.398185	0.458346	0.819593	0.311865	0.939789	0.159907
0.597275	2.05433	0.912511	1.79935	0.397691	0.457311	0.820547	0.311662	0.941117	0.159783
0.598108	2.05523	0.912465	1.80025	0.396886	0.456946	0.822141	0.31217	0.940417	0.159206
0.59894	2.05639	0.910539	1.80141	0.395921	0.456942	0.821412	0.312164	0.937673	0.15902
0.599773	2.05614	0.910331	1.80116	0.396562	0.456993	0.818896	0.31221	0.937477	0.158774
0.600605	2.05653	0.91096	1.80154	0.396278	0.456407	0.82167	0.312989	0.938218	0.157646
0.601438	2.05806	0.911731	1.80308	0.395799	0.454876	0.821608	0.31298	0.936824	0.15653
0.60227	2.0594	0.911866	1.80442	0.395244	0.453149	0.821375	0.313048	0.934693	0.156356
0.603103	2.05758	0.911199	1.8026	0.396213	0.452014	0.821554	0.312603	0.932894	0.15681
0.603935	2.05631	0.910794	1.80133	0.397147	0.451096	0.821781	0.312818	0.930117	0.15696
0.604768	2.05618	0.909845	1.8012	0.395053	0.450548	0.821031	0.312315	0.931486	0.156192
0.6056	2.05402	0.907664	1.79904	0.393068	0.450248	0.822195	0.313532	0.932851	0.155685
0.606433	2.05217	0.904771	1.79719	0.392326	0.449736	0.82126	0.312167	0.935431	0.156729
0.607265	2.05021	0.904119	1.79523	0.39112	0.448469	0.821713	0.311687	0.93567	0.15869
0.608098	2.04772	0.904185	1.79274	0.391042	0.446386	0.820217	0.312349	0.934702	0.160192
0.60893	2.04667	0.903993	1.79169	0.39121	0.443833	0.818648	0.311956	0.933377	0.160504
0.609763	2.04653	0.902791	1.79155	0.391368	0.442142	0.819818	0.311631	0.931925	0.16138
0.610595	2.04682	0.901881	1.79184	0.391931	0.440066	0.819317	0.312068	0.93356	0.161832
0.611428	2.04759	0.901582	1.79261	0.39116	0.438573	0.821287	0.311673	0.93451	0.161135
0.61226	2.04711	0.901002	1.79213	0.39084	0.437606	0.821599	0.312112	0.933069	0.160224
0.613093	2.04475	0.901571	1.78977	0.390958	0.436646	0.820609	0.312179	0.932534	0.159836
0.613925	2.04414	0.903142	1.78916	0.389995	0.435393	0.822654	0.311334	0.930874	0.159052
0.614758	2.04347	0.902969	1.78849	0.388946	0.434938	0.823527	0.311525	0.930547	0.159312
0.61559	2.04231	0.903741	1.78733	0.388965	0.434989	0.823745	0.310675	0.929599	0.159488
0.616423	2.04253	0.903281	1.78755	0.387805	0.434815	0.824979	0.310141	0.927786	0.158514
0.617255	2.04122	0.902358	1.78624	0.387077	0.434499	0.825846	0.309236	0.927616	0.15876
0.618088	2.03844	0.901324	1.78346	0.386756	0.434172	0.824342	0.307642	0.925599	0.15908
0.61892	2.03769	0.900794	1.78271	0.386701	0.434235	0.823788	0.306892	0.926015	0.159371
0.619753	2.03598	0.901237	1.781	0.386922	0.434174	0.824204	0.30546	0.928353	0.15968
0.620585	2.03544	0.900947	1.78046	0.386781	0.434131	0.825463	0.304061	0.9292	0.160022
0.621418	2.03509	0.901445	1.78011	0.386123	0.434695	0.824649	0.302894	0.930203	0.16037
0.62225	2.03412	0.901857	1.77914	0.385177	0.434488	0.82247	0.303694	0.930988	0.160614
0.623083	2.03339	0.901815	1.77841	0.385024	0.433355	0.823162	0.304868	0.932859	0.160741
0.623915	2.03517	0.902806	1.78019	0.384488	0.432978	0.82166	0.305092	0.93384	0.160393
0.624748	2.03614	0.904004	1.78116	0.383815	0.433336	0.820213	0.304943	0.935605	0.160711
0.62558	2.03601	0.904882	1.78103	0.384696	0.433246	0.819619	0.304403	0.935193	0.161172
0.626413	2.03728	0.905914	1.7823	0.3852	0.43273	0.81886	0.304164	0.934249	0.160847
0.627245	2.03879	0.907651	1.78381	0.384462	0.431811	0.817362	0.305658	0.931731	0.159671
0.628078	2.03959	0.907731	1.78461	0.384277	0.430722	0.816759	0.306163	0.928834	0.158264
0.62891	2.03936	0.906926	1.78438	0.384072	0.430705	0.81494	0.306339	0.929265	0.158124
0.629743	2.0384	0.907483	1.78342	0.383464	0.431546	0.812474	0.30796	0.927186	0.157948
0.630575	2.03714	0.908727	1.78216	0.383699	0.43173	0.81287	0.307534	0.925971	0.157072
0.631408	2.03678	0.909604	1.7818	0.383256	0.431497	0.812127	0.306109	0.923331	0.156513
0.63224	2.03768	0.910232	1.7827	0.383317	0.431599	0.810068	0.307138	0.922853	0.157257
0.633073	2.03867	0.910953	1.78369	0.382489	0.431122	0.810319	0.307331	0.921391	0.158462
0.633905	2.03998	0.909959	1.785	0.381376	0.430949	0.811016	0.305933	0.922691	0.158845
0.634738	2.04072	0.907952	1.78574	0.38177	0.431994	0.81134	0.305788	0.923188	0.159256
0.63557	2.04021	0.907701	1.78523	0.380984	0.432541	0.810855	0.306075	0.924069	0.158023
0.636403	2.04064	0.906106	1.78566	0.380691	0.431619	0.810317	0.306694	0.923919	0.156687
0.637235	2.0401	0.904588	1.78512	0.380719	0.430419	0.809277	0.306091	0.924554	0.156972
0.638068	2.04084	0.905355	1.78586	0.381349	0.429567	0.809382	0.30575	0.925845	0.156654
0.6389	2.04371	0.907132	1.78872	0.381986	0.427921	0.809617	0.305857	0.92652	0.15651
0.639733	2.04336	0.907981	1.78838	0.382079	0.426756	0.80963	0.306294	0.924683	0.156607
0.640565	2.04403	0.908281	1.78905	0.381143	0.426469	0.810471	0.306726	0.922778	0.156232
0.641398	2.04614	0.907369	1.79116	0.381162	0.425463	0.812159	0.307791	0.922314	0.157505
0.64223	2.04712	0.906005	1.79214	0.381812	0.423692	0.810789	0.30746	0.920502	0.158819
0.643063	2.04719	0.905036	1.79221	0.382743	0.422265	0.812339	0.305718	0.920108	0.158641
0.643895	2.04539	0.904473	1.79041	0.384252	0.422027	0.811589	0.304066	0.917904	0.157376
0.644728	2.04317	0.9033	1.78819	0.383723	0.422201	0.812598	0.304297	0.915623	0.15644
0.64556	2.04356	0.902106	1.78858	0.384099	0.421439	0.813568	0.304544	0.913997	0.155267
0.646393	2.04266	0.901988	1.78768	0.384254	0.42121	0.813456	0.305837	0.912685	0.15495
0.647225	2.04134	0.901998	1.78636	0.384513	0.42114	0.81311	0.30623	0.911599	0.155203
0.648058	2.04115	0.901546	1.78617	0.38404	0.421746	0.815274	0.305896	0.911693	0.155676
0.64889	2.04088	0.9019	1.7859	0.384074	0.423303	0.816365	0.304924	0.911405	0.156023
0.649723	2.04228	0.901338	1.7873	0.383609	0.423891	0.817101	0.303722	0.911106	0.154587
0.650555	2.04289	0.900777	1.78791	0.382985	0.423424	0.81838	0.302641	0.912847	0.154622
0.651388	2.04265	0.89998	1.78767	0.381118	0.422604	0.816046	0.302895	0.914762	0.15539
0.65222	2.042	0.899171	1.78702	0.381171	0.421916	0.816397	0.30397	0.914971	0.155902
0.653053	2.03911	0.898875	1.78413	0.380916	0.421315	0.816425	0.30436	0.914974	0.156159
0.653885	2.03804	0.899095	1.78306	0.381999	0.421262	0.81462	0.303633	0.916962	0.155725
0.654718	2.03728	0.899291	1.7823	0.381929	0.420017	0.815197	0.304399	0.915888	0.154366
0.65555	2.03606	0.898965	1.78108	0.380809	0.417773	0.813659	0.30512	0.916804	0.154052
0.656383	2.03927	0.8984	1.78429	0.381475	0.415671	0.815318	0.304609	0.915013	0.154924
0.657215	2.03955	0.900119	1.78457	0.382175	0.415674	0.81513	0.304318	0.916429	0.155405
0.658047	2.03925	0.902848	1.78427	0.382228	0.416332	0.814663	0.305031	0.916815	0.154886
0.65888	2.03779	0.903026	1.78281	0.38074	0.416981	0.815314	0.305607	0.915299	0.154782
0.659712	2.0361	0.902726	1.78112	0.379657	0.418658	0.815126	0.30626	0.91679	0.154747
0.660545	2.03548	0.902963	1.7805	0.380355	0.419324	0.814549	0.305874	0.917407	0.153682
0.661377	2.03569	0.902934	1.78071	0.381673	0.418695	0.814348	0.306144	0.918766	0.153582
0.66221	2.03496	0.903194	1.77998	0.38158	0.418325	0.813093	0.306377	0.916379	0.152815
0.663042	2.03539	0.903236	1.78041	0.380454	0.418652	0.814043	0.307244	0.917519	0.151122
0.663875	2.03475	0.903077	1.77977	0.379852	0.419544	0.813042	0.30891	0.915827	0.150165
0.664707	2.03434	0.903241	1.77936	0.378263	0.419169	0.811453	0.309204	0.916861	0.150488
0.66554	2.0347	0.903531	1.77972	0.378032	0.417438	0.810876	0.308207	0.920242	0.150701
0.666372	2.03412	0.903772	1.77914	0.376632	0.41637	0.810978	0.306256	0.920514	0.151351
0.667205	2.03364	0.903867	1.77866	0.3761	0.415285	0.811675	0.30554	0.919166	0.15199
0.668037	2.03383	0.903674	1.77885	0.376222	0.413719	0.811361	0.304688	0.919558	0.151939
0.66887	2.03241	0.904344	1.77743	0.376073	0.411855	0.809793	0.304897	0.919682	0.151164
0.669702	2.03118	0.904132	1.7762	0.376264	0.409853	0.80827	0.304365	0.922268	0.151466
0.670535	2.03109	0.904361	1.77611	0.376352	0.408196	0.807405	0.303769	0.922955	0.152348
0.671367	2.03078	0.904081	1.7758	0.376922	0.406886	0.806368	0.303719	0.921135	0.151992
0.6722	2.03149	0.905044	1.77651	0.378513	0.406373	0.806962	0.303854	0.919464	0.152404
0.673032	2.03147	0.905889	1.77649	0.378839	0.406338	0.806599	0.302647	0.919853	0.151898
0.673865	2.03318	0.906059	1.7782	0.378972	0.405819	0.807466	0.302367	0.918431	0.151579
0.674697	2.03441	0.906089	1.77943	0.378326	0.40463	0.808281	0.304225	0.917607	0.152708
0.67553	2.03445	0.906556	1.77947	0.377832	0.403893	0.807549	0.304886	0.919383	0.154599
0.676362	2.0338	0.907321	1.77882	0.376933	0.403842	0.806802	0.304322	0.919346	0.155185
0.677195	2.03108	0.907321	1.7761	0.375739	0.403905	0.805095	0.305592	0.920138	0.155531
0.678027	2.02914	0.904834	1.77415	0.37543	0.402893	0.803461	0.305287	0.918214	0.156437
0.67886	2.02762	0.902721	1.77264	0.375514	0.401498	0.80247	0.304124	0.917526	0.157501
0.679692	2.02759	0.90295	1.77261	0.375423	0.4	0.80048	0.304297	0.920025	0.15769
0.680525	2.02819	0.903743	1.77321	0.374524	0.398353	0.80115	0.303347	0.919031	0.157969
0.681357	2.02771	0.904014	1.77273	0.373492	0.397124	0.801338	0.30287	0.919506	0.158257
0.68219	2.02671	0.904891	1.77174	0.372617	0.396241	0.801086	0.302856	0.919563	0.158078
0.683022	2.02351	0.906251	1.76853	0.372499	0.396183	0.801151	0.301534	0.920706	0.158039
0.683855	2.01995	0.907106	1.76497	0.37334	0.395709	0.799247	0.300927	0.919674	0.158596
0.684687	2.01824	0.907706	1.76326	0.373321	0.395435	0.799117	0.300755	0.922059	0.159107
0.68552	2.0188	0.90809	1.76382	0.373704	0.395305	0.800601	0.302822	0.92171	0.159656
0.686352	2.01908	0.908923	1.7641	0.374028	0.394548	0.801225	0.302235	0.919202	0.160093
0.687185	2.01919	0.909021	1.76421	0.374784	0.39422	0.803267	0.302714	0.921796	0.160163
0.688017	2.01993	0.908765	1.76495	0.375365	0.394953	0.803603	0.304295	0.924241	0.15999
0.68885	2.02013	0.909166	1.76515	0.375528	0.3956	0.805067	0.305127	0.924451	0.160721
0.689682	2.01977	0.907602	1.76479	0.375821	0.39552	0.807212	0.304256	0.924233	0.161408
0.690515	2.01986	0.90599	1.76488	0.37577	0.395017	0.80691	0.305671	0.923454	0.160656
0.691347	2.01946	0.905221	1.76448	0.375566	0.394765	0.807349	0.306407	0.923107	0.160452
0.69218	2.0174	0.904481	1.76242	0.374997	0.394572	0.807425	0.307286	0.924327	0.160036
0.693012	2.01593	0.903859	1.76094	0.374503	0.393518	0.804982	0.307202	0.924016	0.158348
0.693845	2.014	0.903318	1.75902	0.373803	0.393152	0.803578	0.308862	0.92223	0.157934
0.694677	2.01168	0.902415	1.7567	0.373807	0.392531	0.802962	0.307716	0.924185	0.157668
0.69551	2.00875	0.901019	1.75377	0.374286	0.39145	0.805344	0.307077	0.922926	0.157235
0.696342	2.00822	0.90056	1.75324	0.375014	0.39104	0.807052	0.305369	0.921693	0.155556
0.697175	2.00747	0.900808	1.75249	0.376413	0.389857	0.806461	0.304905	0.922348	0.154281
0.698007	2.00707	0.90191	1.75209	0.376737	0.388813	0.805096	0.302409	0.921828	0.153524
0.69884	2.00733	0.903989	1.75235	0.37655	0.388222	0.804974	0.302484	0.922747	0.153187
0.699672	2.00697	0.904752	1.75199	0.375573	0.387375	0.804772	0.302932	0.923442	0.152575
0.700505	2.00645	0.903876	1.75147	0.375669	0.387881	0.806002	0.302673	0.92175	0.15155
0.701337	2.00499	0.902051	1.75001	0.376243	0.387617	0.806487	0.304404	0.920992	0.150948
0.70217	2.00687	0.900468	1.75189	0.37614	0.386841	0.805324	0.305398	0.918978	0.150499
0.703002	2.00808	0.898797	1.7531	0.376353	0.386747	0.804372	0.305048	0.917486	0.150569
0.703835	2.0093	0.89825	1.75432	0.376199	0.38539	0.803585	0.305469	0.917303	0.149903
0.704667	2.01147	0.898248	1.75649	0.37605	0.384356	0.803754	0.305806	0.917625	0.15004
0.7055	2.01361	0.898015	1.75863	0.375888	0.383728	0.803894	0.305082	0.916513	0.149279
0.706332	2.01325	0.897798	1.75827	0.375446	0.383779	0.805954	0.304011	0.916132	0.148493
0.707165	2.01117	0.897449	1.75619	0.375121	0.385	0.806444	0.304405	0.914684	0.148145
0.707997	2.00876	0.896541	1.75378	0.375274	0.385221	0.803159	0.304124	0.912149	0.147016
0.70883	2.00943	0.895206	1.75445	0.375093	0.384209	0.800876	0.303595	0.911825	0.146421
0.709662	2.0109	0.894773	1.75592	0.373437	0.383959	0.799842	0.302873	0.913184	0.144869
0.710495	2.01303	0.895936	1.75805	0.373794	0.384345	0.797892	0.303344	0.912323	0.143547
0.711327	2.01338	0.896709	1.7584	0.374261	0.384324	0.797227	0.302558	0.910153	0.143673
0.71216	2.01252	0.896962	1.75754	0.374551	0.383881	0.796646	0.302352	0.908765	0.143182
0.712992	2.01336	0.897214	1.75838	0.375449	0.383482	0.79721	0.300698	0.907616	0.143543
0.713825	2.01539	0.897783	1.76041	0.375337	0.383857	0.801562	0.300371	0.90796	0.144126
0.714657	2.01677	0.897781	1.76179	0.374963	0.38343	0.80212	0.29867	0.90844	0.143544
0.71549	2.01757	0.898769	1.76259	0.374662	0.382966	0.802014	0.299262	0.907489	0.143384
0.716322	2.01865	0.900109	1.76367	0.374568	0.382763	0.799569	0.298695	0.908118	0.142303
0.717155	2.01876	0.900579	1.76378	0.374986	0.381466	0.796487	0.299614	0.906367	0.142384
0.717987	2.02093	0.90042	1.76595	0.374089	0.381567	0.796272	0.301185	0.905718	0.14294
0.71882	2.02193	0.900123	1.76695	0.373431	0.382786	0.79807	0.302575	0.907656	0.143072
0.719652	2.02116	0.899848	1.76618	0.372375	0.382828	0.798292	0.30187	0.908152	0.142185
0.720485	2.02129	0.900443	1.76632	0.371833	0.381922	0.798438	0.302593	0.907518	0.142346
0.721317	2.02124	0.901134	1.76626	0.371305	0.379843	0.799062	0.302374	0.907244	0.143129
0.72215	2.02136	0.902106	1.76638	0.371398	0.377666	0.798911	0.301818	0.908601	0.143083
0.722982	2.01856	0.903465	1.76358	0.371349	0.376988	0.800767	0.300821	0.90833	0.143042
0.723815	2.01802	0.904662	1.76304	0.371494	0.376876	0.800165	0.300044	0.907415	0.142804
0.724647	2.01776	0.904735	1.76277	0.371656	0.377833	0.798954	0.299852	0.907179	0.143335
0.72548	2.01717	0.905057	1.76219	0.369754	0.379017	0.800599	0.299681	0.907331	0.143943
0.726312	2.01501	0.904771	1.76003	0.370799	0.379759	0.799938	0.299404	0.905799	0.145216
0.727145	2.01406	0.904723	1.75908	0.371034	0.379591	0.795856	0.299881	0.904471	0.146121
0.727977	2.01385	0.904565	1.75887	0.369949	0.379042	0.794387	0.300415	0.905569	0.14639
0.72881	2.01378	0.905286	1.7588	0.368848	0.379147	0.795456	0.301381	0.906096	0.146762
0.729642	2.01082	0.906295	1.75584	0.368171	0.378911	0.796565	0.299861	0.905047	0.146042
0.730475	2.00792	0.90565	1.75294	0.369298	0.377632	0.797095	0.300208	0.904287	0.146389
0.731307	2.00562	0.905151	1.75064	0.369432	0.376205	0.796256	0.300378	0.905549	0.146912
0.73214	2.00601	0.906062	1.75103	0.368127	0.375617	0.79845	0.301366	0.905341	0.146061
0.732972	2.00533	0.906661	1.75035	0.366571	0.374647	0.798828	0.3027	0.906671	0.146334
0.733805	2.00326	0.907136	1.74828	0.364381	0.374081	0.800279	0.303159	0.908949	0.146493
0.734637	2.00013	0.907354	1.74515	0.363538	0.374314	0.797967	0.302968	0.91002	0.146687
0.73547	1.99867	0.907972	1.74369	0.363813	0.374485	0.798125	0.30252	0.911667	0.14744
0.736302	1.99825	0.907674	1.74327	0.364907	0.374692	0.796421	0.302405	0.911024	0.148256
0.737135	1.99712	0.907146	1.74214	0.36436	0.374683	0.796851	0.302724	0.910051	0.148221
0.737967	1.99655	0.907998	1.74157	0.363025	0.375987	0.797586	0.303366	0.911225	0.148033
0.7388	1.99407	0.908885	1.73909	0.363261	0.376506	0.799311	0.301954	0.911105	0.14786
0.739632	1.99006	0.908708	1.73508	0.36453	0.375775	0.798317	0.302493	0.908374	0.147933
0.740465	1.98894	0.907964	1.73396	0.36571	0.374968	0.798153	0.303985	0.906478	0.148822
0.741297	1.99012	0.907123	1.73514	0.365819	0.37462	0.797366	0.301814	0.906817	0.148624
0.74213	1.98923	0.90709	1.73425	0.365928	0.375163	0.797221	0.301275	0.906167	0.149384
0.742962	1.9888	0.906785	1.73382	0.366792	0.376694	0.796458	0.301573	0.90391	0.150192
0.743795	1.9887	0.905296	1.73372	0.36715	0.377729	0.794343	0.301963	0.90363	0.150298
0.744627	1.98838	0.904737	1.7334	0.366264	0.37721	0.793846	0.302805	0.903144	0.150449
0.74546	1.98827	0.904611	1.73329	0.36538	0.376402	0.794176	0.30464	0.903763	0.151199
0.746292	1.98532	0.904239	1.73034	0.366931	0.375716	0.794301	0.304556	0.904492	0.150473
0.747125	1.98476	0.904266	1.72978	0.366658	0.375191	0.796156	0.303713	0.905406	0.149523
0.747957	1.98517	0.903993	1.73019	0.365567	0.374847	0.798322	0.302488	0.905657	0.149736
0.74879	1.98449	0.904374	1.72951	0.365291	0.373898	0.797852	0.302603	0.905323	0.149037
0.749622	1.9831	0.905435	1.72812	0.364852	0.373683	0.797311	0.302638	0.904448	0.149581
0.750455	1.98345	0.906455	1.72847	0.36498	0.374329	0.796796	0.302761	0.902472	0.14978
0.751287	1.9826	0.907291	1.72762	0.365375	0.375034	0.795387	0.302698	0.901296	0.150036
0.75212	1.98203	0.907546	1.72705	0.364948	0.374927	0.795135	0.302812	0.900993	0.150052
0.752952	1.98128	0.907685	1.7263	0.364425	0.373504	0.794616	0.301731	0.900916	0.150428
0.753785	1.98134	0.908786	1.72636	0.364888	0.373608	0.795318	0.301365	0.900251	0.15017
0.754617	1.9825	0.910136	1.72752	0.365724	0.374418	0.794431	0.300873	0.899626	0.14957
0.75545	1.98329	0.910348	1.72831	0.365651	0.374512	0.795416	0.301241	0.899587	0.148368
0.756282	1.9854	0.910247	1.73042	0.364612	0.37464	0.794229	0.302877	0.900052	0.147846
0.757115	1.98449	0.910461	1.72951	0.362706	0.375414	0.793943	0.301976	0.89988	0.146944
0.757947	1.9847	0.910552	1.72972	0.36114	0.376601	0.793612	0.302253	0.899987	0.146885
0.75878	1.98476	0.91026	1.72978	0.360677	0.376408	0.792411	0.301689	0.900115	0.147771
0.759612	1.98553	0.910169	1.73055	0.360349	0.37677	0.791338	0.302514	0.900589	0.147
0.760445	1.98765	0.910318	1.73267	0.359824	0.376592	0.792516	0.301689	0.90184	0.146088
0.761277	1.98801	0.910651	1.73303	0.359733	0.376522	0.791794	0.301052	0.904433	0.146169
0.76211	1.98572	0.911121	1.73074	0.360032	0.37675	0.791619	0.303416	0.905196	0.146653
0.762942	1.98571	0.911027	1.73073	0.360378	0.376554	0.790159	0.302341	0.907765	0.145427
0.763775	1.98525	0.91137	1.73027	0.359163	0.376419	0.791265	0.301764	0.90991	0.145046
0.764607	1.98462	0.912439	1.72964	0.357911	0.375867	0.792307	0.302721	0.910812	0.145335
0.76544	1.98175	0.912648	1.72677	0.35781	0.376495	0.79427	0.30292	0.912947	0.145546
0.766272	1.97972	0.912553	1.72474	0.357906	0.377002	0.796771	0.301544	0.911622	0.144778
0.767105	1.9807	0.912368	1.72572	0.357351	0.376668	0.797919	0.30234	0.909304	0.144258
0.767937	1.98043	0.912759	1.72545	0.355544	0.376696	0.797724	0.303842	0.909518	0.145311
0.76877	1.97837	0.912969	1.72339	0.35584	0.376166	0.797453	0.304216	0.909507	0.144518
0.769602	1.97724	0.91229	1.72226	0.356614	0.375586	0.797658	0.30523	0.909388	0.145077
0.770435	1.97842	0.911475	1.72344	0.357106	0.374399	0.797662	0.304511	0.909371	0.145132
0.771267	1.97734	0.910722	1.72236	0.3576	0.373871	0.798956	0.306133	0.911321	0.145106
0.7721	1.97718	0.911206	1.7222	0.357936	0.373394	0.798268	0.305084	0.911226	0.145699
0.772932	1.97707	0.912114	1.72209	0.35819	0.373691	0.798688	0.304185	0.910595	0.146788
0.773765	1.97656	0.913051	1.72158	0.358293	0.375144	0.796701	0.305474	0.911986	0.146106
0.774597	1.97564	0.912709	1.72066	0.358644	0.375374	0.793351	0.304343	0.911514	0.14591
0.77543	1.97413	0.911363	1.71915	0.360629	0.373908	0.790419	0.3048	0.909812	0.146347
0.776262	1.97321	0.911178	1.71823	0.362264	0.372955	0.78901	0.304969	0.909087	0.14768
0.777095	1.97091	0.911468	1.71593	0.363036	0.37292	0.788902	0.30377	0.906345	0.148575
0.777927	1.97009	0.912631	1.71511	0.364404	0.37225	0.790947	0.304732	0.906119	0.148585
0.77876	1.9684	0.91397	1.71342	0.366353	0.371434	0.790607	0.304937	0.904711	0.147872
0.779592	1.96554	0.913657	1.71056	0.366622	0.37018	0.790437	0.304794	0.903196	0.146607
0.780425	1.96462	0.912984	1.70964	0.366517	0.368307	0.791252	0.304483	0.901608	0.147094
0.781257	1.96232	0.912416	1.70734	0.366838	0.367805	0.791911	0.304566	0.900947	0.149103
0.78209	1.96082	0.911599	1.70584	0.366306	0.367401	0.792581	0.305126	0.899123	0.149228
0.782922	1.96081	0.911863	1.70583	0.367519	0.367117	0.793919	0.3034	0.897149	0.149609
0.783755	1.9592	0.912765	1.70422	0.367524	0.367902	0.795336	0.305959	0.896034	0.151007
0.784587	1.95677	0.912986	1.70179	0.367332	0.368461	0.793948	0.30616	0.895141	0.150923
0.78542	1.95701	0.912933	1.70203	0.367032	0.368151	0.793225	0.305516	0.89476	0.151626
0.786252	1.9576	0.912667	1.70262	0.367233	0.367748	0.792557	0.304217	0.892843	0.152397
0.787085	1.9567	0.91265	1.70172	0.367278	0.366576	0.790119	0.304269	0.892371	0.152651
0.787917	1.95553	0.912502	1.70055	0.36696	0.365768	0.786736	0.303786	0.894395	0.152869
0.78875	1.95538	0.912254	1.7004	0.367912	0.364014	0.785179	0.304365	0.894479	0.152159
0.789582	1.95534	0.913001	1.70036	0.368083	0.362789	0.785667	0.303139	0.896078	0.151584
0.790415	1.95459	0.913432	1.69961	0.368163	0.362899	0.785197	0.300718	0.895855	0.150781
0.791247	1.95377	0.912614	1.69879	0.368125	0.363242	0.784464	0.300253	0.894869	0.149452
0.79208	1.95414	0.912454	1.69916	0.367059	0.36198	0.783185	0.299997	0.894415	0.149527
0.792912	1.95302	0.913203	1.69804	0.364772	0.361614	0.783968	0.301494	0.894304	0.149157
0.793745	1.95128	0.913835	1.6963	0.363891	0.362121	0.78467	0.302146	0.894385	0.148102
0.794577	1.94895	0.913238	1.69397	0.364717	0.361853	0.786335	0.301039	0.894878	0.149368
0.79541	1.94803	0.91282	1.69305	0.36452	0.362485	0.78824	0.301095	0.896222	0.149627
0.796242	1.94781	0.913619	1.69283	0.362632	0.363487	0.79022	0.301611	0.898197	0.149169
0.797075	1.94785	0.914108	1.69287	0.361652	0.363054	0.792473	0.300556	0.897985	0.148602
0.797907	1.94752	0.912694	1.69254	0.36152	0.3626	0.794528	0.301678	0.898557	0.148033
0.79874	1.94772	0.910848	1.69274	0.360322	0.362352	0.792446	0.300256	0.900026	0.148787
0.799572	1.94594	0.910598	1.69096	0.359285	0.362304	0.792461	0.299029	0.903264	0.148991
0.800405	1.9456	0.911115	1.69062	0.360286	0.362398	0.792852	0.300038	0.904814	0.149106
0.801237	1.94428	0.911885	1.6893	0.361158	0.362254	0.79103	0.298597	0.905864	0.14978
0.80207	1.94418	0.912572	1.6892	0.360858	0.361951	0.787536	0.297086	0.908013	0.149039
0.802902	1.9432	0.912946	1.68822	0.360913	0.362293	0.787508	0.296483	0.908911	0.148955
0.803735	1.94155	0.91291	1.68657	0.359986	0.36264	0.785424	0.297754	0.910699	0.148386
0.804567	1.94315	0.913131	1.68817	0.359986	0.361424	0.783488	0.295923	0.909711	0.14911
0.8054	1.94555	0.913816	1.69057	0.360143	0.359929	0.783806	0.296043	0.909452	0.149246
0.806232	1.94303	0.914607	1.68805	0.359925	0.359098	0.783578	0.294931	0.909913	0.148369
0.807065	1.94044	0.914653	1.68546	0.358743	0.357623	0.783186	0.295736	0.911156	0.148246
0.807897	1.94119	0.913915	1.68621	0.357881	0.357967	0.783062	0.296996	0.911927	0.147417
0.80873	1.94243	0.91439	1.68745	0.357141	0.357561	0.784766	0.296106	0.910549	0.147839
0.809562	1.94096	0.915038	1.68598	0.356229	0.357452	0.784889	0.296644	0.908924	0.148208
0.810395	1.93918	0.913902	1.6842	0.3555	0.357901	0.783834	0.298964	0.908221	0.147919
0.811227	1.942	0.91365	1.68702	0.354367	0.35849	0.784361	0.298784	0.908982	0.148929
0.81206	1.9414	0.914579	1.68642	0.354408	0.358243	0.784523	0.298451	0.910298	0.151034
0.812892	1.9382	0.914928	1.68322	0.355359	0.358113	0.783814	0.297791	0.910659	0.151726
0.813725	1.93809	0.914447	1.68311	0.356908	0.358532	0.784291	0.298346	0.911068	0.151511
0.814557	1.93818	0.913583	1.6832	0.357188	0.357746	0.78498	0.298961	0.912217	0.152365
0.81539	1.93753	0.913093	1.68255	0.355691	0.357664	0.784956	0.298541	0.910495	0.152198
0.816222	1.93493	0.912923	1.67995	0.354825	0.356962	0.785247	0.299169	0.910654	0.152559
0.817055	1.93487	0.912984	1.67989	0.354179	0.356366	0.786518	0.298812	0.907573	0.152578
0.817887	1.93241	0.912839	1.67743	0.354211	0.356606	0.785856	0.29977	0.906375	0.153563
0.81872	1.92868	0.914176	1.6737	0.353944	0.355773	0.783985	0.298457	0.905453	0.153605
0.819552	1.92903	0.915673	1.67405	0.353532	0.355267	0.784171	0.300449	0.904147	0.153011
0.820385	1.93026	0.916108	1.67528	0.353374	0.354956	0.782823	0.300003	0.901808	0.152817
0.821217	1.93085	0.917197	1.67587	0.35226	0.35517	0.783295	0.29876	0.902965	0.153264
0.82205	1.92916	0.918014	1.67418	0.350848	0.355547	0.783598	0.301251	0.901522	0.152934
0.822882	1.92608	0.917844	1.6711	0.349073	0.355956	0.784028	0.30313	0.8995	0.152813
0.823715	1.9266	0.917136	1.67162	0.348003	0.356031	0.783961	0.302507	0.897672	0.153124
0.824547	1.92561	0.916639	1.67063	0.347842	0.355232	0.784537	0.301228	0.895735	0.153451
0.82538	1.92178	0.916579	1.6668	0.346812	0.356067	0.78356	0.301941	0.894882	0.152272
0.826212	1.91755	0.915786	1.66257	0.346027	0.356986	0.78257	0.299788	0.893802	0.151563
0.827045	1.91796	0.914684	1.66298	0.346046	0.356715	0.782589	0.299963	0.893188	0.151428
0.827877	1.91829	0.914901	1.66331	0.345882	0.3579	0.782293	0.299918	0.892808	0.151574
0.82871	1.91784	0.916238	1.66286	0.344609	0.358319	0.783482	0.298531	0.893323	0.153351
0.829542	1.91369	0.917133	1.65871	0.3437	0.358835	0.78192	0.298418	0.893069	0.153109
0.830375	1.91145	0.917266	1.65647	0.342006	0.359458	0.780584	0.297462	0.893804	0.152772
0.831207	1.91154	0.917384	1.65656	0.340661	0.358988	0.778577	0.295469	0.893847	0.152995
0.83204	1.90883	0.917211	1.65385	0.340448	0.358138	0.778617	0.296605	0.894009	0.152336
0.832872	1.90703	0.917733	1.65205	0.33962	0.357885	0.780185	0.297299	0.892642	0.150259
0.833705	1.90698	0.918136	1.652	0.338699	0.358053	0.779851	0.296837	0.892181	0.14882
0.834537	1.90607	0.91804	1.65109	0.33777	0.357189	0.778339	0.29591	0.891382	0.148661
0.83537	1.90598	0.918285	1.651	0.337964	0.356378	0.776534	0.295865	0.890385	0.147298
0.836202	1.90628	0.919126	1.6513	0.33936	0.354936	0.774627	0.29714	0.892222	0.145038
0.837035	1.90648	0.91998	1.6515	0.340179	0.354757	0.77327	0.297109	0.891402	0.143083
0.837867	1.90411	0.920623	1.64913	0.340909	0.354892	0.771797	0.296166	0.893115	0.142275
0.8387	1.90411	0.921031	1.64913	0.340886	0.354546	0.770447	0.295079	0.895247	0.140285
0.839532	1.90495	0.921138	1.64996	0.341249	0.354712	0.770449	0.296509	0.89559	0.140698
0.840365	1.90389	0.921323	1.64891	0.34155	0.354854	0.771961	0.294893	0.89506	0.140893
0.841197	1.90206	0.920842	1.64708	0.342204	0.353566	0.77401	0.295141	0.896287	0.141703
0.84203	1.9005	0.920228	1.64552	0.342681	0.352689	0.774305	0.295835	0.894556	0.140802
0.842862	1.89922	0.919713	1.64424	0.343335	0.352235	0.774982	0.294744	0.893535	0.140603
0.843695	1.90077	0.919761	1.64579	0.345668	0.352025	0.775537	0.294015	0.893105	0.140249
0.844527	1.89979	0.9215	1.64481	0.347306	0.35101	0.776075	0.294099	0.893727	0.139476
0.84536	1.9012	0.922176	1.64622	0.347909	0.350878	0.776551	0.294164	0.894915	0.139522
0.846192	1.90137	0.921109	1.64639	0.348956	0.350142	0.776948	0.293148	0.895024	0.139747
0.847025	1.90155	0.921344	1.64657	0.349944	0.348709	0.776448	0.294089	0.896577	0.139492
0.847857	1.89997	0.921897	1.64499	0.350349	0.349005	0.774774	0.294068	0.896186	0.140139
0.84869	1.89971	0.921783	1.64473	0.351588	0.34874	0.773506	0.293501	0.895183	0.139524
0.849522	1.89871	0.922446	1.64373	0.354366	0.347359	0.772815	0.292291	0.893847	0.137817
0.850355	1.89939	0.923379	1.64441	0.356963	0.346169	0.773688	0.293327	0.893325	0.137336
0.851187	1.90157	0.923543	1.64659	0.359151	0.345763	0.772984	0.294764	0.892795	0.137209
0.85202	1.90213	0.92438	1.64715	0.361102	0.344996	0.773256	0.295781	0.892094	0.137425
0.852852	1.90279	0.925641	1.64781	0.361869	0.344291	0.772323	0.295037	0.891863	0.137283
0.853685	1.90239	0.925201	1.64741	0.361106	0.344097	0.770623	0.29479	0.892596	0.138316
0.854517	1.90455	0.924463	1.64957	0.360957	0.34413	0.769513	0.294022	0.892464	0.139335
0.85535	1.90482	0.924743	1.64984	0.361167	0.343116	0.768738	0.293278	0.89153	0.139555
0.856182	1.90471	0.924964	1.64973	0.361489	0.342781	0.768144	0.291666	0.892219	0.13973
0.857015	1.90277	0.924838	1.64779	0.360742	0.344168	0.767887	0.290882	0.892386	0.141674
0.857847	1.90344	0.924497	1.64846	0.360229	0.344408	0.768446	0.289712	0.89162	0.143125
0.85868	1.90463	0.923444	1.64965	0.360154	0.34378	0.769021	0.290584	0.89035	0.14339
0.859512	1.90406	0.922521	1.64908	0.359986	0.34374	0.770644	0.290833	0.888983	0.145124
0.860345	1.90475	0.922595	1.64977	0.35967	0.34318	0.770642	0.289845	0.889203	0.143768
0.861177	1.90272	0.922126	1.64774	0.359336	0.341581	0.770251	0.289786	0.889715	0.143267
0.86201	1.90216	0.920959	1.64718	0.358047	0.341402	0.769628	0.289772	0.888852	0.1427
0.862842	1.90372	0.919988	1.64874	0.357478	0.341755	0.769297	0.288812	0.888907	0.144687
0.863675	1.90358	0.919578	1.6486	0.356755	0.34222	0.768996	0.289241	0.890373	0.145531
0.864507	1.9034	0.91954	1.64842	0.355121	0.341512	0.769184	0.289222	0.88982	0.146377
0.86534	1.90258	0.919406	1.6476	0.354667	0.341413	0.7695	0.288496	0.889685	0.145756
0.866172	1.90315	0.920001	1.64817	0.353265	0.340738	0.769053	0.288815	0.889184	0.145431
0.867005	1.90398	0.920831	1.649	0.352334	0.339656	0.769366	0.289808	0.888854	0.143855
0.867837	1.90434	0.920667	1.64936	0.351642	0.338581	0.770601	0.290509	0.887392	0.144451
0.86867	1.90295	0.920396	1.64797	0.350984	0.337941	0.770905	0.290858	0.887122	0.142593
0.869502	1.90269	0.920783	1.64771	0.350661	0.337151	0.770828	0.290478	0.885913	0.142648
0.870335	1.89987	0.920255	1.64489	0.349389	0.336788	0.770626	0.290074	0.885202	0.142421
0.871167	1.90211	0.918378	1.64713	0.34809	0.336833	0.770812	0.289305	0.885112	0.142824
0.872	1.89916	0.918351	1.64419	0.347217	0.336265	0.771959	0.287078	0.8856	0.143043
0.872832	1.89463	0.918521	1.63965	0.346626	0.336565	0.773418	0.287281	0.88701	0.142904
0.873664	1.89317	0.916982	1.63819	0.34707	0.335944	0.773908	0.288162	0.887214	0.143613
0.874497	1.89256	0.916917	1.63758	0.348254	0.334622	0.773523	0.289013	0.887449	0.143989
0.875329	1.88878	0.918143	1.6338	0.348935	0.333342	0.775433	0.291343	0.886048	0.144108
0.876162	1.88545	0.918576	1.63047	0.348996	0.333161	0.776431	0.29164	0.886196	0.143715
0.876994	1.88432	0.91859	1.62934	0.348422	0.333919	0.778211	0.292089	0.8842	0.143532
0.877827	1.88385	0.918393	1.62887	0.348296	0.333701	0.779856	0.290705	0.883354	0.141957
0.878659	1.88104	0.917785	1.62606	0.348167	0.3327	0.779542	0.291348	0.883591	0.141484
0.879492	1.87985	0.918542	1.62487	0.347858	0.331962	0.777833	0.289527	0.885556	0.142588
0.880324	1.87937	0.919471	1.62439	0.347276	0.33179	0.775046	0.289586	0.88614	0.142592
0.881157	1.87884	0.919893	1.62386	0.346147	0.331225	0.775617	0.290233	0.885365	0.143803
0.881989	1.878	0.920291	1.62302	0.345861	0.33112	0.775987	0.290334	0.883909	0.144217
0.882822	1.87633	0.920644	1.62135	0.346013	0.331567	0.774052	0.291071	0.882967	0.144837
0.883654	1.87413	0.920716	1.61915	0.346238	0.331368	0.772828	0.292913	0.882876	0.144642
0.884487	1.87518	0.920257	1.6202	0.346782	0.329962	0.772111	0.292617	0.880994	0.143529
0.885319	1.8724	0.920505	1.61742	0.347539	0.329868	0.772359	0.292634	0.882085	0.142374
0.886152	1.87293	0.92069	1.61795	0.347028	0.328804	0.770966	0.29266	0.881951	0.142325
0.886984	1.86864	0.920261	1.61366	0.347299	0.328245	0.769778	0.292793	0.882026	0.142074
0.887817	1.86715	0.919419	1.61217	0.346637	0.328182	0.768888	0.292144	0.882341	0.14334
0.888649	1.86691	0.919481	1.61193	0.346084	0.329219	0.766846	0.292143	0.882631	0.143422
0.889482	1.86518	0.920295	1.6102	0.346383	0.32938	0.767647	0.291513	0.88213	0.145436
0.890314	1.86305	0.920165	1.60807	0.345819	0.329077	0.769669	0.291661	0.882674	0.145445
0.891147	1.86342	0.920652	1.60844	0.346044	0.329357	0.768682	0.293598	0.882165	0.145798
0.891979	1.85986	0.921832	1.60488	0.346442	0.328924	0.766877	0.294314	0.881514	0.145897
0.892812	1.85746	0.922034	1.60248	0.347722	0.32956	0.76715	0.295056	0.881216	0.145322
0.893644	1.8588	0.9229	1.60382	0.348104	0.329005	0.767201	0.293954	0.879549	0.145586
0.894477	1.85649	0.924419	1.60151	0.347182	0.329156	0.766569	0.292887	0.87823	0.144219
0.895309	1.8569	0.925142	1.60192	0.346025	0.329896	0.766646	0.291927	0.876593	0.14207
0.896142	1.85596	0.925309	1.60098	0.344535	0.330965	0.766654	0.28975	0.877421	0.143135
0.896974	1.85675	0.925857	1.60177	0.34361	0.331836	0.766428	0.290655	0.87842	0.143013
0.897807	1.85445	0.926727	1.59947	0.342607	0.33124	0.765022	0.291036	0.879601	0.142856
0.898639	1.85333	0.926709	1.59835	0.342653	0.330165	0.763899	0.29218	0.87886	0.143923
0.899472	1.85384	0.927295	1.59886	0.342809	0.329016	0.764061	0.292478	0.876773	0.144874
0.900304	1.85325	0.92761	1.59827	0.342008	0.329213	0.764452	0.294124	0.87473	0.144555
0.901137	1.85099	0.926803	1.59601	0.342025	0.328703	0.764968	0.294293	0.874446	0.144517
0.901969	1.8491	0.926101	1.59412	0.343353	0.328228	0.763385	0.294299	0.875302	0.144802
0.902802	1.84725	0.925464	1.59227	0.344857	0.328832	0.762077	0.293314	0.87459	0.146056
0.903634	1.84652	0.926042	1.59154	0.345496	0.32849	0.763602	0.291953	0.87513	0.14618
0.904467	1.84436	0.926847	1.58938	0.344279	0.328785	0.764265	0.29022	0.875071	0.146319
0.905299	1.84143	0.927694	1.58645	0.343379	0.330089	0.763888	0.288958	0.87484	0.146912
0.906132	1.84256	0.927596	1.58758	0.34216	0.329929	0.762566	0.288397	0.873047	0.147166
0.906964	1.84004	0.927085	1.58506	0.341146	0.330144	0.761696	0.288864	0.873224	0.147176
0.907797	1.84014	0.927085	1.58516	0.341018	0.331698	0.762011	0.289344	0.872882	0.147413
0.908629	1.8381	0.927707	1.58312	0.341897	0.331841	0.762499	0.289136	0.871311	0.147534
0.909462	1.83522	0.927337	1.58024	0.342534	0.331821	0.762843	0.289666	0.871228	0.148201
0.910294	1.83592	0.926162	1.58094	0.342212	0.332037	0.762561	0.290883	0.871704	0.148627
0.911127	1.83487	0.92608	1.57989	0.341983	0.332509	0.761613	0.291918	0.871739	0.148445
0.911959	1.83479	0.92558	1.57981	0.342481	0.332119	0.76263	0.291235	0.872264	0.149269
0.912792	1.83507	0.924663	1.58009	0.342563	0.333305	0.763665	0.29044	0.872937	0.149469
0.913624	1.83781	0.924026	1.58283	0.34187	0.333839	0.762279	0.289807	0.872768	0.150303
0.914457	1.83757	0.923112	1.58259	0.341167	0.334383	0.760473	0.289532	0.871786	0.151164
0.915289	1.8372	0.923181	1.58222	0.340972	0.334159	0.760248	0.289839	0.870718	0.153317
0.916122	1.83417	0.923063	1.57919	0.342086	0.33346	0.761698	0.290461	0.87039	0.154686
0.916954	1.83407	0.922931	1.57909	0.34316	0.332782	0.761713	0.291543	0.869667	0.154388
0.917787	1.83252	0.922441	1.57754	0.343541	0.332702	0.761817	0.290408	0.869973	0.15526
0.918619	1.83202	0.921479	1.57704	0.343351	0.332515	0.762258	0.290673	0.870725	0.157172
0.919452	1.83177	0.922145	1.57679	0.342376	0.332259	0.761611	0.291468	0.871173	0.157104
0.920284	1.82861	0.922572	1.57363	0.342056	0.333235	0.761135	0.290742	0.872274	0.15545
0.921117	1.82579	0.922721	1.57081	0.342586	0.333324	0.761149	0.291311	0.871471	0.154531
0.921949	1.82506	0.923372	1.57008	0.342195	0.333657	0.762381	0.292397	0.869349	0.154591
0.922782	1.82474	0.923352	1.56976	0.340816	0.334073	0.763837	0.291919	0.869116	0.155354
0.923614	1.82478	0.923446	1.5698	0.338954	0.334489	0.764823	0.292672	0.869275	0.154571
0.924447	1.82551	0.923562	1.57053	0.336938	0.334516	0.76403	0.293549	0.867438	0.154629
0.925279	1.824	0.923732	1.56902	0.336715	0.333766	0.762694	0.294441	0.865351	0.153713
0.926112	1.82388	0.923959	1.5689	0.337852	0.331753	0.761973	0.295892	0.864704	0.154036
0.926944	1.82175	0.924302	1.56677	0.339519	0.331779	0.762762	0.296272	0.865123	0.155402
0.927777	1.82179	0.925029	1.56681	0.340341	0.332929	0.763598	0.29665	0.864657	0.155387
0.928609	1.82045	0.925821	1.56547	0.340213	0.331964	0.764843	0.296281	0.864786	0.154144
0.929442	1.81902	0.926658	1.56404	0.339463	0.331857	0.766373	0.296603	0.865879	0.154836
0.930274	1.81787	0.92752	1.56289	0.338672	0.33095	0.767448	0.295636	0.866401	0.153575
0.931107	1.81557	0.927451	1.56059	0.338699	0.330117	0.766662	0.296738	0.867291	0.152322
0.931939	1.81676	0.926805	1.56178	0.339299	0.330733	0.765222	0.296817	0.867146	0.151662
0.932772	1.81485	0.926761	1.55987	0.338371	0.331587	0.764079	0.296582	0.866807	0.151578
0.933604	1.81526	0.926854	1.56028	0.337621	0.33137	0.7633	0.296053	0.867379	0.151951
0.934437	1.81279	0.927505	1.55781	0.337737	0.330485	0.765327	0.294976	0.867355	0.152088
0.935269	1.8106	0.927983	1.55562	0.337661	0.330473	0.766801	0.297046	0.867815	0.151589
0.936102	1.8084	0.927575	1.55342	0.337775	0.331925	0.766417	0.298428	0.868484	0.149895
0.936934	1.80799	0.92761	1.55301	0.337779	0.332331	0.76584	0.298172	0.870298	0.149732
0.937767	1.80606	0.927179	1.55108	0.337804	0.332064	0.76586	0.297055	0.871322	0.14802
0.938599	1.80572	0.92686	1.55074	0.337627	0.33205	0.765204	0.296769	0.870873	0.147687
0.939432	1.80418	0.926967	1.5492	0.338054	0.332474	0.764143	0.297967	0.869955	0.146008
0.940264	1.80398	0.926469	1.549	0.338565	0.332729	0.765064	0.298241	0.86896	0.14675
0.941097	1.80431	0.925374	1.54933	0.338296	0.331549	0.76594	0.299464	0.867743	0.146942
0.941929	1.80495	0.92414	1.54997	0.337896	0.330791	0.765746	0.29788	0.868348	0.147367
0.942762	1.80522	0.923766	1.55024	0.338018	0.330922	0.763642	0.296128	0.869591	0.146399
0.943594	1.80449	0.924228	1.54951	0.338044	0.332002	0.760777	0.296868	0.868596	0.145349
0.944427	1.80401	0.92476	1.54903	0.33842	0.332096	0.759451	0.297586	0.868475	0.146365
0.945259	1.80257	0.925489	1.54759	0.339328	0.331906	0.759205	0.298391	0.869943	0.147624
0.946092	1.80277	0.9257	1.54779	0.339404	0.331339	0.75901	0.297761	0.872091	0.148064
0.946924	1.80278	0.925473	1.5478	0.338176	0.333386	0.759362	0.297504	0.873496	0.148127
0.947757	1.80306	0.925317	1.54808	0.335782	0.334184	0.759414	0.29694	0.873301	0.148873
0.948589	1.8019	0.925359	1.54692	0.334762	0.334175	0.760218	0.296376	0.872787	0.148618
0.949422	1.80104	0.925988	1.54606	0.33405	0.334568	0.760428	0.295659	0.872767	0.151349
0.950254	1.80043	0.926421	1.54545	0.333821	0.334521	0.759021	0.296058	0.874473	0.150355
0.951087	1.80074	0.927148	1.54576	0.333831	0.334462	0.758013	0.296205	0.875531	0.150141
0.951919	1.80194	0.928855	1.54696	0.333581	0.335133	0.758333	0.294896	0.874679	0.150519
0.952752	1.80028	0.930108	1.5453	0.332753	0.334284	0.758977	0.294569	0.874033	0.15209
0.953584	1.79786	0.930272	1.54288	0.332103	0.333261	0.759408	0.293946	0.873406	0.151527
0.954417	1.7949	0.929937	1.53992	0.33129	0.332986	0.759876	0.294737	0.872773	0.150738
0.955249	1.79496	0.930049	1.53998	0.331151	0.333115	0.757736	0.296378	0.872893	0.150362
0.956082	1.79472	0.930499	1.53974	0.331313	0.333415	0.75662	0.295413	0.872253	0.150834
0.956914	1.7937	0.930207	1.53872	0.330482	0.332795	0.756777	0.294337	0.872246	0.152188
0.957747	1.79152	0.930103	1.53654	0.329354	0.333352	0.755628	0.294585	0.870997	0.152596
0.958579	1.79101	0.930528	1.53603	0.328061	0.333509	0.755097	0.294436	0.869867	0.154005
0.959412	1.7886	0.930747	1.53362	0.327598	0.33273	0.756545	0.294567	0.869585	0.153892
0.960244	1.7886	0.931365	1.53362	0.327573	0.332428	0.757943	0.294107	0.868785	0.155002
0.961077	1.7871	0.931813	1.53212	0.327037	0.33187	0.758657	0.292634	0.869073	0.154737
0.961909	1.7862	0.932807	1.53122	0.326911	0.332361	0.758596	0.291167	0.870018	0.156013
0.962742	1.78542	0.934896	1.53044	0.327268	0.333276	0.757109	0.292101	0.870705	0.156662
0.963574	1.78391	0.935983	1.52893	0.327054	0.333164	0.757075	0.292671	0.871975	0.158023
0.964407	1.78298	0.93597	1.528	0.326654	0.332765	0.758818	0.291718	0.87308	0.157623
0.965239	1.78184	0.935847	1.52686	0.326617	0.332564	0.759616	0.291545	0.874081	0.155929
0.966072	1.78054	0.935697	1.52556	0.32669	0.331854	0.760021	0.291475	0.873712	0.153188
0.966904	1.77783	0.934867	1.52285	0.32619	0.332218	0.759875	0.29221	0.872949	0.152563
0.967737	1.77568	0.935268	1.5207	0.325729	0.331508	0.759184	0.292706	0.873409	0.150804
0.968569	1.77387	0.93584	1.51889	0.325584	0.329738	0.758999	0.293828	0.873712	0.148972
0.969402	1.77322	0.936208	1.51824	0.325223	0.3281	0.758266	0.293824	0.87288	0.151046
0.970234	1.7715	0.935977	1.51652	0.325381	0.326422	0.756631	0.294426	0.870149	0.148896
0.971067	1.77177	0.935373	1.51679	0.325414	0.326724	0.756303	0.295825	0.866757	0.149635
0.971899	1.77175	0.935462	1.51677	0.325669	0.326897	0.756602	0.297191	0.864845	0.148954
0.972732	1.77028	0.934867	1.5153	0.326238	0.325886	0.756687	0.296567	0.864504	0.149705
0.973564	1.77084	0.935548	1.51586	0.327466	0.325409	0.756197	0.295004	0.863259	0.148598
0.974397	1.77173	0.936862	1.51675	0.329196	0.326231	0.756052	0.295426	0.862522	0.149522
0.975229	1.77185	0.937947	1.51687	0.33043	0.326609	0.756976	0.294871	0.861578	0.14845
0.976062	1.77024	0.938632	1.51526	0.331002	0.324787	0.759294	0.295744	0.860806	0.148308
0.976894	1.76912	0.939084	1.51414	0.33106	0.32387	0.759867	0.296191	0.862252	0.146727
0.977727	1.76873	0.940538	1.51375	0.331815	0.323779	0.758948	0.294485	0.862343	0.144794
0.978559	1.76911	0.941684	1.51413	0.331998	0.323666	0.75846	0.293956	0.861184	0.145346
0.979392	1.76834	0.942235	1.51336	0.332643	0.324191	0.757107	0.296317	0.860415	0.144159
0.980224	1.76894	0.94296	1.51396	0.334127	0.325178	0.754999	0.297545	0.859062	0.143129
0.981057	1.76816	0.943439	1.51318	0.335124	0.325634	0.754185	0.296994	0.858295	0.142267
0.981889	1.76736	0.943765	1.51238	0.33632	0.327217	0.753755	0.297609	0.858268	0.14223
0.982722	1.76721	0.943715	1.51223	0.336198	0.327986	0.753965	0.299844	0.859432	0.141808
0.983554	1.76393	0.942546	1.50895	0.335426	0.328645	0.755489	0.300892	0.858494	0.143042
0.984387	1.76214	0.941247	1.50716	0.33604	0.328072	0.756092	0.301889	0.857159	0.142198
0.985219	1.76007	0.941606	1.50509	0.337091	0.327902	0.755511	0.302371	0.855439	0.142462
0.986052	1.75763	0.941879	1.50265	0.337344	0.32783	0.754893	0.30273	0.855659	0.142507
0.986884	1.75506	0.942142	1.50008	0.337619	0.329051	0.75442	0.301416	0.856187	0.144674
0.987717	1.75485	0.94366	1.49987	0.338231	0.32942	0.755643	0.301979	0.856258	0.144986
0.988549	1.75267	0.943881	1.49769	0.339206	0.32886	0.7567	0.300974	0.856589	0.145789
0.989382	1.75059	0.944223	1.49561	0.340697	0.329464	0.754798	0.300252	0.855906	0.144353
0.990214	1.74934	0.9446	1.49436	0.342031	0.329796	0.753736	0.301174	0.856989	0.143489
0.991047	1.7481	0.944953	1.49312	0.342328	0.330777	0.754793	0.301321	0.859475	0.14411
0.991879	1.74664	0.945775	1.49166	0.342698	0.330611	0.755483	0.299991	0.861486	0.142395
0.992712	1.74362	0.945951	1.48864	0.342838	0.330392	0.755932	0.297409	0.860155	0.14211
0.993544	1.74145	0.946244	1.48647	0.34142	0.329606	0.755094	0.29723	0.859869	0.140995
0.994377	1.73749	0.945729	1.48251	0.339908	0.330507	0.753856	0.298796	0.861054	0.139658
0.995209	1.73488	0.945287	1.4799	0.339153	0.330246	0.75309	0.299796	0.861439	0.139567
0.996042	1.73418	0.945388	1.4792	0.339091	0.328916	0.751873	0.300397	0.860953	0.139974
0.996874	1.73307	0.944776	1.47809	0.33825	0.329574	0.750621	0.29932	0.860146	0.139076
0.997707	1.73272	0.944108	1.47774	0.337098	0.329261	0.749791	0.299975	0.859446	0.139917
0.998539	1.73148	0.944802	1.4765	0.336137	0.328761	0.750781	0.301755	0.859452	0.140054
0.999372	1.72844	0.945895	1.47346	0.33607	0.328689	0.751672	0.30252	0.860769	0.13897
1.0002	1.72683	0.946807	1.47185	0.336135	0.328378	0.752742	0.301155	0.861661	0.139374
1.00104	1.72662	0.94666	1.47164	0.33467	0.32763	0.754305	0.30045	0.862223	0.139852
1.00187	1.72571	0.946334	1.47073	0.333032	0.327206	0.755387	0.299618	0.864383	0.140291
1.0027	1.72375	0.947484	1.46877	0.331559	0.326594	0.755223	0.299319	0.865137	0.138931
1.00353	1.72172	0.949931	1.46674	0.332343	0.325712	0.75523	0.298484	0.864197	0.13793
1.00437	1.72534	0.952619	1.47036	0.331397	0.322307	0.765042	0.297268	0.867497	0.133386
1.0052	1.72489	0.95292	1.46991	0.333066	0.322333	0.769581	0.298627	0.872284	0.133437
1.00603	1.72569	0.953241	1.47071	0.332214	0.321999	0.769436	0.298774	0.871609	0.134157
1.00686	1.72474	0.953317	1.46976	0.333638	0.32179	0.769561	0.297753	0.871678	0.134639
1.0077	1.72465	0.952943	1.46967	0.333165	0.321964	0.769751	0.297834	0.873867	0.135203
1.00853	1.72601	0.952918	1.47103	0.333619	0.322683	0.77022	0.29804	0.876375	0.135913
1.00936	1.72748	0.952848	1.4725	0.332759	0.324192	0.771295	0.299503	0.878089	0.136715
1.01019	1.72925	0.953584	1.47427	0.333192	0.325122	0.771535	0.298604	0.880099	0.137134
1.01103	1.72751	0.953759	1.47253	0.334119	0.324558	0.772688	0.298184	0.882789	0.137519
1.01186	1.72621	0.953696	1.47123	0.333957	0.323487	0.772647	0.29895	0.886485	0.137124
1.01269	1.72593	0.954337	1.47095	0.334108	0.323125	0.774078	0.298931	0.887841	0.137666
1.01352	1.72567	0.955234	1.47069	0.333734	0.324335	0.775649	0.29891	0.887394	0.137689
1.01436	1.72761	0.956075	1.47263	0.334544	0.32481	0.775401	0.299925	0.888033	0.136687
1.01519	1.72854	0.954875	1.47356	0.335542	0.324189	0.775617	0.300152	0.889145	0.137175
1.01602	1.72718	0.953689	1.4722	0.334897	0.323663	0.775246	0.29992	0.890518	0.137591
1.01685	1.72695	0.952316	1.47197	0.334163	0.323167	0.775189	0.301073	0.890182	0.137808
1.01769	1.72682	0.951305	1.47184	0.334569	0.322457	0.776242	0.300633	0.890323	0.138045
1.01852	1.72853	0.95083	1.47355	0.335572	0.321994	0.775861	0.30293	0.891468	0.137774
1.01935	1.73083	0.95069	1.47585	0.33603	0.32242	0.774942	0.30273	0.891943	0.13806
1.02018	1.72976	0.950036	1.47478	0.33652	0.323108	0.773873	0.302704	0.891973	0.138185
1.02102	1.72942	0.949222	1.47444	0.334949	0.322134	0.774661	0.301004	0.893457	0.139269
1.02185	1.7292	0.948276	1.47422	0.333846	0.320814	0.776802	0.301834	0.894899	0.139864
1.02268	1.72814	0.949308	1.47316	0.33376	0.321056	0.777908	0.302257	0.894988	0.139779
1.02351	1.72774	0.949653	1.47276	0.333251	0.321127	0.776967	0.302596	0.894	0.141178
1.02435	1.72754	0.950685	1.47256	0.332891	0.319885	0.775813	0.304333	0.892755	0.142151
1.02518	1.72862	0.950996	1.47364	0.331462	0.318755	0.773699	0.304134	0.892314	0.143111
1.02601	1.72901	0.950488	1.47403	0.330198	0.318309	0.774194	0.304105	0.891251	0.144389
1.02684	1.72788	0.951038	1.4729	0.330505	0.318714	0.775512	0.304094	0.890683	0.145215
1.02768	1.72726	0.950759	1.47228	0.328231	0.319058	0.775358	0.304971	0.890133	0.144441
1.02851	1.72765	0.950036	1.47267	0.326713	0.318238	0.775102	0.305704	0.888104	0.144118
1.02934	1.72605	0.949502	1.47107	0.325816	0.317379	0.775674	0.305921	0.886867	0.145005
1.03017	1.72486	0.948482	1.46988	0.326463	0.317363	0.775785	0.305742	0.885551	0.146353
1.03101	1.72486	0.947353	1.46988	0.326032	0.31733	0.77597	0.306163	0.884724	0.146789
1.03184	1.72607	0.947231	1.47109	0.325208	0.316981	0.774414	0.30519	0.884771	0.147076
1.03267	1.72465	0.94873	1.46967	0.325219	0.318032	0.773696	0.304587	0.883229	0.147565
1.0335	1.72244	0.947849	1.46746	0.324878	0.319519	0.772674	0.305294	0.881886	0.147902
1.03434	1.7216	0.94671	1.46662	0.323739	0.319688	0.771322	0.30614	0.881739	0.148408
1.03517	1.72039	0.947145	1.46541	0.323343	0.31918	0.771768	0.304961	0.881203	0.149809
1.036	1.71979	0.947421	1.46481	0.322473	0.319295	0.771417	0.305929	0.88	0.150948
1.03683	1.71988	0.948293	1.4649	0.32241	0.319872	0.772802	0.305713	0.878897	0.150193
1.03767	1.71762	0.950896	1.46264	0.323066	0.31976	0.773458	0.304679	0.879586	0.149805
1.0385	1.71854	0.952283	1.46356	0.321943	0.319448	0.773153	0.304942	0.879443	0.149812
1.03933	1.71679	0.954671	1.46181	0.322126	0.31947	0.773802	0.304244	0.879737	0.150794
1.04016	1.7131	0.954164	1.45812	0.322068	0.319158	0.77419	0.304275	0.879832	0.151894
1.041	1.71077	0.953613	1.45579	0.320831	0.319138	0.774051	0.303451	0.879867	0.152921
1.04183	1.71095	0.954782	1.45597	0.322219	0.319868	0.771181	0.302304	0.878924	0.153329
1.04266	1.71076	0.953565	1.45578	0.323583	0.320327	0.76811	0.301538	0.87708	0.154147
1.04349	1.71027	0.953199	1.45529	0.324826	0.320525	0.766473	0.301726	0.876625	0.153741
1.04433	1.70817	0.953647	1.45319	0.325071	0.321509	0.766109	0.300812	0.877856	0.152215
1.04516	1.70703	0.953706	1.45205	0.324605	0.322762	0.766573	0.300002	0.878783	0.150188
1.04599	1.70466	0.954816	1.44968	0.323867	0.324382	0.768278	0.301366	0.876739	0.150067
1.04682	1.70295	0.955962	1.44797	0.322883	0.324753	0.767805	0.301092	0.874257	0.149877
1.04766	1.70293	0.956985	1.44795	0.322356	0.324381	0.764703	0.300987	0.873817	0.149427
1.04849	1.70347	0.958131	1.44849	0.322969	0.324348	0.762794	0.300581	0.873894	0.149869
1.04932	1.70138	0.959781	1.4464	0.32487	0.325127	0.762998	0.30014	0.874478	0.150578
1.05015	1.70077	0.961646	1.44579	0.325639	0.324607	0.762644	0.300997	0.873944	0.150309
1.05099	1.69979	0.963149	1.44481	0.324067	0.323729	0.763477	0.301429	0.87395	0.150045
1.05182	1.69674	0.962737	1.44176	0.325488	0.322392	0.76419	0.302163	0.87422	0.150851
1.05265	1.69368	0.962766	1.4387	0.326995	0.321432	0.765532	0.303159	0.873101	0.151107
1.05348	1.69356	0.962228	1.43858	0.327289	0.319781	0.766674	0.302689	0.872161	0.150496
1.05432	1.69372	0.963252	1.43874	0.326032	0.318455	0.766832	0.302328	0.872637	0.150743
1.05515	1.69377	0.964688	1.43879	0.328025	0.31785	0.768086	0.301546	0.872588	0.15086
1.05598	1.69317	0.964734	1.43819	0.328641	0.317712	0.768336	0.30018	0.872001	0.150221
1.05681	1.69176	0.964776	1.43678	0.328508	0.317532	0.768516	0.299171	0.872742	0.148231
1.05765	1.69081	0.963498	1.43583	0.328668	0.317131	0.767621	0.299487	0.873283	0.148288
1.05848	1.68995	0.961475	1.43497	0.328754	0.317342	0.766968	0.300909	0.872092	0.148587
1.05931	1.68715	0.961559	1.43217	0.329251	0.318581	0.764252	0.301834	0.870768	0.148553
1.06014	1.68573	0.9603	1.43075	0.327815	0.319171	0.762312	0.30113	0.86913	0.147871
1.06098	1.6863	0.960656	1.43132	0.328416	0.318927	0.761869	0.301502	0.868338	0.146857
1.06181	1.68666	0.959987	1.43168	0.329755	0.318724	0.760953	0.301628	0.867743	0.14564
1.06264	1.68501	0.960136	1.43003	0.327352	0.318635	0.761034	0.302774	0.868055	0.144455
1.06347	1.68231	0.96055	1.42733	0.326139	0.319016	0.762125	0.304465	0.869355	0.143468
1.06431	1.68114	0.960592	1.42616	0.325982	0.318934	0.762001	0.304507	0.868502	0.143353
1.06514	1.68129	0.96008	1.42631	0.325469	0.318306	0.761491	0.304775	0.866169	0.142841
1.06597	1.68048	0.959918	1.4255	0.324699	0.3185	0.760621	0.304458	0.864392	0.143641
1.0668	1.67992	0.95811	1.42494	0.325629	0.317783	0.758726	0.303968	0.865686	0.143484
1.06764	1.67851	0.957063	1.42353	0.326245	0.317468	0.756021	0.302852	0.868114	0.142667
1.06847	1.676	0.955838	1.42102	0.324239	0.318009	0.755325	0.303124	0.869743	0.142034
1.0693	1.67437	0.954547	1.41939	0.324353	0.317618	0.755079	0.303685	0.871809	0.141789
1.07013	1.67277	0.954019	1.41779	0.322755	0.317234	0.753876	0.303084	0.873783	0.141662
1.07097	1.67029	0.952415	1.41531	0.321813	0.318043	0.752659	0.302244	0.874473	0.141093
1.0718	1.66709	0.952615	1.41212	0.32253	0.318195	0.750834	0.302475	0.872604	0.13952
1.07263	1.66608	0.954871	1.4111	0.319579	0.319508	0.749186	0.302097	0.871746	0.138571
1.07346	1.66526	0.955312	1.41028	0.318059	0.321062	0.748828	0.302372	0.871301	0.138479
1.0743	1.66326	0.954669	1.40829	0.316995	0.322611	0.747414	0.301555	0.86936	0.138018
1.07513	1.65953	0.954412	1.40455	0.317144	0.323069	0.74595	0.302002	0.868731	0.136753
1.07596	1.65544	0.954284	1.40046	0.315747	0.322976	0.743388	0.30174	0.870036	0.136706
1.07679	1.65317	0.953691	1.39819	0.314319	0.323965	0.740813	0.302876	0.871197	0.137638
1.07763	1.65194	0.954135	1.39697	0.314212	0.324069	0.73851	0.302713	0.871136	0.138718
1.07846	1.64928	0.954591	1.3943	0.313415	0.323272	0.737411	0.302337	0.871515	0.13891
1.07929	1.64714	0.955323	1.39216	0.312368	0.323194	0.736715	0.301633	0.870354	0.138357
1.08012	1.64602	0.955693	1.39104	0.310764	0.322735	0.738154	0.299829	0.869221	0.13843
1.08096	1.64509	0.956483	1.39011	0.310899	0.321424	0.740109	0.29935	0.869797	0.139602
1.08179	1.64301	0.95709	1.38803	0.309707	0.320061	0.740273	0.30013	0.87054	0.140663
1.08262	1.6421	0.958215	1.38712	0.308761	0.319179	0.742245	0.300652	0.871118	0.141418
1.08345	1.64151	0.958272	1.38653	0.308816	0.319125	0.743456	0.301091	0.870184	0.141571
1.08429	1.64137	0.958924	1.38639	0.307531	0.318242	0.743327	0.299266	0.869286	0.14158
1.08512	1.64	0.959365	1.38502	0.305995	0.317554	0.743024	0.29906	0.869631	0.142135
1.08595	1.63762	0.961406	1.38264	0.306594	0.31727	0.742433	0.298603	0.869543	0.143836
1.08678	1.63497	0.962796	1.37999	0.307958	0.316229	0.742416	0.297542	0.869537	0.144274
1.08762	1.632	0.963245	1.37702	0.307206	0.316028	0.740966	0.297118	0.867521	0.143981
1.08845	1.6295	0.964027	1.37452	0.306863	0.31553	0.741225	0.298574	0.865051	0.144106
1.08928	1.62905	0.964463	1.37407	0.309528	0.315264	0.742467	0.297867	0.86407	0.144017
1.09011	1.62755	0.965223	1.37257	0.308358	0.315732	0.744075	0.297709	0.862175	0.143881
1.09095	1.62676	0.965274	1.37178	0.309529	0.315337	0.74429	0.297692	0.86042	0.143894
1.09178	1.62644	0.965713	1.37146	0.311021	0.314471	0.744345	0.298492	0.861427	0.14432
1.09261	1.62682	0.96528	1.37184	0.3112	0.314202	0.745483	0.298316	0.863585	0.1456
1.09344	1.62579	0.963906	1.37081	0.31269	0.313172	0.74733	0.298198	0.863844	0.145765
1.09428	1.62536	0.965104	1.37038	0.314208	0.311896	0.747394	0.298149	0.862675	0.145609
1.09511	1.62573	0.965585	1.37075	0.314729	0.311432	0.747415	0.29882	0.864134	0.146384
1.09594	1.62684	0.96524	1.37186	0.314031	0.31119	0.746839	0.298413	0.864215	0.146369
1.09677	1.62796	0.965032	1.37298	0.314361	0.310141	0.748728	0.297914	0.862289	0.145992
1.09761	1.62678	0.966699	1.3718	0.315286	0.308543	0.749104	0.296531	0.860522	0.144756
1.09844	1.62464	0.968238	1.36966	0.316194	0.308399	0.750302	0.295048	0.858956	0.144765
1.09927	1.62338	0.968312	1.3684	0.317073	0.307932	0.750664	0.294943	0.858477	0.145081
1.1001	1.62345	0.969552	1.36847	0.317893	0.307502	0.750633	0.293928	0.859363	0.145749
1.10094	1.62333	0.969306	1.36835	0.319465	0.306571	0.749531	0.293796	0.858944	0.14571
1.10177	1.62105	0.968932	1.36607	0.320436	0.306641	0.747645	0.293031	0.857561	0.145157
1.1026	1.61842	0.968921	1.36344	0.320077	0.306942	0.747186	0.291884	0.856079	0.144067
1.10343	1.61607	0.969592	1.36109	0.322034	0.30718	0.745768	0.290723	0.85541	0.143657
1.10427	1.61403	0.969735	1.35905	0.322511	0.307044	0.744014	0.291521	0.85514	0.143569
1.1051	1.61225	0.969741	1.35727	0.32425	0.30778	0.743353	0.291116	0.854926	0.143664
1.10593	1.6106	0.970273	1.35562	0.325824	0.308502	0.74276	0.291966	0.852902	0.143488
1.10676	1.60842	0.969354	1.35344	0.32488	0.308157	0.74396	0.29339	0.853478	0.142563
1.1076	1.60634	0.968637	1.35136	0.323659	0.308978	0.744442	0.294336	0.854263	0.141972
1.10843	1.60613	0.969987	1.35115	0.323745	0.309522	0.746175	0.294154	0.856714	0.141276
1.10926	1.60616	0.970607	1.35118	0.322761	0.310647	0.747308	0.292941	0.857853	0.141022
1.11009	1.60476	0.970288	1.34978	0.32126	0.311531	0.747305	0.293887	0.85697	0.140884
1.11093	1.60218	0.972167	1.3472	0.322314	0.310546	0.74625	0.29331	0.855445	0.140531
1.11176	1.59899	0.972738	1.34401	0.321201	0.310463	0.745656	0.294288	0.853127	0.140353
1.11259	1.59647	0.972524	1.34149	0.320558	0.310498	0.745282	0.293031	0.850574	0.140267
1.11342	1.59471	0.971414	1.33973	0.32059	0.309944	0.745076	0.291971	0.848536	0.140184
1.11426	1.5933	0.972072	1.33832	0.319726	0.310178	0.743445	0.293406	0.846863	0.140869
1.11509	1.59207	0.972291	1.33709	0.318189	0.310044	0.743365	0.29198	0.848504	0.140844
1.11592	1.5899	0.973895	1.33492	0.317435	0.30858	0.744522	0.291387	0.848403	0.140923
1.11675	1.58822	0.975616	1.33324	0.318362	0.307641	0.745831	0.29054	0.847533	0.141901
1.11759	1.58744	0.97515	1.33246	0.31768	0.308157	0.745096	0.292151	0.846763	0.141986
1.11842	1.58708	0.974904	1.3321	0.317546	0.308603	0.746618	0.293748	0.846515	0.14258
1.11925	1.58644	0.973962	1.33146	0.316383	0.308306	0.746627	0.295941	0.84633	0.143001
1.12008	1.58571	0.974214	1.33073	0.316793	0.308777	0.747121	0.296294	0.846235	0.142394
1.12092	1.58442	0.972264	1.32944	0.315854	0.30976	0.746197	0.296563	0.84675	0.141664
1.12175	1.58221	0.971818	1.32723	0.314054	0.310934	0.746237	0.298098	0.846548	0.140367
1.12258	1.58138	0.972537	1.3264	0.312755	0.310225	0.746647	0.299782	0.845807	0.140314
1.12341	1.58099	0.972219	1.32601	0.313396	0.309869	0.74606	0.299785	0.846419	0.141549
1.12425	1.57876	0.971675	1.32378	0.311349	0.309933	0.743065	0.299726	0.846189	0.142025
1.12508	1.57743	0.972112	1.32245	0.311435	0.310708	0.742693	0.298777	0.846834	0.142126
1.12591	1.57687	0.973714	1.32189	0.310033	0.311431	0.742232	0.300831	0.846374	0.14243
1.12674	1.57553	0.973355	1.32055	0.309779	0.310844	0.741143	0.300177	0.84828	0.142453
1.12758	1.57499	0.973104	1.32001	0.309827	0.311551	0.740414	0.301582	0.848669	0.142033
1.12841	1.57584	0.972585	1.32086	0.309077	0.31128	0.74034	0.303062	0.84827	0.141921
1.12924	1.57584	0.972448	1.32086	0.309011	0.310537	0.740571	0.303009	0.847749	0.142647
1.13007	1.57475	0.972293	1.31977	0.309165	0.310291	0.741579	0.303488	0.847488	0.143414
1.13091	1.57318	0.97191	1.3182	0.31055	0.309478	0.74157	0.302989	0.847327	0.143803
1.13174	1.57272	0.971519	1.31774	0.308612	0.309738	0.741168	0.302997	0.848074	0.143393
1.13257	1.57369	0.97244	1.31871	0.308433	0.309597	0.742149	0.302427	0.849089	0.141854
1.1334	1.57345	0.973951	1.31847	0.308599	0.30946	0.742615	0.302902	0.849429	0.141444
1.13424	1.57201	0.974729	1.31703	0.308351	0.310316	0.742116	0.304039	0.849039	0.140431
1.13507	1.57035	0.974611	1.31537	0.308225	0.311182	0.742092	0.302174	0.850437	0.139361
1.1359	1.5689	0.975211	1.31392	0.308562	0.312061	0.740729	0.302658	0.849498	0.138744
1.13673	1.56883	0.974788	1.31385	0.308721	0.312237	0.738694	0.303835	0.848676	0.138883
1.13757	1.56933	0.974012	1.31435	0.308128	0.312006	0.738011	0.304645	0.848288	0.139205
1.1384	1.56866	0.974986	1.31368	0.30737	0.312377	0.736994	0.303848	0.848773	0.139295
1.13923	1.56776	0.974252	1.31278	0.307613	0.312244	0.735693	0.303531	0.849794	0.139658
1.14006	1.56729	0.974927	1.31231	0.307809	0.311759	0.736221	0.303062	0.850742	0.139783
1.1409	1.56721	0.975438	1.31223	0.306743	0.310806	0.7347	0.304854	0.850777	0.140604
1.14173	1.56627	0.976518	1.31129	0.305686	0.309255	0.733452	0.305059	0.848933	0.1406
1.14256	1.56434	0.97659	1.30936	0.306934	0.308321	0.733261	0.304074	0.849033	0.143302
1.14339	1.56375	0.976144	1.30877	0.306867	0.309388	0.732663	0.303088	0.849318	0.142826
1.14423	1.56405	0.976501	1.30907	0.306821	0.31094	0.731954	0.302848	0.846788	0.142009
1.14506	1.56535	0.977439	1.31037	0.307721	0.310852	0.734216	0.304309	0.845653	0.142598
1.14589	1.56533	0.977643	1.31035	0.30783	0.30945	0.734487	0.305691	0.84529	0.143604
1.14672	1.56363	0.977561	1.30865	0.30841	0.308616	0.735732	0.304371	0.844802	0.143929
1.14756	1.56298	0.977191	1.308	0.309062	0.308206	0.735637	0.303509	0.843569	0.143345
1.14839	1.5637	0.976987	1.30872	0.309734	0.307875	0.734928	0.301868	0.843893	0.145536
1.14922	1.56217	0.978175	1.30719	0.311935	0.307806	0.734588	0.301771	0.843066	0.146136
1.15005	1.5591	0.978126	1.30412	0.313102	0.307788	0.734302	0.302582	0.841697	0.145622
1.15089	1.55813	0.97774	1.30315	0.313323	0.307516	0.732483	0.303329	0.842311	0.145069
1.15172	1.55774	0.978728	1.30276	0.312259	0.30687	0.730463	0.30444	0.842647	0.145344
1.15255	1.55747	0.978084	1.30249	0.311925	0.305982	0.732238	0.305782	0.840835	0.146509
1.15338	1.5573	0.977138	1.30232	0.312562	0.305522	0.731259	0.305528	0.840628	0.147577
1.15422	1.55692	0.976093	1.30194	0.311832	0.304863	0.732303	0.305198	0.840049	0.147857
1.15505	1.55567	0.976722	1.30069	0.312089	0.304962	0.733266	0.304532	0.841122	0.148711
1.15588	1.55397	0.97714	1.29899	0.312343	0.303989	0.733305	0.304774	0.840898	0.14939
1.15671	1.55272	0.975873	1.29774	0.31198	0.303576	0.733595	0.30622	0.841529	0.150618
1.15755	1.55141	0.974845	1.29643	0.311872	0.303161	0.733091	0.305918	0.843061	0.150474
1.15838	1.5488	0.97581	1.29382	0.312934	0.303393	0.732602	0.3056	0.843893	0.150668
1.15921	1.54558	0.975723	1.2906	0.311343	0.302904	0.731793	0.305511	0.844672	0.151615
1.16004	1.54352	0.976079	1.28854	0.310697	0.302757	0.731847	0.304887	0.84384	0.151909
1.16088	1.54214	0.976388	1.28716	0.310029	0.30352	0.730762	0.304191	0.844582	0.151612
1.16171	1.54095	0.976918	1.28597	0.309844	0.304691	0.730781	0.302394	0.843971	0.151006
1.16254	1.5407	0.977895	1.28572	0.311504	0.305312	0.731083	0.301655	0.843844	0.151152
1.16337	1.54161	0.978921	1.28663	0.31043	0.304985	0.730956	0.303478	0.843636	0.149411
1.16421	1.53971	0.979284	1.28473	0.311498	0.304571	0.730415	0.304093	0.844292	0.148976
1.16504	1.53659	0.979816	1.28161	0.309898	0.302857	0.731451	0.304079	0.846178	0.149016
1.16587	1.53433	0.980586	1.27935	0.307782	0.302086	0.731763	0.303089	0.847004	0.147176
1.1667	1.53275	0.980773	1.27777	0.307445	0.30279	0.732284	0.299878	0.844591	0.145273
1.16754	1.5319	0.980474	1.27692	0.306627	0.303005	0.730755	0.29904	0.845041	0.144961
1.16837	1.53117	0.98129	1.27618	0.304822	0.303948	0.731769	0.300079	0.845456	0.145508
1.1692	1.52917	0.982087	1.27419	0.30445	0.303942	0.73278	0.298087	0.844073	0.14421
1.17003	1.52669	0.983621	1.27171	0.302839	0.303681	0.730304	0.296639	0.843162	0.143645
1.17087	1.52601	0.9827	1.27103	0.300918	0.303573	0.727916	0.295876	0.843628	0.143665
1.1717	1.52562	0.983182	1.27064	0.301049	0.303629	0.72886	0.294657	0.842782	0.144369
1.17253	1.52473	0.983056	1.26975	0.300248	0.304385	0.730192	0.29276	0.84245	0.144808
1.17336	1.52336	0.982705	1.26838	0.300685	0.305873	0.728165	0.29152	0.844323	0.145286
1.1742	1.52041	0.982261	1.26543	0.299653	0.307121	0.727246	0.291893	0.845318	0.145382
1.17503	1.51856	0.983066	1.26358	0.299777	0.308407	0.724887	0.289851	0.845662	0.145788
1.17586	1.51838	0.983726	1.2634	0.298616	0.306706	0.723669	0.290233	0.845809	0.146012
1.17669	1.51859	0.983598	1.26361	0.297761	0.306499	0.723632	0.290659	0.845658	0.145643
1.17753	1.51829	0.983691	1.26331	0.29786	0.30637	0.723886	0.29009	0.84533	0.143322
1.17836	1.51619	0.984292	1.26121	0.297244	0.307434	0.724446	0.291054	0.84221	0.143165
1.17919	1.51468	0.985103	1.2597	0.297012	0.30826	0.723582	0.291535	0.840009	0.142412
1.18002	1.51412	0.985927	1.25914	0.297984	0.308556	0.725364	0.291729	0.840198	0.141792
1.18086	1.51316	0.986482	1.25818	0.297475	0.308614	0.725142	0.292019	0.841303	0.141301
1.18169	1.51254	0.985746	1.25756	0.298513	0.307456	0.726149	0.292743	0.840759	0.14073
1.18252	1.5114	0.985845	1.25642	0.298593	0.307021	0.726987	0.293233	0.838801	0.140787
1.18335	1.50889	0.986808	1.25391	0.29663	0.307714	0.727402	0.294332	0.838273	0.141348
1.18419	1.50673	0.986806	1.25175	0.296285	0.30908	0.725256	0.293766	0.838444	0.141351
1.18502	1.50652	0.988172	1.25154	0.296504	0.308938	0.723815	0.293467	0.838304	0.142045
1.18585	1.50664	0.987014	1.25166	0.296521	0.309471	0.722218	0.292773	0.838483	0.142317
1.18668	1.5055	0.986255	1.25052	0.297481	0.310425	0.720593	0.292609	0.839138	0.142651
1.18752	1.50302	0.986451	1.24804	0.297355	0.310934	0.720547	0.293704	0.841076	0.14489
1.18835	1.50112	0.986417	1.24614	0.297216	0.310231	0.719998	0.294544	0.841426	0.144632
1.18918	1.50119	0.986541	1.24621	0.296245	0.309369	0.719086	0.292816	0.839706	0.143459
1.19001	1.50061	0.986024	1.24563	0.29481	0.308678	0.718462	0.294335	0.838917	0.144162
1.19085	1.49996	0.984094	1.24498	0.294454	0.308045	0.72073	0.296243	0.838325	0.14515
1.19168	1.49936	0.985978	1.24438	0.293227	0.307725	0.723347	0.296583	0.839158	0.14521
1.19251	1.49751	0.986842	1.24253	0.292945	0.306669	0.722691	0.296981	0.839989	0.144871
1.19334	1.49567	0.986455	1.24069	0.292777	0.305979	0.7225	0.298283	0.839699	0.145848
1.19418	1.49417	0.986282	1.23919	0.292669	0.305795	0.722769	0.297684	0.838104	0.145541
1.19501	1.49269	0.988553	1.23771	0.292199	0.305203	0.724468	0.299006	0.837715	0.145835
1.19584	1.49098	0.98919	1.236	0.291135	0.303647	0.7238	0.301078	0.837263	0.146462
1.19667	1.49004	0.989865	1.23506	0.291013	0.30417	0.723921	0.301741	0.836259	0.147204
1.19751	1.48847	0.991866	1.23349	0.290811	0.304202	0.724193	0.301439	0.834902	0.147433
1.19834	1.48656	0.992873	1.23158	0.290137	0.304044	0.723079	0.302138	0.833872	0.149006
1.19917	1.48668	0.992631	1.2317	0.288949	0.304273	0.721711	0.301337	0.835956	0.149058
1.2	1.4869	0.991691	1.23192	0.288373	0.30386	0.720985	0.299796	0.836567	0.151165
1.20084	1.48622	0.992965	1.23124	0.289678	0.303951	0.720144	0.299426	0.835038	0.152237
1.20167	1.4851	0.993699	1.23012	0.290223	0.303901	0.717698	0.298811	0.833544	0.151984
1.2025	1.48363	0.994783	1.22865	0.288339	0.305189	0.716575	0.298241	0.832157	0.151772
1.20333	1.48297	0.995862	1.22799	0.288829	0.306097	0.715848	0.298234	0.833254	0.15181
1.20417	1.48272	0.993842	1.22774	0.289725	0.305857	0.714606	0.296581	0.833392	0.152077
1.205	1.4817	0.993724	1.22672	0.289615	0.305334	0.716519	0.294948	0.833444	0.152386
1.20583	1.48075	0.992862	1.22577	0.288188	0.305747	0.718497	0.29438	0.83409	0.153361
1.20666	1.47971	0.994891	1.22473	0.288978	0.304918	0.717639	0.295606	0.833945	0.154875
1.2075	1.47903	0.995662	1.22405	0.28745	0.303649	0.717438	0.296776	0.833311	0.156166
1.20833	1.47988	0.995935	1.2249	0.286437	0.302136	0.717387	0.297263	0.8345	0.155233
1.20916	1.4803	0.996391	1.22532	0.287116	0.301486	0.719262	0.297666	0.835211	0.155475
1.20999	1.47911	0.995803	1.22413	0.288081	0.3008	0.719087	0.298003	0.836144	0.155432
1.21083	1.47789	0.996564	1.22291	0.289172	0.301495	0.718227	0.299157	0.833879	0.154322
1.21166	1.47755	0.996827	1.22257	0.289693	0.302654	0.718242	0.299373	0.835364	0.153707
1.21249	1.47772	0.996614	1.22274	0.290931	0.303582	0.716856	0.299633	0.83436	0.154051
1.21332	1.47829	0.99628	1.22331	0.290525	0.30498	0.71661	0.299507	0.833296	0.153865
1.21416	1.47738	0.996894	1.2224	0.291013	0.30535	0.716576	0.298801	0.833465	0.15069
1.21499	1.47572	0.997918	1.22074	0.291524	0.304228	0.718204	0.299619	0.834716	0.148845
1.21582	1.47569	0.997274	1.22071	0.292733	0.303571	0.718467	0.299043	0.834589	0.148104
1.21665	1.47505	0.996963	1.22007	0.29251	0.304456	0.719776	0.298136	0.836385	0.14611
1.21749	1.47386	0.997134	1.21888	0.292657	0.304664	0.718927	0.298553	0.838011	0.145347
1.21832	1.47414	0.996516	1.21916	0.292894	0.304765	0.720414	0.298911	0.841497	0.143535
1.21915	1.4744	0.997049	1.21942	0.293117	0.305116	0.721445	0.297499	0.844344	0.143312
1.21998	1.47489	0.999208	1.21991	0.29469	0.304314	0.722479	0.297179	0.845673	0.140946
1.22082	1.475	1.00021	1.22002	0.293267	0.305291	0.725483	0.298391	0.849606	0.138797
1.22165	1.47457	0.999944	1.21959	0.292094	0.305137	0.727312	0.298495	0.850989	0.136867
1.22248	1.47463	1.00055	1.21965	0.291503	0.305045	0.730684	0.298923	0.851607	0.13721
1.22331	1.47352	1.00111	1.21854	0.292804	0.302944	0.731457	0.299943	0.85263	0.13797
1.22415	1.47256	1.0007	1.21758	0.291532	0.301915	0.732624	0.299738	0.853824	0.139386
1.22498	1.47153	1.00157	1.21655	0.291385	0.301806	0.733578	0.30021	0.855448	0.14038
1.22581	1.47087	1.0014	1.21589	0.291482	0.300173	0.734463	0.301472	0.855883	0.140437
1.22664	1.47002	1.00323	1.21504	0.292749	0.300242	0.735363	0.30195	0.854575	0.139431
1.22748	1.46868	1.00443	1.2137	0.292522	0.300245	0.739372	0.300882	0.854563	0.13912
1.22831	1.46708	1.00541	1.2121	0.293512	0.301116	0.741487	0.300922	0.855249	0.138845
1.22914	1.46402	1.0064	1.20904	0.294107	0.300576	0.741486	0.301013	0.856492	0.139486
1.22997	1.46129	1.0072	1.20631	0.29421	0.301198	0.7426	0.29948	0.85681	0.140267
1.23081	1.46015	1.00952	1.20517	0.29404	0.302511	0.746075	0.299489	0.857749	0.141641
1.23164	1.4595	1.01043	1.20452	0.293178	0.300897	0.748844	0.298695	0.860992	0.142268
1.23247	1.45867	1.01217	1.20369	0.292468	0.300424	0.749667	0.298843	0.86267	0.144172
1.2333	1.45748	1.01395	1.2025	0.293315	0.299175	0.751579	0.299193	0.864909	0.14443
1.23414	1.45533	1.01527	1.20035	0.29341	0.297552	0.753501	0.299564	0.866863	0.144717
1.23497	1.4545	1.01751	1.19952	0.292886	0.296612	0.755765	0.302009	0.867962	0.147119
1.2358	1.45487	1.01756	1.19989	0.292413	0.296589	0.753547	0.302583	0.869148	0.149245
1.23663	1.4552	1.01743	1.20022	0.290841	0.297153	0.752602	0.303354	0.86891	0.150145
1.23747	1.45645	1.01864	1.20147	0.29207	0.29669	0.753548	0.305101	0.868846	0.150715
1.2383	1.45639	1.01904	1.20141	0.292968	0.29652	0.756207	0.304629	0.868517	0.150014
1.23913	1.45479	1.01905	1.19981	0.293519	0.295544	0.755999	0.304966	0.869746	0.151643
1.23996	1.45372	1.01991	1.19874	0.293208	0.294426	0.755727	0.306805	0.870668	0.151682
1.2408	1.45196	1.02003	1.19698	0.292228	0.294784	0.757148	0.30656	0.870372	0.154362
1.24163	1.45046	1.02001	1.19548	0.293296	0.294401	0.756911	0.308101	0.86959	0.154685
1.24246	1.44991	1.02025	1.19493	0.294284	0.293831	0.757232	0.308429	0.870683	0.156449
1.24329	1.44837	1.0208	1.19339	0.29334	0.293988	0.758122	0.309092	0.872613	0.155687
1.24413	1.44712	1.0216	1.19214	0.292785	0.295778	0.76157	0.30937	0.873518	0.155039
1.24496	1.4461	1.02211	1.19112	0.293197	0.295169	0.761214	0.308913	0.873176	0.153853
1.24579	1.44495	1.0228	1.18997	0.293893	0.294531	0.764334	0.309629	0.872431	0.153877
1.24662	1.44268	1.02395	1.1877	0.294553	0.295678	0.766015	0.308696	0.873452	0.153715
1.24746	1.44048	1.02395	1.1855	0.293414	0.295727	0.766618	0.308129	0.874239	0.153791
1.24829	1.43942	1.02494	1.18444	0.294545	0.295185	0.766212	0.308839	0.876321	0.152023
1.24912	1.43899	1.02538	1.18401	0.294715	0.294436	0.765457	0.30874	0.877304	0.152712
1.24995	1.43907	1.02582	1.18409	0.294275	0.294267	0.765513	0.308763	0.877208	0.152596
1.25079	1.43864	1.0268	1.18366	0.293473	0.293679	0.766108	0.309308	0.877011	0.152419
1.25162	1.43667	1.02674	1.18169	0.29403	0.292907	0.763416	0.309643	0.878499	0.151157
1.25245	1.43564	1.02686	1.18066	0.294282	0.292426	0.762192	0.310832	0.880312	0.151386
1.25328	1.43573	1.02687	1.18075	0.293302	0.291815	0.761605	0.309172	0.880906	0.149682
1.25412	1.43565	1.02617	1.18067	0.2917	0.291431	0.76208	0.308921	0.880411	0.149913
1.25495	1.43505	1.02612	1.18007	0.29145	0.291865	0.76016	0.309971	0.88009	0.150337
1.25578	1.43361	1.02581	1.17863	0.292777	0.292775	0.75813	0.307252	0.87997	0.150254
1.25661	1.43151	1.02736	1.17653	0.292371	0.293576	0.760369	0.307273	0.88141	0.149931
1.25745	1.42978	1.02794	1.1748	0.293025	0.294471	0.761465	0.305343	0.883431	0.149361
1.25828	1.42915	1.02706	1.17417	0.291682	0.29393	0.761322	0.305278	0.88392	0.150383
1.25911	1.42899	1.02797	1.17401	0.291108	0.293825	0.76233	0.304335	0.883397	0.15013
1.25994	1.42829	1.02932	1.17331	0.290534	0.294289	0.761007	0.304665	0.880794	0.14942
1.26078	1.42736	1.02944	1.17238	0.291278	0.294635	0.761507	0.30368	0.879878	0.149734
1.26161	1.42591	1.02952	1.17093	0.292798	0.294487	0.760713	0.303178	0.880012	0.149938
1.26244	1.42495	1.03068	1.16997	0.291999	0.293391	0.761286	0.301722	0.880598	0.150572
1.26327	1.42441	1.03049	1.16943	0.291644	0.293025	0.76108	0.301019	0.881671	0.150117
1.26411	1.42473	1.03142	1.16975	0.292331	0.293094	0.759918	0.299686	0.881408	0.150356
1.26494	1.425	1.03044	1.17002	0.292804	0.29307	0.758	0.298638	0.882664	0.15072
1.26577	1.42323	1.03033	1.16825	0.290986	0.294454	0.759545	0.298099	0.885555	0.150486
1.2666	1.42206	1.03025	1.16708	0.290105	0.294936	0.756919	0.298407	0.887757	0.149405
1.26744	1.42246	1.03051	1.16748	0.289958	0.294883	0.756272	0.298768	0.887203	0.14939
1.26827	1.4221	1.03145	1.16712	0.290418	0.294393	0.755833	0.299987	0.889525	0.15111
1.2691	1.42181	1.03029	1.16683	0.289729	0.294948	0.754796	0.300644	0.886333	0.152511
1.26993	1.42112	1.03027	1.16614	0.289405	0.294597	0.754858	0.300511	0.886011	0.151724
1.27077	1.42055	1.02967	1.16557	0.289701	0.294866	0.75488	0.30006	0.885614	0.151288
1.2716	1.42038	1.02886	1.1654	0.289767	0.295845	0.752419	0.301008	0.886333	0.150965
1.27243	1.41987	1.02849	1.16489	0.290504	0.296262	0.752651	0.301512	0.885986	0.15207
1.27326	1.41898	1.02919	1.164	0.291753	0.297417	0.751137	0.301271	0.885107	0.152789
1.2741	1.41836	1.03044	1.16338	0.29219	0.297799	0.752455	0.303406	0.88321	0.1529
1.27493	1.41778	1.03059	1.1628	0.294179	0.298032	0.7504	0.303557	0.880568	0.151823
1.27576	1.4166	1.03068	1.16162	0.295591	0.29763	0.750933	0.303707	0.879857	0.151107
1.27659	1.41607	1.03156	1.16109	0.29487	0.296713	0.751421	0.304606	0.879138	0.151013
1.27743	1.41594	1.03167	1.16096	0.296251	0.295401	0.750261	0.305357	0.877954	0.150013
1.27826	1.41447	1.03182	1.15949	0.296441	0.293546	0.748314	0.306356	0.877729	0.149302
1.27909	1.41243	1.03309	1.15745	0.297536	0.294256	0.748939	0.305827	0.876216	0.148597
1.27992	1.41004	1.03293	1.15506	0.297443	0.294117	0.746884	0.306895	0.876546	0.14907
1.28076	1.40871	1.03337	1.15372	0.297153	0.294485	0.747386	0.307659	0.876196	0.14724
1.28159	1.40768	1.03282	1.1527	0.297635	0.295001	0.747005	0.309114	0.876335	0.147078
1.28242	1.40683	1.03246	1.15185	0.295863	0.2948	0.749199	0.310513	0.875573	0.145858
1.28325	1.40452	1.03273	1.14954	0.296378	0.295792	0.749418	0.31118	0.874472	0.144867
1.28409	1.4029	1.03445	1.14792	0.296584	0.29584	0.749175	0.312727	0.874261	0.144661
1.28492	1.40219	1.03371	1.14721	0.297273	0.295362	0.750313	0.315026	0.874558	0.14506
1.28575	1.40127	1.03381	1.14629	0.297187	0.295392	0.749958	0.315804	0.872787	0.144737
1.28658	1.40128	1.03432	1.1463	0.299964	0.294416	0.747773	0.317363	0.871264	0.146244
1.28742	1.40066	1.03576	1.14568	0.300769	0.294257	0.748038	0.317346	0.870762	0.147549
1.28825	1.40082	1.03645	1.14585	0.300622	0.294799	0.745886	0.317264	0.872305	0.14865
1.28908	1.40025	1.03527	1.14527	0.300718	0.295468	0.745108	0.316998	0.872009	0.147242
1.28991	1.39987	1.03566	1.14489	0.301227	0.296208	0.744203	0.31627	0.873174	0.145989
1.29075	1.39945	1.03623	1.14447	0.30273	0.296608	0.743177	0.316056	0.873634	0.146302
1.29158	1.3988	1.0373	1.14382	0.303243	0.296907	0.743387	0.316767	0.874132	0.146354
1.29241	1.39773	1.03809	1.14275	0.303159	0.296158	0.744294	0.316365	0.872587	0.146032
1.29324	1.39674	1.03839	1.14176	0.302983	0.295903	0.744093	0.316332	0.873209	0.146495
1.29408	1.39613	1.03831	1.14115	0.301711	0.296328	0.744707	0.315405	0.871272	0.14626
1.29491	1.39362	1.03619	1.13864	0.303458	0.296386	0.74292	0.312804	0.873309	0.145821
1.29574	1.39156	1.03598	1.13658	0.303958	0.29769	0.742586	0.312584	0.87542	0.146882
1.29657	1.38821	1.03597	1.13323	0.303537	0.298449	0.742847	0.312031	0.876078	0.147384
1.29741	1.38524	1.03546	1.13026	0.303323	0.299372	0.742206	0.311021	0.875787	0.147567
1.29824	1.38369	1.03534	1.12871	0.3029	0.300251	0.741947	0.309879	0.875373	0.147778
1.29907	1.38224	1.0367	1.12726	0.303008	0.29954	0.742492	0.309773	0.873614	0.148975
1.2999	1.38071	1.03764	1.12573	0.303474	0.299018	0.740754	0.309423	0.873108	0.149431
1.30074	1.37969	1.03897	1.12471	0.303449	0.299987	0.74144	0.30908	0.872606	0.150309
1.30157	1.37948	1.0376	1.1245	0.304433	0.299941	0.742705	0.308434	0.873701	0.153796
1.3024	1.37873	1.03785	1.12375	0.303802	0.299567	0.742783	0.307635	0.874021	0.154011
1.30323	1.37861	1.03866	1.12363	0.304351	0.299671	0.739464	0.307878	0.874389	0.155354
1.30407	1.37936	1.03785	1.12438	0.305715	0.298706	0.737909	0.307635	0.873829	0.156865
1.3049	1.37934	1.03654	1.12436	0.305165	0.299607	0.737509	0.306489	0.872606	0.156426
1.30573	1.37759	1.03613	1.12261	0.305543	0.299902	0.737431	0.305542	0.87123	0.156575
1.30656	1.37525	1.03661	1.12027	0.305783	0.298954	0.735296	0.30557	0.870673	0.157584
1.3074	1.37411	1.03795	1.11913	0.303746	0.299238	0.736451	0.303714	0.869608	0.156518
1.30823	1.37348	1.03824	1.1185	0.302852	0.297941	0.737013	0.304294	0.869318	0.155932
1.30906	1.37082	1.03826	1.11584	0.302961	0.2972	0.739331	0.305919	0.867196	0.155051
1.30989	1.36928	1.039	1.1143	0.303304	0.296002	0.739244	0.306026	0.864864	0.156786
1.31073	1.36788	1.03897	1.1129	0.301803	0.295297	0.737687	0.307181	0.865886	0.159006
1.31156	1.36702	1.03858	1.11204	0.300552	0.295656	0.738376	0.307689	0.862226	0.159158
1.31239	1.36622	1.03916	1.11124	0.300149	0.295731	0.737082	0.307446	0.861252	0.159135
1.31322	1.36448	1.03931	1.1095	0.300782	0.296323	0.735538	0.308036	0.860216	0.159576
1.31406	1.3638	1.03955	1.10882	0.299907	0.296479	0.736403	0.308864	0.856778	0.160073
1.31489	1.36256	1.04001	1.10758	0.300597	0.295995	0.734246	0.31061	0.856414	0.159723
1.31572	1.36174	1.04284	1.10676	0.30038	0.296423	0.734575	0.311883	0.854558	0.161192
1.31655	1.35966	1.04394	1.10468	0.299258	0.296304	0.734933	0.312082	0.851995	0.160906
1.31739	1.36076	1.04382	1.10578	0.300075	0.295798	0.736445	0.312484	0.851199	0.162357
1.31822	1.36237	1.04415	1.10739	0.300058	0.294733	0.733908	0.314005	0.849707	0.162057
1.31905	1.36173	1.04484	1.10675	0.300723	0.294502	0.733409	0.314932	0.84973	0.163463
1.31988	1.36206	1.04437	1.10708	0.299688	0.295514	0.734145	0.315522	0.850369	0.164085
1.32072	1.36183	1.04377	1.10685	0.297937	0.296277	0.735552	0.315992	0.85213	0.163953
1.32155	1.36078	1.04238	1.1058	0.296527	0.295702	0.73364	0.316513	0.853092	0.164676
1.32238	1.35835	1.04368	1.10337	0.29721	0.295053	0.730296	0.316274	0.852706	0.164619
1.32321	1.35654	1.04476	1.10156	0.297061	0.296895	0.72747	0.316647	0.85026	0.164355
1.32405	1.35463	1.04492	1.09965	0.296632	0.297674	0.729223	0.316683	0.850637	0.163929
1.32488	1.35305	1.04617	1.09807	0.295959	0.2978	0.728305	0.316726	0.850111	0.163181
1.32571	1.35183	1.04785	1.09685	0.29584	0.2969	0.727173	0.317697	0.851165	0.164292
1.32654	1.35103	1.04887	1.09605	0.295053	0.297925	0.725014	0.318857	0.850434	0.164374
1.32738	1.35066	1.05008	1.09568	0.293552	0.299465	0.725738	0.318819	0.852116	0.164033
1.32821	1.3497	1.0499	1.09472	0.294309	0.299155	0.72404	0.320117	0.852645	0.163341
1.32904	1.34793	1.0497	1.09295	0.294446	0.299951	0.722997	0.319154	0.851646	0.161671
1.32987	1.34717	1.04984	1.09219	0.294263	0.301192	0.721403	0.319053	0.851051	0.160753
1.33071	1.3456	1.04956	1.09062	0.293561	0.301565	0.720494	0.319754	0.851813	0.159529
1.33154	1.34306	1.04991	1.08808	0.293779	0.300656	0.721614	0.319321	0.851003	0.15843
1.33237	1.34049	1.04939	1.08551	0.294133	0.30116	0.719225	0.318546	0.853388	0.157501
1.3332	1.33747	1.0484	1.08249	0.293966	0.300016	0.718688	0.318107	0.854542	0.15729
1.33404	1.3388	1.04871	1.08382	0.293811	0.299249	0.717983	0.317377	0.854788	0.156296
1.33487	1.33857	1.04931	1.08359	0.294723	0.298092	0.716635	0.317182	0.856684	0.156164
1.3357	1.33608	1.04919	1.0811	0.293447	0.298231	0.719889	0.315682	0.858137	0.157014
1.33653	1.33598	1.04832	1.081	0.290727	0.297878	0.718987	0.316262	0.858734	0.155718
1.33737	1.33731	1.04824	1.08233	0.290107	0.298509	0.719089	0.316679	0.859394	0.155126
1.3382	1.33601	1.04933	1.08103	0.289012	0.29882	0.715286	0.315854	0.858709	0.153247
1.33903	1.33363	1.05027	1.07865	0.289439	0.299509	0.717737	0.315565	0.858757	0.151531
1.33986	1.33339	1.04985	1.07841	0.288884	0.300051	0.71931	0.314897	0.858483	0.151004
1.3407	1.33207	1.04984	1.07709	0.289025	0.301104	0.717622	0.314137	0.857432	0.149607
1.34153	1.32912	1.05075	1.07414	0.289481	0.30135	0.715252	0.31381	0.8569	0.148803
1.34236	1.32833	1.05153	1.07335	0.290055	0.301144	0.714686	0.313226	0.856511	0.146331
1.34319	1.32737	1.05151	1.07239	0.289134	0.301159	0.716323	0.312444	0.856731	0.145658
1.34403	1.32539	1.05137	1.07041	0.288997	0.299475	0.720118	0.311806	0.85643	0.144537
1.34486	1.32259	1.05131	1.06761	0.290631	0.298043	0.718988	0.310953	0.854712	0.143665
1.34569	1.32194	1.05046	1.06696	0.289575	0.298826	0.720797	0.310241	0.851953	0.142006
1.34652	1.32088	1.04876	1.0659	0.288575	0.298274	0.719701	0.309924	0.85015	0.140321
1.34736	1.3191	1.0484	1.06412	0.288703	0.296897	0.718977	0.309289	0.850921	0.139267
1.34819	1.31775	1.04838	1.06277	0.289737	0.29494	0.718913	0.309702	0.849659	0.139168
1.34902	1.31635	1.04867	1.06137	0.289861	0.295242	0.721339	0.310015	0.848006	0.139473
1.34985	1.31606	1.04995	1.06108	0.290179	0.295624	0.722066	0.311133	0.847072	0.139831
1.35069	1.31642	1.05089	1.06144	0.289518	0.295179	0.720947	0.311403	0.851007	0.139378
1.35152	1.31696	1.0525	1.06198	0.28993	0.293637	0.721235	0.310782	0.850611	0.138815
1.35235	1.31791	1.05248	1.06293	0.290763	0.29544	0.722418	0.310554	0.850917	0.138341
1.35318	1.31856	1.05401	1.06358	0.290668	0.294528	0.721954	0.31156	0.851411	0.138277
1.35402	1.31951	1.05521	1.06453	0.291742	0.296568	0.722724	0.312133	0.849054	0.139555
1.35485	1.31805	1.05429	1.06307	0.291963	0.29755	0.723975	0.312044	0.851042	0.138685
1.35568	1.31614	1.05357	1.06116	0.291776	0.298392	0.723086	0.311977	0.851732	0.137539
1.35651	1.31696	1.05385	1.06198	0.293876	0.299545	0.721007	0.313139	0.849923	0.137765
1.35735	1.31507	1.05365	1.06009	0.295581	0.299173	0.718389	0.311763	0.84929	0.138789
1.35818	1.31244	1.05324	1.05746	0.295985	0.297706	0.715879	0.310704	0.849218	0.139238
1.35901	1.31066	1.05341	1.05568	0.295577	0.297853	0.715103	0.310316	0.847211	0.140241
1.35984	1.30916	1.05226	1.05418	0.294433	0.297943	0.714704	0.310483	0.849018	0.141855
1.36068	1.30857	1.05349	1.05359	0.292501	0.297494	0.713424	0.310524	0.849818	0.14165
1.36151	1.30754	1.05478	1.05256	0.292573	0.297394	0.713473	0.310321	0.849521	0.141018
1.36234	1.30694	1.05422	1.05196	0.290624	0.297522	0.713434	0.310851	0.847406	0.141335
1.36317	1.30526	1.05438	1.05028	0.290122	0.297055	0.713756	0.311297	0.844878	0.141652
1.36401	1.30609	1.05451	1.05111	0.289823	0.295782	0.713841	0.312473	0.843305	0.141123
1.36484	1.30578	1.05554	1.0508	0.289483	0.295429	0.710447	0.312621	0.841129	0.141907
1.36567	1.30431	1.05671	1.04933	0.287891	0.296404	0.711956	0.313142	0.841392	0.142695
1.3665	1.30003	1.05742	1.04505	0.287646	0.296909	0.710916	0.314098	0.844859	0.144399
1.36734	1.29764	1.05823	1.04266	0.28856	0.297221	0.709987	0.314143	0.842764	0.145671
1.36817	1.29699	1.05944	1.04201	0.288804	0.297459	0.710295	0.313913	0.840478	0.145986
1.369	1.29685	1.05927	1.04187	0.288943	0.298446	0.708797	0.314395	0.839396	0.145876
1.36983	1.29723	1.05968	1.04225	0.289081	0.297739	0.706962	0.31455	0.841201	0.145967
1.37067	1.29646	1.05851	1.04148	0.289466	0.298268	0.704896	0.314365	0.840728	0.147009
1.3715	1.29418	1.05783	1.0392	0.289584	0.298025	0.705709	0.313422	0.837052	0.147607
1.37233	1.29354	1.05726	1.03856	0.289174	0.299933	0.706569	0.313221	0.835692	0.148699
1.37316	1.29068	1.05831	1.0357	0.288631	0.29955	0.70488	0.313294	0.835297	0.149784
1.374	1.28837	1.05913	1.03339	0.288448	0.300317	0.705548	0.313866	0.833853	0.149596
1.37483	1.28727	1.06076	1.03229	0.28857	0.298818	0.704356	0.314726	0.833218	0.148332
1.37566	1.28801	1.06221	1.03303	0.286685	0.297818	0.702715	0.314532	0.830968	0.148979
1.37649	1.28756	1.06307	1.03258	0.285266	0.297973	0.70209	0.314029	0.828248	0.149385
1.37733	1.28385	1.06401	1.02887	0.2833	0.296625	0.702208	0.312918	0.829158	0.148936
1.37816	1.28133	1.06527	1.02635	0.281818	0.296221	0.702553	0.313118	0.828632	0.148202
1.37899	1.28053	1.06643	1.02555	0.280763	0.296799	0.702308	0.313735	0.82895	0.148491
1.37982	1.28039	1.067	1.02541	0.280994	0.297103	0.704585	0.313332	0.830903	0.14728
1.38066	1.27942	1.06928	1.02444	0.280978	0.297814	0.704073	0.312903	0.830421	0.146875
1.38149	1.27688	1.06965	1.0219	0.283153	0.297604	0.70472	0.313272	0.827649	0.147557
1.38232	1.27595	1.06912	1.02097	0.284053	0.295941	0.704512	0.314296	0.827361	0.149107
1.38315	1.27611	1.06976	1.02113	0.285766	0.294439	0.703717	0.314354	0.828617	0.14921
1.38399	1.27605	1.07101	1.02107	0.286544	0.293958	0.703489	0.31488	0.830611	0.151106
1.38482	1.27459	1.07302	1.01961	0.286435	0.294688	0.703201	0.313635	0.831093	0.152261
1.38565	1.27442	1.07328	1.01944	0.286868	0.294876	0.70383	0.312902	0.831511	0.152999
1.38648	1.27477	1.07294	1.01979	0.287225	0.293748	0.703347	0.313031	0.8317	0.153601
1.38732	1.27646	1.07266	1.02148	0.287967	0.292239	0.703737	0.313306	0.829751	0.154304
1.38815	1.2769	1.07158	1.02192	0.287687	0.291569	0.70465	0.313302	0.830593	0.154485
1.38898	1.27556	1.07057	1.02058	0.286735	0.29136	0.704124	0.31263	0.830576	0.154545
1.38981	1.27415	1.0704	1.01917	0.28569	0.291338	0.705709	0.311441	0.831947	0.156145
1.39065	1.27293	1.07089	1.01795	0.285138	0.291628	0.704823	0.31083	0.829092	0.157517
1.39148	1.27116	1.07274	1.01618	0.284898	0.29014	0.704836	0.310654	0.829936	0.15761
1.39231	1.27137	1.07395	1.01639	0.284541	0.288855	0.703739	0.310143	0.830322	0.157718
1.39314	1.26918	1.0734	1.0142	0.284005	0.286682	0.702496	0.309695	0.831022	0.156883
1.39398	1.2705	1.07309	1.01552	0.282636	0.287127	0.704218	0.309692	0.83014	0.155044
1.39481	1.27122	1.0717	1.01624	0.28123	0.285739	0.705794	0.308797	0.829176	0.15515
1.39564	1.27044	1.07033	1.01546	0.279746	0.285383	0.708298	0.307927	0.829201	0.155619
1.39647	1.26722	1.07028	1.01224	0.281013	0.285151	0.708536	0.308315	0.829145	0.157703
1.39731	1.265	1.0713	1.01002	0.282361	0.285684	0.710484	0.308104	0.830814	0.158057
1.39814	1.26644	1.07196	1.01146	0.282403	0.285557	0.710572	0.30805	0.831272	0.156789
1.39897	1.26618	1.07265	1.0112	0.282647	0.285836	0.711064	0.30761	0.828813	0.155578
1.3998	1.26621	1.07322	1.01123	0.284583	0.286151	0.712434	0.307674	0.828036	0.156027
1.40064	1.26619	1.07272	1.01121	0.284023	0.285962	0.712314	0.308596	0.827036	0.155289
1.40147	1.26653	1.07122	1.01155	0.283977	0.284662	0.712517	0.309548	0.827575	0.156686
1.4023	1.2671	1.07197	1.01212	0.283313	0.285426	0.711203	0.309232	0.829211	0.157133
1.40313	1.26584	1.07316	1.01086	0.282533	0.286061	0.710497	0.308201	0.828103	0.155672
1.40397	1.26429	1.07424	1.00931	0.281587	0.286525	0.710393	0.307083	0.82646	0.15559
1.4048	1.26341	1.07377	1.00843	0.281097	0.28689	0.709114	0.3061	0.824453	0.154798
1.40563	1.26317	1.07243	1.00819	0.281358	0.287079	0.706629	0.30765	0.82368	0.15348
1.40646	1.26261	1.07302	1.00763	0.281369	0.286487	0.707785	0.308931	0.823314	0.153679
1.4073	1.263	1.0743	1.00802	0.280505	0.286755	0.704768	0.309019	0.821397	0.153741
1.40813	1.26276	1.07534	1.00778	0.280462	0.286803	0.70377	0.308933	0.821915	0.153243
1.40896	1.26077	1.07775	1.00579	0.280479	0.287635	0.703824	0.309759	0.822279	0.153206
1.40979	1.26072	1.07963	1.00574	0.280318	0.28857	0.704389	0.310053	0.823734	0.154311
1.41063	1.26075	1.08153	1.00577	0.281318	0.288136	0.702255	0.309907	0.823141	0.151916
1.41146	1.26004	1.08232	1.00506	0.281898	0.287818	0.702661	0.310056	0.823763	0.151305
1.41229	1.25916	1.08234	1.00418	0.281358	0.288407	0.703146	0.309111	0.821802	0.151092
1.41312	1.25948	1.08219	1.0045	0.281644	0.289345	0.704083	0.309663	0.822274	0.150165
1.41396	1.2575	1.08275	1.00252	0.281339	0.291203	0.70296	0.310242	0.821765	0.150432
1.41479	1.25476	1.08299	0.999778	0.282083	0.289914	0.7022	0.310274	0.819778	0.14977
1.41562	1.2542	1.08353	0.999224	0.283553	0.291006	0.701951	0.309603	0.822277	0.150839
1.41645	1.2537	1.08359	0.998721	0.2837	0.292697	0.701364	0.3095	0.822348	0.150777
1.41729	1.25336	1.08461	0.99838	0.282979	0.292521	0.702388	0.309428	0.821655	0.150377
1.41812	1.25411	1.08465	0.999133	0.282197	0.291321	0.700041	0.309948	0.820877	0.150022
1.41895	1.25398	1.08388	0.999003	0.283561	0.291829	0.698939	0.309663	0.818545	0.150105
1.41978	1.2542	1.08316	0.999223	0.284522	0.291797	0.698469	0.309654	0.820848	0.15099
1.42062	1.25352	1.08195	0.998539	0.282397	0.291183	0.698561	0.310414	0.82185	0.150288
1.42145	1.25151	1.08226	0.996531	0.281511	0.291048	0.697466	0.311308	0.822218	0.151456
1.42228	1.24873	1.08298	0.993755	0.281194	0.290353	0.695597	0.310626	0.82054	0.150987
1.42311	1.24817	1.08205	0.993188	0.281511	0.290075	0.694647	0.310461	0.820278	0.148756
1.42395	1.24814	1.08179	0.993164	0.281579	0.290466	0.694687	0.310959	0.821227	0.150442
1.42478	1.24922	1.08212	0.994242	0.283364	0.291423	0.696798	0.312161	0.821388	0.151848
1.42561	1.2488	1.08277	0.993821	0.282359	0.291362	0.698173	0.312641	0.821554	0.150564
1.42644	1.24754	1.08352	0.992561	0.281104	0.291288	0.697634	0.311795	0.822	0.15157
1.42728	1.24698	1.08285	0.992003	0.280793	0.291525	0.696133	0.310761	0.823064	0.150958
1.42811	1.24564	1.08307	0.990664	0.281629	0.292124	0.69718	0.310502	0.823236	0.150507
1.42894	1.24443	1.08369	0.989454	0.281886	0.291799	0.697852	0.310688	0.822331	0.150031
1.42977	1.24465	1.08339	0.989672	0.28078	0.291254	0.698136	0.309856	0.823512	0.149794
1.43061	1.24334	1.0827	0.988357	0.280667	0.290078	0.697506	0.310126	0.820871	0.149378
1.43144	1.24114	1.08234	0.98616	0.278756	0.289794	0.697803	0.311362	0.820721	0.150963
1.43227	1.24009	1.08235	0.985106	0.278327	0.291458	0.697872	0.311847	0.82031	0.150584
1.4331	1.23974	1.08198	0.984757	0.27741	0.29175	0.698687	0.313124	0.820852	0.151018
1.43394	1.23837	1.08257	0.983394	0.276435	0.291914	0.697548	0.314455	0.820864	0.152788
1.43477	1.23826	1.08394	0.983275	0.276197	0.291587	0.698304	0.314388	0.821501	0.151838
1.4356	1.23759	1.08525	0.982611	0.275113	0.291521	0.69959	0.314515	0.822054	0.152369
1.43643	1.23561	1.08637	0.980627	0.273486	0.291284	0.700085	0.315397	0.820668	0.151194
1.43727	1.23506	1.08682	0.980081	0.27283	0.290095	0.700393	0.315872	0.819105	0.152307
1.4381	1.23451	1.0863	0.979526	0.271754	0.290305	0.698183	0.316873	0.818096	0.15167
1.43893	1.23268	1.08516	0.977697	0.271756	0.291241	0.698732	0.31816	0.816128	0.151641
1.43976	1.23075	1.08487	0.975769	0.270498	0.291248	0.697708	0.319431	0.816608	0.151056
1.4406	1.22817	1.08441	0.973188	0.26954	0.2893	0.698791	0.319987	0.814121	0.150478
1.44143	1.22773	1.08582	0.972753	0.269998	0.288321	0.697368	0.318847	0.814093	0.150432
1.44226	1.22965	1.08722	0.974675	0.270463	0.287195	0.697352	0.318516	0.814016	0.150047
1.44309	1.23118	1.0874	0.976205	0.271304	0.287786	0.698823	0.318347	0.816354	0.150259
1.44393	1.23085	1.08755	0.975867	0.270702	0.286761	0.700961	0.31816	0.815449	0.150673
1.44476	1.23165	1.0873	0.976666	0.269456	0.286625	0.702345	0.318681	0.814241	0.150798
1.44559	1.23024	1.08629	0.975258	0.268941	0.284974	0.70165	0.318157	0.814177	0.1495
1.44642	1.22933	1.08608	0.974348	0.270724	0.286167	0.70161	0.317441	0.8137	0.150115
1.44726	1.22879	1.08602	0.973811	0.272363	0.286394	0.703421	0.317673	0.811401	0.149448
1.44809	1.22751	1.08765	0.97253	0.273103	0.286486	0.705254	0.318179	0.81227	0.149275
1.44892	1.22701	1.08749	0.972034	0.273378	0.286895	0.704061	0.318314	0.813682	0.149594
1.44975	1.22654	1.08765	0.971561	0.272975	0.288007	0.70265	0.318301	0.815221	0.149154
1.45059	1.22548	1.08889	0.970501	0.273484	0.287922	0.700869	0.318344	0.814732	0.149068
1.45142	1.22631	1.09029	0.971327	0.2741	0.288112	0.700459	0.317955	0.815624	0.149326
1.45225	1.22817	1.08978	0.973188	0.274558	0.287884	0.699923	0.317166	0.814286	0.14929
1.45308	1.22766	1.08929	0.972678	0.273654	0.285883	0.700664	0.317091	0.81547	0.150482
1.45392	1.22693	1.08814	0.971952	0.273893	0.284617	0.697751	0.31683	0.816258	0.149747
1.45475	1.22486	1.08753	0.969878	0.27402	0.283577	0.698665	0.315643	0.813536	0.149215
1.45558	1.22547	1.08718	0.970494	0.27353	0.281773	0.698679	0.315748	0.81296	0.14978
1.45641	1.22681	1.08701	0.971828	0.274654	0.281515	0.697201	0.316629	0.814977	0.150813
1.45725	1.22556	1.0867	0.970583	0.276437	0.280473	0.695331	0.317354	0.815249	0.15232
1.45808	1.22504	1.08719	0.970059	0.276265	0.280204	0.694141	0.317842	0.817844	0.153141
1.45891	1.22271	1.08774	0.96773	0.277101	0.279579	0.693738	0.317819	0.819089	0.153887
1.45974	1.2221	1.0884	0.967122	0.276302	0.279343	0.693131	0.31684	0.82054	0.154019
1.46058	1.22075	1.08895	0.965769	0.27597	0.279155	0.694958	0.315956	0.821166	0.154541
1.46141	1.2221	1.08984	0.96712	0.276885	0.281594	0.694525	0.3162	0.823044	0.155844
1.46224	1.22252	1.08945	0.967537	0.277564	0.282269	0.695659	0.317191	0.821191	0.156851
1.46307	1.22052	1.08912	0.965542	0.278802	0.28271	0.696209	0.316934	0.821951	0.155159
1.46391	1.2196	1.08931	0.964619	0.278989	0.282515	0.695848	0.317107	0.820158	0.155318
1.46474	1.21888	1.08911	0.963903	0.279327	0.28232	0.694902	0.317637	0.819586	0.156424
1.46557	1.21841	1.09023	0.963426	0.280475	0.282251	0.693888	0.316939	0.820197	0.154559
1.4664	1.21738	1.09154	0.962399	0.279147	0.283746	0.694013	0.316721	0.820046	0.155672
1.46724	1.21516	1.0924	0.960183	0.278371	0.282847	0.694153	0.317251	0.821103	0.155571
1.46807	1.21395	1.09287	0.958965	0.277696	0.282778	0.693753	0.317387	0.823914	0.156092
1.4689	1.21406	1.09204	0.95908	0.276971	0.281411	0.69331	0.317243	0.823816	0.156112
1.46973	1.21187	1.09203	0.956894	0.275859	0.281018	0.695435	0.317208	0.824321	0.155985
1.47057	1.21076	1.09167	0.95578	0.274549	0.280897	0.697298	0.317181	0.823399	0.155543
1.4714	1.21036	1.09124	0.955382	0.275083	0.281752	0.700416	0.317574	0.821888	0.156568
1.47223	1.20885	1.09104	0.953871	0.275079	0.28189	0.702804	0.318685	0.822242	0.157656
1.47306	1.20713	1.09233	0.952147	0.275212	0.282635	0.704654	0.318803	0.821635	0.157566
1.4739	1.20644	1.09345	0.951465	0.275848	0.282903	0.703987	0.318645	0.818747	0.157682
1.47473	1.20789	1.09477	0.952911	0.275787	0.284499	0.707104	0.318962	0.817006	0.15776
1.47556	1.20772	1.0953	0.952744	0.275396	0.28498	0.706592	0.319451	0.817572	0.157947
1.47639	1.2062	1.09618	0.951224	0.276271	0.286663	0.705839	0.320238	0.816104	0.158325
1.47723	1.20461	1.09652	0.949633	0.276229	0.288065	0.704938	0.320241	0.811987	0.157502
1.47806	1.20364	1.09715	0.948664	0.275277	0.289459	0.705387	0.319871	0.810567	0.1559
1.47889	1.20282	1.09786	0.947836	0.27485	0.289308	0.704998	0.319736	0.809186	0.154245
1.47972	1.20415	1.09893	0.949167	0.274947	0.288669	0.706543	0.319661	0.808589	0.153129
1.48056	1.20501	1.10009	0.95003	0.27535	0.288265	0.707603	0.320049	0.808967	0.153001
1.48139	1.20613	1.1005	0.951151	0.27551	0.287367	0.709657	0.320455	0.80717	0.153629
1.48222	1.20703	1.10088	0.952045	0.275457	0.28618	0.71048	0.320677	0.806047	0.153007
1.48305	1.20515	1.10145	0.950175	0.275529	0.285608	0.709289	0.321255	0.805798	0.153234
1.48389	1.20526	1.10145	0.95028	0.27468	0.286766	0.707683	0.320369	0.803541	0.15527
1.48472	1.20383	1.10144	0.948849	0.273435	0.287183	0.707961	0.319553	0.802548	0.155536
1.48555	1.20317	1.10254	0.948188	0.272573	0.288212	0.708598	0.320239	0.801296	0.155107
1.48638	1.20206	1.1025	0.947077	0.271617	0.288668	0.709621	0.321406	0.80097	0.155749
1.48722	1.20097	1.10263	0.945991	0.272277	0.288139	0.709805	0.322292	0.80174	0.154893
1.48805	1.20269	1.10317	0.947705	0.271411	0.288729	0.709935	0.323644	0.802899	0.154646
1.48888	1.20243	1.10319	0.947446	0.26967	0.288707	0.709594	0.324204	0.803345	0.154281
1.48971	1.20032	1.10336	0.945344	0.268308	0.290396	0.709258	0.324979	0.803742	0.153189
1.49055	1.20176	1.10457	0.946777	0.267822	0.289905	0.710006	0.325726	0.802369	0.15265
1.49138	1.20309	1.10539	0.94811	0.267869	0.289582	0.708636	0.325654	0.80233	0.151776
1.49221	1.20339	1.10593	0.94841	0.266942	0.290058	0.70616	0.325633	0.801194	0.150514
1.49304	1.20227	1.10638	0.947287	0.266301	0.290671	0.70453	0.325401	0.800702	0.148462
1.49388	1.20224	1.10683	0.947256	0.266114	0.291264	0.704723	0.325374	0.799502	0.147055
1.49471	1.20179	1.10581	0.946805	0.265264	0.291435	0.704039	0.325024	0.800727	0.145083
1.49554	1.20013	1.10513	0.945145	0.264968	0.290744	0.703025	0.324849	0.801557	0.145066
1.49637	1.19964	1.10552	0.944659	0.265756	0.29103	0.703293	0.324517	0.802013	0.143294
1.4972	1.19957	1.1055	0.944587	0.265556	0.291429	0.703367	0.323568	0.803826	0.144018
1.49804	1.19968	1.10557	0.9447	0.26562	0.289284	0.702213	0.323128	0.805564	0.143913
1.49887	1.20192	1.1063	0.94694	0.265512	0.287873	0.701212	0.323126	0.806187	0.144064
1.4997	1.20026	1.10646	0.945275	0.266986	0.288863	0.702031	0.322984	0.805705	0.143686
1.50053	1.19816	1.10614	0.943177	0.26739	0.290898	0.70176	0.3225	0.805449	0.142382
1.50137	1.19655	1.10666	0.941568	0.267514	0.291587	0.701389	0.322592	0.804622	0.141641
1.5022	1.19515	1.10705	0.940175	0.267402	0.291999	0.700711	0.322881	0.80751	0.142588
1.50303	1.19162	1.10788	0.936643	0.266431	0.292504	0.701939	0.322813	0.808503	0.142082
1.50387	1.18952	1.10902	0.934535	0.266101	0.293688	0.704667	0.322286	0.80823	0.140666
1.5047	1.18762	1.10952	0.932641	0.265638	0.292487	0.70631	0.323756	0.808862	0.140945
1.50553	1.18802	1.11016	0.933038	0.265895	0.291941	0.705812	0.325307	0.809447	0.139819
1.50636	1.18573	1.11027	0.930753	0.266204	0.292401	0.705478	0.324947	0.809933	0.138715
1.5072	1.18415	1.11094	0.929169	0.265557	0.292175	0.705537	0.323417	0.810558	0.137629
1.50803	1.18557	1.11082	0.930593	0.265268	0.292978	0.705322	0.321859	0.808913	0.137736
1.50886	1.18437	1.1104	0.929389	0.266124	0.292947	0.70488	0.320039	0.806641	0.139028
1.50969	1.18327	1.11107	0.928289	0.268037	0.292814	0.705934	0.319689	0.804099	0.139238
1.51052	1.18385	1.11091	0.928874	0.269361	0.293491	0.705882	0.318786	0.80279	0.139901
1.51136	1.18325	1.11076	0.928269	0.269607	0.292877	0.704601	0.318012	0.801125	0.140041
1.51219	1.18207	1.11117	0.927089	0.26991	0.292916	0.706603	0.317587	0.80023	0.140679
1.51302	1.18116	1.11111	0.926177	0.270646	0.291396	0.708702	0.315902	0.801579	0.140684
1.51385	1.18139	1.11122	0.926409	0.270412	0.290834	0.708553	0.314438	0.801744	0.141725
1.51469	1.17972	1.1105	0.924744	0.269977	0.289753	0.707222	0.3138	0.803273	0.143214
1.51552	1.17957	1.11087	0.924587	0.270009	0.290658	0.707604	0.314089	0.802372	0.142754
1.51635	1.17904	1.11179	0.924058	0.269828	0.290504	0.707049	0.313376	0.801592	0.142947
1.51719	1.17783	1.11222	0.922854	0.270126	0.290295	0.707981	0.312542	0.801687	0.144882
1.51802	1.17527	1.11257	0.920293	0.269691	0.290532	0.708771	0.313266	0.799912	0.144626
1.51885	1.17533	1.11354	0.920346	0.269424	0.291523	0.710393	0.313907	0.79978	0.143926
1.51968	1.17533	1.11416	0.920351	0.269609	0.292302	0.711508	0.313212	0.799063	0.143346
1.52052	1.17545	1.11516	0.920473	0.268632	0.291726	0.711252	0.312771	0.798421	0.142804
1.52135	1.17633	1.11506	0.921351	0.267511	0.290893	0.710539	0.313471	0.797618	0.143593
1.52218	1.17786	1.11501	0.922881	0.266374	0.290296	0.710978	0.312533	0.79709	0.14509
1.52301	1.176	1.11574	0.921018	0.266231	0.289895	0.711266	0.311822	0.794656	0.14417
1.52384	1.1772	1.11619	0.922218	0.265601	0.288999	0.711283	0.31165	0.79482	0.143296
1.52468	1.17643	1.1168	0.921452	0.26502	0.288651	0.710545	0.311397	0.797151	0.141584
1.52551	1.17793	1.1181	0.922946	0.265651	0.290019	0.71053	0.311004	0.797401	0.140537
1.52634	1.17793	1.11888	0.922948	0.265409	0.290159	0.710931	0.310595	0.7954	0.141537
1.52717	1.18	1.11954	0.925016	0.264899	0.290133	0.71022	0.310781	0.796213	0.142412
1.52801	1.17941	1.11856	0.924431	0.265489	0.289062	0.708433	0.311601	0.796319	0.143334
1.52884	1.1772	1.11817	0.922218	0.265527	0.287584	0.708579	0.312667	0.797011	0.143617
1.52967	1.17581	1.11871	0.920832	0.264541	0.287408	0.709143	0.312905	0.798136	0.142749
1.53051	1.17698	1.11907	0.922	0.263576	0.288309	0.708649	0.312376	0.799178	0.142879
1.53134	1.17633	1.12064	0.921345	0.261892	0.287699	0.707465	0.312257	0.798158	0.143828
1.53217	1.17665	1.12048	0.921672	0.261695	0.288777	0.705634	0.312398	0.798249	0.143363
1.533	1.17545	1.12059	0.92047	0.262212	0.289783	0.702961	0.313078	0.797426	0.143963
1.53384	1.17321	1.12166	0.918225	0.261647	0.290865	0.701641	0.314734	0.796493	0.144201
1.53467	1.17283	1.12152	0.91785	0.261556	0.289752	0.70184	0.315512	0.796531	0.1441
1.5355	1.1724	1.12209	0.917418	0.262519	0.28935	0.701767	0.316216	0.796691	0.143497
1.53633	1.17254	1.12257	0.91756	0.262996	0.288173	0.701643	0.316726	0.798052	0.143912
1.53716	1.16942	1.12285	0.914439	0.263545	0.289146	0.701453	0.317488	0.798954	0.142993
1.538	1.16959	1.12386	0.914613	0.262778	0.289401	0.701128	0.318523	0.8003	0.143305
1.53883	1.17146	1.12543	0.916478	0.262708	0.288266	0.700597	0.317618	0.800421	0.143688
1.53966	1.1696	1.12516	0.914617	0.262216	0.288329	0.700261	0.316772	0.800308	0.145568
1.54049	1.16663	1.1238	0.911651	0.261201	0.288397	0.699499	0.316772	0.801721	0.14581
1.54133	1.1682	1.12289	0.913224	0.261438	0.288401	0.698374	0.316682	0.803246	0.147198
1.54216	1.16713	1.12324	0.912149	0.261945	0.28836	0.69818	0.316167	0.804445	0.148413
1.54299	1.16308	1.12371	0.908099	0.262775	0.287915	0.697708	0.315834	0.805348	0.147858
1.54383	1.16453	1.12383	0.909546	0.262637	0.288567	0.696031	0.315817	0.80485	0.147284
1.54466	1.16403	1.12394	0.909053	0.263307	0.289557	0.694351	0.315684	0.802062	0.148712
1.54549	1.16547	1.12379	0.910486	0.263719	0.289721	0.693981	0.315737	0.8008	0.151234
1.54632	1.16418	1.12339	0.909204	0.261436	0.289755	0.693823	0.31569	0.800744	0.152109
1.54716	1.16112	1.12396	0.906144	0.260888	0.290627	0.694588	0.315948	0.801827	0.152069
1.54799	1.16043	1.12474	0.905447	0.261291	0.29017	0.696291	0.316077	0.800857	0.151706
1.54882	1.16053	1.12567	0.905551	0.262899	0.291519	0.697193	0.316299	0.79831	0.15163
1.54965	1.1599	1.12657	0.904923	0.263538	0.290914	0.696985	0.317298	0.798271	0.151235
1.55048	1.16051	1.12821	0.905529	0.263692	0.290791	0.69789	0.31768	0.798124	0.151221
1.55132	1.1591	1.12955	0.904117	0.26369	0.289605	0.698332	0.318174	0.796743	0.151075
1.55215	1.15842	1.13001	0.903439	0.26469	0.289742	0.698734	0.319207	0.796407	0.149923
1.55298	1.1565	1.13079	0.901516	0.265884	0.289966	0.700549	0.319701	0.798444	0.150282
1.55381	1.15678	1.13197	0.901798	0.265428	0.287794	0.700526	0.319976	0.797755	0.150641
1.55465	1.15872	1.13197	0.903737	0.264796	0.287266	0.700127	0.320087	0.798801	0.149628
1.55548	1.15981	1.13225	0.904827	0.264688	0.287546	0.699949	0.319998	0.799037	0.148497
1.55631	1.16124	1.13267	0.906259	0.263843	0.287636	0.700027	0.318912	0.798474	0.148962
1.55715	1.16053	1.13351	0.905551	0.263345	0.287128	0.699604	0.318548	0.797726	0.14991
1.55798	1.16247	1.13372	0.907492	0.262874	0.287062	0.701396	0.319183	0.79723	0.150583
1.55881	1.16342	1.13271	0.908438	0.263328	0.286617	0.70135	0.319671	0.796216	0.148754
1.55964	1.1641	1.13139	0.909121	0.263311	0.286528	0.701288	0.320512	0.795897	0.14737
1.56048	1.16343	1.13136	0.908449	0.263894	0.28658	0.701431	0.320244	0.796213	0.14629
1.56131	1.16453	1.1326	0.909546	0.26502	0.286486	0.700974	0.319943	0.794323	0.146709
1.56214	1.16224	1.13355	0.90726	0.265121	0.2862	0.700706	0.320371	0.792058	0.146157
1.56297	1.16336	1.13417	0.908382	0.264449	0.286111	0.701753	0.321439	0.792816	0.145016
1.5638	1.16667	1.13501	0.911689	0.263261	0.286288	0.701774	0.323253	0.793899	0.143646
1.56464	1.16598	1.13603	0.911004	0.263475	0.286034	0.702707	0.324438	0.794332	0.14283
1.56547	1.16435	1.13671	0.909374	0.264034	0.2855	0.703074	0.324636	0.796475	0.142926
1.5663	1.16415	1.13739	0.909174	0.263837	0.284776	0.702238	0.324208	0.796451	0.142122
1.56713	1.16311	1.13855	0.908129	0.26477	0.283555	0.701709	0.3243	0.796301	0.139763
1.56797	1.16547	1.13895	0.910488	0.265411	0.282544	0.700806	0.324396	0.798376	0.138808
1.5688	1.16442	1.13922	0.909438	0.264396	0.281854	0.699153	0.323943	0.798781	0.139692
1.56963	1.16441	1.13962	0.909435	0.263753	0.282377	0.698386	0.323584	0.798839	0.139498
1.57046	1.16427	1.13954	0.909294	0.263358	0.284218	0.698159	0.323156	0.798533	0.139384
1.5713	1.16324	1.13863	0.90826	0.263881	0.285064	0.697677	0.324216	0.797549	0.13801
1.57213	1.16136	1.1382	0.906381	0.264306	0.284702	0.697514	0.324658	0.798165	0.137589
1.57296	1.16095	1.13843	0.905973	0.264323	0.284901	0.697427	0.32438	0.799003	0.137721
1.5738	1.16271	1.13942	0.907731	0.264388	0.284141	0.697723	0.324088	0.797072	0.139604
1.57463	1.16161	1.13927	0.90663	0.265392	0.285226	0.700255	0.323148	0.799015	0.139397
1.57546	1.16132	1.13903	0.90634	0.26695	0.286063	0.701816	0.323126	0.799021	0.138989
1.57629	1.15944	1.14047	0.904459	0.26703	0.28705	0.704184	0.323766	0.798579	0.139628
1.57713	1.1581	1.14121	0.903119	0.266097	0.288502	0.705227	0.325384	0.798459	0.13969
1.57796	1.15804	1.14039	0.903061	0.266233	0.289564	0.706032	0.325924	0.798256	0.140013
1.57879	1.15798	1.1404	0.902996	0.266301	0.289555	0.707054	0.325437	0.797541	0.140688
1.57962	1.15557	1.1414	0.900588	0.266525	0.289185	0.707581	0.325657	0.796136	0.141755
1.58045	1.15272	1.14239	0.897739	0.267608	0.289648	0.707901	0.326235	0.796587	0.141551
1.58129	1.15209	1.1441	0.897112	0.266978	0.289183	0.706958	0.327159	0.796492	0.141052
1.58212	1.15046	1.14488	0.89548	0.266196	0.289906	0.706783	0.328343	0.798	0.141159
1.58295	1.14799	1.14531	0.893014	0.266597	0.290143	0.70734	0.328246	0.798196	0.141986
1.58378	1.14697	1.14511	0.891986	0.267825	0.289978	0.706908	0.326717	0.797383	0.142524
1.58462	1.14546	1.14432	0.890484	0.269439	0.289653	0.707348	0.324814	0.79601	0.143776
1.58545	1.14553	1.14416	0.890546	0.269147	0.289089	0.706758	0.324189	0.794898	0.143606
1.58628	1.14748	1.14446	0.892495	0.267749	0.28978	0.704197	0.325081	0.793859	0.143937
1.58712	1.14691	1.14321	0.891925	0.267122	0.290735	0.703736	0.326485	0.792872	0.144262
1.58795	1.14534	1.14252	0.890362	0.267513	0.290704	0.703801	0.328083	0.792047	0.147064
1.58878	1.14378	1.14158	0.888804	0.267608	0.290603	0.703614	0.328139	0.789463	0.147172
1.58961	1.14349	1.14039	0.888513	0.268195	0.291347	0.703828	0.328078	0.787906	0.147007
1.59045	1.14333	1.14041	0.888347	0.267631	0.290404	0.705111	0.327781	0.788693	0.146652
1.59128	1.14188	1.14123	0.886904	0.268001	0.289754	0.706201	0.328187	0.789261	0.147284
1.59211	1.14181	1.14193	0.88683	0.267997	0.288381	0.705876	0.328979	0.788939	0.149209
1.59294	1.14289	1.1422	0.887911	0.26752	0.289221	0.704519	0.328789	0.788661	0.148821
1.59377	1.14102	1.14157	0.886041	0.268144	0.288392	0.704875	0.328776	0.787576	0.148362
1.59461	1.14008	1.14001	0.885102	0.267188	0.288252	0.705498	0.328492	0.787439	0.146246
1.59544	1.13817	1.13939	0.883185	0.266486	0.287445	0.704518	0.32805	0.786462	0.147923
1.59627	1.13607	1.14074	0.881095	0.265659	0.287003	0.704029	0.327102	0.786135	0.148919
1.5971	1.13434	1.14104	0.879355	0.266851	0.286343	0.704148	0.326674	0.787587	0.149349
1.59794	1.13186	1.14122	0.876884	0.268752	0.285316	0.703143	0.326393	0.788825	0.149532
1.59877	1.12987	1.14278	0.874892	0.269332	0.284633	0.701762	0.325638	0.789089	0.148809
1.5996	1.12648	1.14397	0.871496	0.269271	0.285238	0.69868	0.324156	0.789089	0.148258
1.60044	1.12576	1.14478	0.870779	0.269313	0.285933	0.697276	0.322738	0.789477	0.148018
1.60127	1.12734	1.14513	0.872359	0.268888	0.286201	0.696728	0.322062	0.787812	0.148041
1.6021	1.12718	1.14467	0.872195	0.268977	0.287037	0.697297	0.320958	0.786388	0.149322
1.60293	1.12722	1.14444	0.872243	0.26876	0.285806	0.698689	0.320623	0.785591	0.14987
1.60377	1.12814	1.14388	0.873161	0.267905	0.284701	0.698909	0.321406	0.786215	0.148872
1.6046	1.12726	1.14479	0.872284	0.267139	0.285215	0.699194	0.32234	0.785011	0.148792
1.60543	1.125	1.14658	0.870018	0.266711	0.285197	0.69845	0.323453	0.785608	0.149677
1.60626	1.12267	1.14711	0.867689	0.267837	0.286734	0.699252	0.323636	0.786999	0.1511
1.60709	1.11983	1.14719	0.864853	0.2693	0.286731	0.702103	0.322556	0.785282	0.149984
1.60793	1.11989	1.14867	0.864907	0.269939	0.285759	0.703861	0.321326	0.78463	0.149635
1.60876	1.11841	1.14897	0.863427	0.269843	0.28598	0.704695	0.320043	0.785675	0.149357
1.60959	1.11915	1.14976	0.864166	0.269763	0.287748	0.704455	0.320332	0.786571	0.149817
1.61042	1.11826	1.15124	0.863284	0.269901	0.288222	0.703564	0.320718	0.787418	0.149373
1.61126	1.116	1.15212	0.86102	0.269126	0.286937	0.702173	0.32121	0.786921	0.149579
1.61209	1.11796	1.15298	0.862976	0.267507	0.287066	0.700248	0.320554	0.78517	0.148774
1.61292	1.11673	1.15316	0.861751	0.266961	0.287663	0.699384	0.319136	0.784575	0.14778
1.61376	1.11599	1.15394	0.861007	0.267595	0.28743	0.700956	0.318832	0.783995	0.14861
1.61459	1.11653	1.15484	0.861553	0.267581	0.288837	0.700864	0.319533	0.784991	0.149576
1.61542	1.11501	1.15509	0.860028	0.267375	0.289406	0.699512	0.3202	0.785019	0.149728
1.61625	1.11798	1.15544	0.863004	0.267009	0.291767	0.699612	0.320106	0.785379	0.147864
1.61709	1.1189	1.15559	0.863924	0.267089	0.291745	0.698095	0.320855	0.784481	0.147839
1.61792	1.11992	1.15637	0.864936	0.266444	0.290793	0.695034	0.321946	0.781394	0.147229
1.61875	1.11949	1.15799	0.864515	0.265012	0.290697	0.694879	0.322747	0.778521	0.146403
1.61958	1.11678	1.15977	0.861796	0.264001	0.291218	0.695526	0.323234	0.776865	0.14629
1.62041	1.11839	1.16197	0.863413	0.264953	0.289876	0.695765	0.32452	0.777605	0.146469
1.62125	1.11938	1.16284	0.864397	0.264413	0.288756	0.69545	0.32539	0.778873	0.147989
1.62208	1.11942	1.16287	0.864437	0.26352	0.288107	0.695804	0.32589	0.780407	0.14927
1.62291	1.1193	1.16278	0.864322	0.263261	0.287002	0.696558	0.327374	0.780689	0.149557
1.62374	1.11706	1.16231	0.862076	0.263408	0.286073	0.695135	0.327165	0.780098	0.148449
1.62458	1.11577	1.16254	0.860787	0.263358	0.286099	0.696034	0.326653	0.777416	0.149107
1.62541	1.11412	1.1628	0.859137	0.264316	0.285609	0.696405	0.327008	0.775555	0.1492
1.62624	1.1144	1.16336	0.859421	0.264301	0.285419	0.696977	0.327003	0.77437	0.147444
1.62708	1.11429	1.16489	0.859313	0.262216	0.28462	0.696213	0.326783	0.774199	0.146242
1.62791	1.11242	1.16561	0.857438	0.260413	0.284474	0.694761	0.32738	0.776347	0.146714
1.62874	1.11	1.16458	0.855016	0.260642	0.2848	0.694062	0.328499	0.776583	0.14675
1.62957	1.11146	1.16446	0.856484	0.260724	0.284243	0.69439	0.328063	0.776087	0.145527
1.63041	1.11073	1.16498	0.85575	0.260366	0.282722	0.694678	0.326666	0.775277	0.144757
1.63124	1.11025	1.16519	0.855267	0.259826	0.281539	0.693745	0.325902	0.77559	0.144483
1.63207	1.11158	1.16534	0.856604	0.258994	0.282393	0.693452	0.325128	0.774922	0.144737
1.6329	1.10909	1.16508	0.854109	0.259616	0.280902	0.694013	0.324412	0.774517	0.145816
1.63373	1.1091	1.1655	0.854124	0.260232	0.280065	0.69455	0.324197	0.775015	0.146377
1.63457	1.10852	1.16564	0.853539	0.259687	0.280589	0.694143	0.323853	0.775686	0.146823
1.6354	1.10816	1.16658	0.853179	0.259313	0.279201	0.694259	0.322367	0.776696	0.145896
1.63623	1.10733	1.16865	0.852354	0.259746	0.278825	0.695562	0.320123	0.777959	0.146649
1.63706	1.10527	1.16994	0.85029	0.259608	0.276574	0.696307	0.320182	0.777625	0.146882
1.6379	1.10476	1.17054	0.849781	0.25868	0.276031	0.697989	0.320075	0.777826	0.146684
1.63873	1.10405	1.17055	0.849069	0.258287	0.277334	0.699474	0.31917	0.778532	0.147224
1.63956	1.10539	1.16962	0.850409	0.259715	0.278292	0.700035	0.318765	0.77862	0.148028
1.6404	1.10906	1.16845	0.854078	0.260528	0.278723	0.700885	0.31917	0.777832	0.148282
1.64123	1.10887	1.16685	0.85389	0.260266	0.278483	0.701643	0.319055	0.777584	0.148126
1.64206	1.10734	1.16657	0.852362	0.26048	0.280292	0.701795	0.318696	0.77729	0.146932
1.64289	1.10408	1.16748	0.849104	0.259639	0.280277	0.701326	0.317887	0.777069	0.145757
1.64373	1.10427	1.16842	0.849294	0.259748	0.280221	0.701345	0.31678	0.778153	0.144688
1.64456	1.10587	1.16921	0.850885	0.260545	0.281723	0.702408	0.316954	0.778402	0.145047
1.64539	1.10707	1.17039	0.852088	0.261111	0.282714	0.702998	0.316629	0.780487	0.14494
1.64622	1.10667	1.17054	0.851686	0.261174	0.283111	0.703208	0.315644	0.782939	0.144544
1.64705	1.10719	1.16949	0.852212	0.262235	0.282864	0.703985	0.315277	0.782776	0.1453
1.64789	1.10773	1.1691	0.85275	0.263852	0.281944	0.70499	0.315197	0.781644	0.146638
1.64872	1.11036	1.16993	0.855379	0.265229	0.280794	0.705873	0.315552	0.781399	0.146594
1.64955	1.11031	1.17213	0.855332	0.26543	0.280661	0.705341	0.315392	0.780434	0.147465
1.65038	1.10932	1.17402	0.854339	0.264461	0.281919	0.705286	0.315654	0.779595	0.147158
1.65122	1.10987	1.17508	0.854895	0.263677	0.281861	0.705328	0.316957	0.779394	0.147522
1.65205	1.10869	1.17692	0.853713	0.263532	0.282247	0.705859	0.318104	0.779531	0.147408
1.65288	1.10559	1.17792	0.850607	0.265374	0.281711	0.706501	0.318263	0.781821	0.148733
1.65372	1.10507	1.17856	0.850093	0.26558	0.28283	0.707207	0.318817	0.783028	0.148445
1.65455	1.105	1.17938	0.850018	0.264768	0.283279	0.70691	0.318873	0.783227	0.148419
1.65538	1.10505	1.17921	0.850067	0.264785	0.282616	0.704781	0.319686	0.782992	0.147669
1.65621	1.10402	1.17932	0.849042	0.264369	0.283257	0.70267	0.321373	0.781251	0.147965
1.65705	1.10349	1.17886	0.848505	0.263942	0.28257	0.700198	0.323037	0.779853	0.147093
1.65788	1.10295	1.17841	0.847975	0.264785	0.283339	0.697538	0.323991	0.779473	0.147302
1.65871	1.10209	1.17814	0.847114	0.265552	0.282936	0.696419	0.324874	0.778645	0.147685
1.65954	1.10033	1.17833	0.845354	0.265834	0.282189	0.696111	0.325015	0.778438	0.146788
1.66037	1.09995	1.17919	0.844968	0.265414	0.281249	0.696211	0.323974	0.780627	0.146005
1.66121	1.09781	1.17978	0.842832	0.26422	0.28087	0.696417	0.32338	0.782924	0.145958
1.66204	1.09538	1.1805	0.840399	0.263686	0.281708	0.697784	0.324042	0.782557	0.146388
1.66287	1.09516	1.18075	0.840178	0.264077	0.281231	0.699521	0.325168	0.781109	0.146956
[truncated: 33,163 more rows]
