# Supplementary material for: A conserved cell division protein directly regulates FtsZ dynamics in filamentous and unicellular actinobacteria
Source: eLife. 2021 Mar 17;10:e63387. doi: 10.7554/eLife.63387 (PMC7968930; doi:10.7554/eLife.63387)
Supplement: Figure 7—figure supplement 3—source data 1. [file elife-63387-fig7-figsupp3-data1.xlsx]

## Sheet: Calculations
Standard curve calculation
			Retention (ml)
	kDa	log MW	Run1	Run2	Average
	670	2.82607	8.28	8.57	8.425
	158	2.19866	11.15	10.5	10.825
	44	1.64345	12.68	13.2	12.94
	17	1.23045	14.44	14.93	14.685
	1.35	0.130334	19.01	19.53	19.27
Molecular weight calculation
		SepHMs-His6 FL
			Retention (mL) SepH Peak	Calculated Log MW	MW	Number of Subunits (SepH = 38.2 kDa)	Mean MW	Mean Number of Subunits
		Run 1	11.43	2.05172	112.646	3.61046	121.496	3.89411
		Run 2	11.23	2.10134	126.281	4.04746
		Run 3	11.24	2.09886	125.561	4.0244

## Sheet: Raw data
V (ml)	SepHMs-His6 1	SepHMs-His6 2	SepHMs-His6 3
0.0012	-0.243683	0.418748	-0.01385		Data used for Figure S7C are highlighted in yellow
0.002033	-0.285412	0.33724	0.006028
0.002866	-0.286123	0.336363	0.005925
0.003699	-0.286748	0.336835	0.005733
0.004532	-0.286945	0.336932	0.005289
0.005365	-0.287254	0.337037	0.004806
0.006197	-0.287491	0.337304	0.004328
0.00703	-0.287613	0.337218	0.004047
0.007863	-0.287653	0.336597	0.004081
0.008696	-0.287516	0.336	0.004068
0.009529	-0.287379	0.335523	0.003807
0.010362	-0.287111	0.335046	0.003545
0.011195	-0.286832	0.33463	0.003386
0.012027	-0.28674	0.334254	0.003299
0.01286	-0.287392	0.333877	0.003211
0.013693	-0.288044	0.334038	0.002659
0.014526	-0.287758	0.334667	0.00202
0.015359	-0.286587	0.33555	0.002087
0.016192	-0.286774	0.334344	0.003012
0.017025	-0.287132	0.334923	0.003078
0.017858	-0.288716	0.285344	0.002854
0.01869	-0.290434	0.084226	0.003785
0.019523	-0.289949	0.083884	0.003609
0.020356	-0.290423	0.082543	0.002547
0.021189	-0.291653	0.083076	0.002506
0.022022	-0.292107	0.08287	0.003486
0.022855	-0.29183	0.083484	0.004683
0.023688	-0.292158	0.08346	0.006403
0.02452	-0.291335	0.083079	0.008922
0.025353	-0.289237	0.08178	0.010834
0.026186	-0.289039	0.083364	0.011116
0.027019	-0.288694	0.084213	0.012969
0.027852	-0.287196	0.084674	0.014874
0.028685	-0.286644	0.085191	0.015513
0.029518	-0.283825	0.087005	0.016172
0.03035	-0.28317	0.088293	0.018749
0.031183	-0.281838	0.08984	0.02074
0.032016	-0.281143	0.091268	0.022216
0.032849	-0.281617	0.093212	0.023644
0.033682	-0.279794	0.095354	0.023959
0.034515	-0.279565	0.097295	0.025153
0.035348	-0.27975	0.097755	0.026784
0.036181	-0.279501	0.098731	0.026999
0.037013	-0.278714	0.101385	0.027324
0.037846	-0.277805	0.101923	0.028356
0.038679	-0.276839	0.102678	0.029484
0.039512	-0.275747	0.103918	0.029323
0.040345	-0.27597	0.103848	0.029866
0.041178	-0.276306	0.104207	0.031373
0.042011	-0.275863	0.10512	0.031584
0.042843	-0.276287	0.105832	0.032862
0.043676	-0.276121	0.107667	0.033981
0.044509	-0.275447	0.109759	0.03423
0.045342	-0.274663	0.111562	0.032413
0.046175	-0.275491	0.113675	0.030616
0.047008	-0.27628	0.115524	0.031638
0.047841	-0.275855	0.115875	0.030061
0.048673	-0.275775	0.116282	0.029723
0.049506	-0.275842	0.117281	0.029807
0.050339	-0.274958	0.118482	0.0296
0.051172	-0.26886	0.121536	0.028915
0.052005	-0.257656	0.126128	0.028591
0.052838	-0.243029	0.133034	0.028299
0.053671	-0.225928	0.141414	0.027134
0.054504	-0.209025	0.149704	0.027006
0.055336	-0.191252	0.159949	0.027605
0.056169	-0.175427	0.171703	0.027853
0.057002	-0.162684	0.181844	0.029713
0.057835	-0.151288	0.190715	0.030363
0.058668	-0.140483	0.199306	0.032013
0.059501	-0.130973	0.206796	0.033203
0.060334	-0.122494	0.213103	0.03675
0.061166	-0.115428	0.218216	0.040193
0.061999	-0.10824	0.222652	0.044133
0.062832	-0.101014	0.227731	0.048486
0.063665	-0.093795	0.233523	0.052405
0.064498	-0.087318	0.237496	0.056762
0.065331	-0.07926	0.240533	0.060994
0.066164	-0.069707	0.244723	0.067733
0.066996	-0.059392	0.248894	0.074389
0.067829	-0.050285	0.252111	0.081659
0.068662	-0.043269	0.25533	0.089222
0.069495	-0.037203	0.258434	0.096032
0.070328	-0.031222	0.260674	0.104581
0.071161	-0.026838	0.263167	0.112081
0.071994	-0.027807	0.263394	0.118747
0.072827	-0.033802	0.262296	0.126244
0.073659	-0.043028	0.259035	0.135549
0.074492	-0.054055	0.252838	0.145593
0.075325	-0.065807	0.247539	0.155393
0.076158	-0.078067	0.238949	0.162574
0.076991	-0.088368	0.228992	0.170771
0.077824	-0.095708	0.220766	0.179303
0.078657	-0.102178	0.214266	0.187388
0.079489	-0.10729	0.207864	0.19541
0.080322	-0.110966	0.200781	0.203262
0.081155	-0.113509	0.196738	0.209932
0.081988	-0.114763	0.193764	0.216704
0.082821	-0.116953	0.192035	0.222422
0.083654	-0.119364	0.189764	0.227954
0.084487	-0.120132	0.186199	0.233956
0.085319	-0.12089	0.183169	0.238808
0.086152	-0.123286	0.180608	0.245806
0.086985	-0.127826	0.176049	0.251385
0.087818	-0.133042	0.173396	0.256516
0.088651	-0.136183	0.170996	0.260399
0.089484	-0.138114	0.16968	0.263741
0.090317	-0.139983	0.169159	0.268027
0.09115	-0.140329	0.168006	0.271101
0.091982	-0.140497	0.165972	0.274807
0.092815	-0.139904	0.163887	0.279636
0.093648	-0.138674	0.162993	0.283438
0.094481	-0.137737	0.160474	0.285766
0.095314	-0.136826	0.159631	0.287928
0.096147	-0.136611	0.157855	0.291284
0.09698	-0.135696	0.156578	0.295357
0.097812	-0.134337	0.155848	0.298609
0.098645	-0.134361	0.15583	0.301346
0.099478	-0.133246	0.154107	0.305966
0.100311	-0.13021	0.152841	0.308809
0.101144	-0.126332	0.154008	0.31101
0.101977	-0.121667	0.152739	0.312341
0.10281	-0.117123	0.151975	0.314496
0.103642	-0.111571	0.151229	0.317985
0.104475	-0.105708	0.150754	0.321999
0.105308	-0.100795	0.150377	0.324142
0.106141	-0.095211	0.150091	0.326777
0.106974	-0.090146	0.150401	0.328432
0.107807	-0.087541	0.152133	0.330889
0.10864	-0.086705	0.15088	0.332798
0.109473	-0.086146	0.150244	0.334207
0.110305	-0.084977	0.149048	0.336534
0.111138	-0.08357	0.147806	0.337988
0.111971	-0.08217	0.147124	0.339267
0.112804	-0.080725	0.147571	0.341095
0.113637	-0.0794	0.148269	0.342759
0.11447	-0.078215	0.147207	0.344785
0.115303	-0.077295	0.147699	0.345977
0.116135	-0.076086	0.147643	0.346864
0.116968	-0.074165	0.14936	0.347134
0.117801	-0.072808	0.151225	0.348136
0.118634	-0.071418	0.150972	0.349818
0.119467	-0.069082	0.150659	0.350851
0.1203	-0.067831	0.151059	0.352034
0.121133	-0.069644	0.152004	0.354172
0.121965	-0.071987	0.15194	0.35703
0.122798	-0.074338	0.152103	0.359406
0.123631	-0.076747	0.152395	0.361142
0.124464	-0.079016	0.152753	0.362341
0.125297	-0.082539	0.152483	0.36343
0.12613	-0.086908	0.15434	0.365207
0.126963	-0.091547	0.15557	0.366438
0.127796	-0.094069	0.154518	0.368045
0.128628	-0.095192	0.153743	0.367833
0.129461	-0.093534	0.15401	0.369575
0.130294	-0.091872	0.154858	0.371583
0.131127	-0.090993	0.155804	0.373575
0.13196	-0.089832	0.157089	0.375072
0.132793	-0.089247	0.157616	0.377274
0.133626	-0.089009	0.157451	0.379073
0.134458	-0.088817	0.156455	0.380607
0.135291	-0.089113	0.156356	0.380603
0.136124	-0.088523	0.156584	0.382401
0.136957	-0.088119	0.15771	0.38438
0.13779	-0.089222	0.15762	0.386003
0.138623	-0.090043	0.157276	0.388574
0.139456	-0.090369	0.158857	0.391104
0.140288	-0.090035	0.157888	0.393581
0.141121	-0.089088	0.158428	0.394791
0.141954	-0.088636	0.159002	0.395015
0.142787	-0.089102	0.160108	0.396246
0.14362	-0.089188	0.160437	0.397246
0.144453	-0.08921	0.160853	0.398343
0.145286	-0.08884	0.161379	0.399644
0.146119	-0.087855	0.162924	0.401127
0.146951	-0.08646	0.161031	0.402725
0.147784	-0.084347	0.159956	0.404646
0.148617	-0.083627	0.160228	0.406807
0.14945	-0.082331	0.160867	0.409037
0.150283	-0.082068	0.162087	0.410576
0.151116	-0.082598	0.162781	0.412345
0.151949	-0.08296	0.162344	0.413645
0.152781	-0.082575	0.162076	0.415799
0.153614	-0.082175	0.164393	0.417007
0.154447	-0.081114	0.164853	0.418136
0.15528	-0.079815	0.165174	0.418944
0.156113	-0.07744	0.165358	0.421422
0.156946	-0.075558	0.165003	0.422715
0.157779	-0.07421	0.16416	0.424363
0.158611	-0.072796	0.164328	0.426802
0.159444	-0.071184	0.164798	0.42716
0.160277	-0.070233	0.163436	0.427167
0.16111	-0.069802	0.164694	0.425716
0.161943	-0.069774	0.164568	0.425929
0.162776	-0.068556	0.163988	0.426882
0.163609	-0.067106	0.16402	0.426703
0.164442	-0.06693	0.164123	0.428337
0.165274	-0.067095	0.164686	0.430021
0.166107	-0.066708	0.164895	0.431047
0.16694	-0.064006	0.163773	0.431542
0.167773	-0.061836	0.164997	0.430162
0.168606	-0.060275	0.165283	0.431886
0.169439	-0.058086	0.165737	0.432065
0.170272	-0.056464	0.165631	0.433552
0.171104	-0.053904	0.166143	0.434668
0.171937	-0.051331	0.166171	0.435322
0.17277	-0.049093	0.16769	0.436572
0.173603	-0.048014	0.168788	0.43743
0.174436	-0.046378	0.167152	0.439475
0.175269	-0.045585	0.168708	0.440999
0.176102	-0.045451	0.171104	0.442024
0.176934	-0.045377	0.172683	0.443
0.177767	-0.044638	0.17489	0.443872
0.1786	-0.043878	0.176632	0.443892
0.179433	-0.043052	0.176164	0.443528
0.180266	-0.04266	0.175489	0.447021
0.181099	-0.041626	0.176725	0.449949
0.181932	-0.040465	0.177368	0.453506
0.182765	-0.039406	0.178283	0.454153
0.183597	-0.038017	0.179481	0.455435
0.18443	-0.037198	0.179499	0.456901
0.185263	-0.035442	0.181239	0.458899
0.186096	-0.033311	0.181368	0.459368
0.186929	-0.032129	0.181695	0.460535
0.187762	-0.032092	0.182193	0.461628
0.188595	-0.031568	0.182583	0.464285
0.189427	-0.030946	0.183397	0.463923
0.19026	-0.031347	0.18453	0.465088
0.191093	-0.031285	0.183389	0.465417
0.191926	-0.029928	0.183081	0.46701
0.192759	-0.02767	0.183813	0.46806
0.193592	-0.024856	0.184287	0.46955
0.194425	-0.021904	0.183567	0.471145
0.195257	-0.020544	0.182282	0.471881
0.19609	-0.019217	0.1809	0.473678
0.196923	-0.017383	0.179328	0.474034
0.197756	-0.016037	0.178089	0.47463
0.198589	-0.015505	0.176126	0.475444
0.199422	-0.014465	0.174711	0.478318
0.200255	-0.012378	0.174227	0.480227
0.201088	-0.010088	0.17585	0.480403
0.20192	-0.009182	0.176439	0.47963
0.202753	-0.009379	0.176875	0.479337
0.203586	-0.009193	0.177131	0.481897
0.204419	-0.009295	0.177463	0.482524
0.205252	-0.008372	0.178309	0.484647
0.206085	-0.008544	0.178189	0.486035
0.206918	-0.009457	0.179347	0.4873
0.20775	-0.008949	0.178356	0.486838
0.208583	-0.008806	0.177432	0.486122
0.209416	-0.008615	0.176638	0.486104
0.210249	-0.008442	0.177332	0.488435
0.211082	-0.008482	0.176674	0.488772
0.211915	-0.008098	0.178346	0.489846
0.212748	-0.008835	0.178251	0.490167
0.21358	-0.011438	0.177807	0.491635
0.214413	-0.015033	0.176681	0.491849
0.215246	-0.017286	0.175538	0.491924
0.216079	-0.018504	0.175778	0.491721
0.216912	-0.015427	0.174967	0.491778
0.217745	-0.005286	0.174706	0.493611
0.218578	0.00417	0.174205	0.493361
0.219411	0.009402	0.175109	0.493846
0.220243	0.009688	0.176162	0.492888
0.221076	0.008585	0.177675	0.493872
0.221909	0.008568	0.17716	0.494547
0.222742	0.00965	0.177321	0.495208
0.223575	0.011733	0.176192	0.496236
0.224408	0.013209	0.176418	0.495172
0.225241	0.01438	0.176209	0.495667
0.226073	0.015162	0.175228	0.495375
0.226906	0.016709	0.175616	0.494289
0.227739	0.01809	0.173808	0.496582
0.228572	0.018479	0.173761	0.500078
0.229405	0.019364	0.175426	0.504288
0.230238	0.021645	0.176313	0.508194
0.231071	0.023689	0.17537	0.511069
0.231903	0.024867	0.175364	0.517314
0.232736	0.025965	0.17597	0.525346
0.233569	0.026418	0.185121	0.535199
0.234402	0.028946	0.196838	0.546437
0.235235	0.032153	0.204411	0.55844
0.236068	0.034974	0.207978	0.573627
0.236901	0.03828	0.210353	0.589546
0.237734	0.037597	0.212432	0.604328
0.238566	0.03032	0.214027	0.621124
0.239399	0.024029	0.215876	0.641068
0.240232	0.022887	0.217295	0.661456
0.241065	0.026659	0.219533	0.683331
0.241898	0.031015	0.22035	0.706268
0.242731	0.035437	0.222495	0.730349
0.243564	0.040455	0.224992	0.756683
0.244396	0.045495	0.228385	0.784304
0.245229	0.050231	0.230655	0.813859
0.246062	0.05496	0.234561	0.842503
0.246895	0.060033	0.23946	0.871166
0.247728	0.064357	0.244216	0.900345
0.248561	0.068814	0.250142	0.930854
0.249394	0.072895	0.256492	0.959021
0.250226	0.076818	0.260913	0.986931
0.251059	0.07944	0.265347	1.01337
0.251892	0.08263	0.270697	1.03951
0.252725	0.087425	0.277234	1.06485
0.253558	0.09207	0.28284	1.08669
0.254391	0.097054	0.28028	1.10759
0.255224	0.102273	0.27422	1.12644
0.256057	0.10802	0.272674	1.14633
0.256889	0.113459	0.276673	1.16342
0.257722	0.11734	0.28113	1.18041
0.258555	0.12142	0.285201	1.19733
0.259388	0.124875	0.291335	1.21199
0.260221	0.128355	0.296025	1.22592
0.261054	0.132009	0.302274	1.23745
0.261887	0.134669	0.305285	1.24637
0.262719	0.137071	0.309636	1.25361
0.263552	0.138848	0.312423	1.2577
0.264385	0.140468	0.315924	1.26161
0.265218	0.141836	0.318561	1.26412
0.266051	0.144106	0.321644	1.26507
0.266884	0.146913	0.32398	1.26747
0.267717	0.148795	0.326359	1.26818
0.268549	0.15036	0.328449	1.26988
0.269382	0.152667	0.330867	1.26598
0.270215	0.155322	0.33244	1.26574
0.271048	0.157501	0.334172	1.26452
0.271881	0.159794	0.336559	1.26368
0.272714	0.160642	0.337362	1.26256
0.273547	0.162928	0.336654	1.26061
0.27438	0.165613	0.337271	1.26068
0.275212	0.167743	0.337986	1.2585
0.276045	0.168344	0.338013	1.25864
0.276878	0.167534	0.33844	1.25806
0.277711	0.167505	0.336928	1.25633
0.278544	0.168457	0.338447	1.25545
0.279377	0.169653	0.33896	1.25432
0.28021	0.170807	0.338066	1.25338
0.281042	0.170657	0.339383	1.25099
0.281875	0.170605	0.337985	1.25124
0.282708	0.17052	0.338642	1.25303
0.283541	0.17107	0.339692	1.25474
0.284374	0.171906	0.34042	1.25625
0.285207	0.172232	0.339991	1.25953
0.28604	0.172423	0.340787	1.26106
0.286872	0.171916	0.341718	1.26462
0.287705	0.172202	0.342383	1.26583
0.288538	0.173154	0.343313	1.2684
0.289371	0.17422	0.343024	1.27002
0.290204	0.174249	0.342594	1.27347
0.291037	0.174401	0.342726	1.27662
0.29187	0.174334	0.343357	1.2783
0.292703	0.174129	0.344896	1.28073
0.293535	0.17495	0.346208	1.28395
0.294368	0.175129	0.347989	1.28547
0.295201	0.174565	0.349777	1.28505
0.296034	0.174371	0.350715	1.28549
0.296867	0.174254	0.352129	1.28475
0.2977	0.174731	0.353517	1.28227
0.298533	0.175015	0.35625	1.28088
0.299365	0.174799	0.356571	1.27749
0.300198	0.174029	0.357855	1.27528
0.301031	0.174763	0.360521	1.27355
0.301864	0.176517	0.361725	1.27249
0.302697	0.176354	0.362581	1.26959
0.30353	0.176903	0.36392	1.26658
0.304363	0.177822	0.364781	1.26239
0.305195	0.177757	0.367378	1.25834
0.306028	0.178115	0.368739	1.25144
0.306861	0.177497	0.370222	1.24745
0.307694	0.177076	0.371472	1.24134
0.308527	0.175247	0.372033	1.23508
0.30936	0.174548	0.370827	1.22792
0.310193	0.17421	0.370784	1.22202
0.311026	0.174768	0.371316	1.21484
0.311858	0.173789	0.370558	1.20742
0.312691	0.174144	0.369537	1.20098
0.313524	0.173763	0.367237	1.19438
0.314357	0.173382	0.365924	1.18627
0.31519	0.173175	0.364569	1.17931
0.316023	0.172108	0.361831	1.17314
0.316856	0.170632	0.360903	1.16617
0.317688	0.16929	0.360283	1.15943
0.318521	0.170145	0.359284	1.15276
0.319354	0.169565	0.357526	1.14572
0.320187	0.168079	0.35674	1.14106
0.32102	0.16686	0.356689	1.13495
0.321853	0.165922	0.352074	1.12824
0.322686	0.162978	0.350139	1.12034
0.323518	0.161282	0.349636	1.11451
0.324351	0.160451	0.348595	1.10677
0.325184	0.159524	0.346393	1.0998
0.326017	0.157901	0.343358	1.09412
0.32685	0.156221	0.341195	1.09132
0.327683	0.156317	0.33877	1.08635
0.328516	0.156866	0.335992	1.08029
0.329349	0.156804	0.333539	1.07295
0.330181	0.1559	0.331731	1.0682
0.331014	0.155471	0.331058	1.06247
0.331847	0.15495	0.330418	1.05679
0.33268	0.15462	0.329236	1.05068
0.333513	0.153783	0.3266	1.0447
0.334346	0.153027	0.326193	1.03929
0.335179	0.151925	0.324706	1.03338
0.336011	0.15016	0.324124	1.02727
0.336844	0.149021	0.325004	1.02188
0.337677	0.148418	0.324437	1.01809
0.33851	0.147305	0.322573	1.0122
0.339343	0.145458	0.322827	1.00641
0.340176	0.143775	0.324044	1.0013
0.341009	0.14352	0.322322	0.993983
0.341841	0.142716	0.319017	0.989675
0.342674	0.140909	0.318256	0.984937
0.343507	0.139923	0.317774	0.980739
0.34434	0.138775	0.315841	0.973956
0.345173	0.136346	0.313562	0.969398
0.346006	0.134071	0.312767	0.963911
0.346839	0.133239	0.311468	0.959343
0.347672	0.131227	0.31127	0.953281
0.348504	0.127889	0.310474	0.9476
0.349337	0.123738	0.310139	0.942777
0.35017	0.122687	0.308906	0.940672
0.351003	0.122156	0.308678	0.93707
0.351836	0.121012	0.306242	0.933589
0.352669	0.119404	0.303853	0.930533
0.353502	0.118796	0.301625	0.926763
0.354334	0.116475	0.303169	0.922643
0.355167	0.114599	0.301126	0.919058
0.356	0.11291	0.300138	0.916765
0.356833	0.111672	0.298561	0.91328
0.357666	0.111231	0.298322	0.909017
0.358499	0.109709	0.295657	0.905896
0.359332	0.108772	0.293857	0.902973
0.360164	0.106367	0.2902	0.899741
0.360997	0.104856	0.285774	0.896708
0.36183	0.102003	0.283441	0.894063
0.362663	0.102002	0.282667	0.889323
0.363496	0.101085	0.282586	0.885233
0.364329	0.101189	0.279803	0.88282
0.365162	0.100153	0.277875	0.888275
0.365995	0.098301	0.275833	0.974136
0.366827	0.097837	0.274945	1.06782
0.36766	0.095982	0.274921	1.13447
0.368493	0.09534	0.273523	1.15109
0.369326	0.096199	0.271343	1.15191
0.370159	0.097606	0.269109	1.149
0.370992	0.09558	0.267602	1.14463
0.371825	0.0923	0.266157	1.1402
0.372657	0.090948	0.264618	1.13577
0.37349	0.089108	0.263054	1.1306
0.374323	0.088003	0.261868	1.12599
0.375156	0.089562	0.260289	1.12227
0.375989	0.090174	0.259593	1.1199
0.376822	0.090728	0.258577	1.11676
0.377655	0.090243	0.25703	1.11304
0.378487	0.088887	0.254134	1.11069
0.37932	0.088052	0.253433	1.10688
0.380153	0.088133	0.251903	1.10361
0.380986	0.088926	0.251604	1.10077
0.381819	0.088545	0.250687	1.09574
0.382652	0.087515	0.252919	1.09353
0.383485	0.086243	0.25301	1.09126
0.384318	0.085672	0.251914	1.08832
0.38515	0.084162	0.252518	1.08419
0.385983	0.084216	0.253299	1.07259
0.386816	0.084538	0.254111	0.978539
0.387649	0.08398	0.252298	0.879958
0.388482	0.084546	0.250069	0.807034
0.389315	0.086365	0.248585	0.784039
0.390148	0.087641	0.24781	0.776157
0.39098	0.089383	0.246091	0.773976
0.391813	0.090018	0.245846	0.772603
0.392646	0.089748	0.246173	0.771984
0.393479	0.088423	0.245819	0.770386
0.394312	0.088058	0.24473	0.768478
0.395145	0.086876	0.244829	0.765438
0.395978	0.084772	0.24449	0.76364
0.39681	0.083003	0.242991	0.759543
0.397643	0.081629	0.242622	0.756538
0.398476	0.081635	0.243237	0.754894
0.399309	0.081677	0.24291	0.751847
0.400142	0.081664	0.243111	0.747986
0.400975	0.081243	0.243771	0.745154
0.401808	0.080594	0.244021	0.743622
0.402641	0.079821	0.243936	0.742633
0.403473	0.080313	0.24071	0.739502
0.404306	0.079014	0.2408	0.736267
0.405139	0.07833	0.241211	0.734371
0.405972	0.078388	0.239356	0.729951
0.406805	0.07689	0.237714	0.72779
0.407638	0.076201	0.23633	0.726954
0.408471	0.075888	0.235183	0.725216
0.409303	0.075577	0.23637	0.723434
0.410136	0.073545	0.23682	0.72226
0.410969	0.070786	0.237928	0.719668
0.411802	0.067125	0.240172	0.716349
0.412635	0.065443	0.239341	0.713083
0.413468	0.064694	0.237558	0.708816
0.414301	0.065616	0.23686	0.706622
0.415133	0.066269	0.235909	0.705485
0.415966	0.06514	0.235976	0.70423
0.416799	0.062596	0.234543	0.703148
0.417632	0.06212	0.235313	0.701088
0.418465	0.061982	0.234643	0.698311
0.419298	0.060478	0.233745	0.695053
0.420131	0.059284	0.233986	0.693451
0.420963	0.058916	0.232718	0.692331
0.421796	0.05787	0.231365	0.691501
0.422629	0.056573	0.23093	0.689452
0.423462	0.056336	0.230629	0.688192
0.424295	0.055675	0.231301	0.687355
0.425128	0.055495	0.230676	0.687568
0.425961	0.054161	0.229638	0.686308
0.426794	0.053671	0.230057	0.686289
0.427626	0.054036	0.22928	0.684336
0.428459	0.054148	0.228388	0.681318
0.429292	0.053448	0.227772	0.677787
0.430125	0.052565	0.225554	0.675537
0.430958	0.053056	0.224656	0.67242
0.431791	0.052031	0.223186	0.672791
0.432624	0.05192	0.2212	0.67055
0.433456	0.052599	0.220271	0.670013
0.434289	0.053163	0.221136	0.668691
0.435122	0.051221	0.220277	0.665447
0.435955	0.048977	0.219977	0.663822
0.436788	0.048317	0.219255	0.662905
0.437621	0.049828	0.218862	0.662025
0.438454	0.050664	0.216924	0.661459
0.439287	0.050126	0.215737	0.660895
0.440119	0.049891	0.215644	0.660508
0.440952	0.049506	0.214416	0.65834
0.441785	0.04898	0.213534	0.656788
0.442618	0.048082	0.213684	0.654793
0.443451	0.047326	0.212304	0.654346
0.444284	0.047753	0.212635	0.652761
0.445117	0.048749	0.210458	0.649766
0.445949	0.048788	0.209996	0.646094
0.446782	0.049105	0.209566	0.645032
0.447615	0.048505	0.209253	0.643355
0.448448	0.047674	0.210446	0.642972
0.449281	0.047234	0.210295	0.64214
0.450114	0.046298	0.211066	0.641314
0.450947	0.045499	0.211706	0.639463
0.451779	0.044279	0.211136	0.638807
0.452612	0.044602	0.211168	0.636399
0.453445	0.043622	0.210554	0.63601
0.454278	0.043761	0.211486	0.632998
0.455111	0.043967	0.209385	0.632483
0.455944	0.04429	0.209535	0.632074
0.456777	0.044406	0.211153	0.629337
0.45761	0.045362	0.21023	0.627217
0.458442	0.043347	0.209489	0.623948
0.459275	0.040962	0.208505	0.622038
0.460108	0.040646	0.208981	0.620498
0.460941	0.040029	0.208362	0.619488
0.461774	0.039231	0.208233	0.61877
0.462607	0.038507	0.209081	0.617443
0.46344	0.037131	0.209646	0.616529
0.464272	0.037252	0.209274	0.614858
0.465105	0.037492	0.207737	0.615302
0.465938	0.037134	0.207456	0.614487
0.466771	0.038108	0.205905	0.61372
0.467604	0.03885	0.205808	0.611661
0.468437	0.039963	0.204962	0.611903
0.46927	0.040618	0.202777	0.610205
0.470102	0.041895	0.202136	0.610531
0.470935	0.04505	0.201206	0.608444
0.471768	0.045839	0.199444	0.608531
0.472601	0.048909	0.19807	0.608067
0.473434	0.048889	0.196674	0.606645
0.474267	0.04965	0.19729	0.605635
0.4751	0.048907	0.195921	0.60462
0.475933	0.047169	0.196851	0.602763
0.476765	0.04627	0.197994	0.601378
0.477598	0.047409	0.19568	0.600443
0.478431	0.047305	0.195818	0.599201
0.479264	0.0484	0.196425	0.598263
0.480097	0.049995	0.196805	0.596884
0.48093	0.048502	0.196252	0.596056
0.481763	0.047706	0.196659	0.594528
0.482595	0.047865	0.195315	0.593119
0.483428	0.048989	0.193943	0.593796
0.484261	0.05142	0.193109	0.593669
0.485094	0.052342	0.192391	0.593863
0.485927	0.051374	0.192638	0.592725
0.48676	0.049954	0.1939	0.592761
0.487593	0.048098	0.195143	0.593672
0.488425	0.046724	0.195182	0.593549
0.489258	0.045066	0.195146	0.591063
0.490091	0.042929	0.195603	0.591252
0.490924	0.040299	0.19697	0.589905
0.491757	0.036232	0.1978	0.591597
0.49259	0.034542	0.199191	0.591339
0.493423	0.030449	0.200243	0.591039
0.494256	0.029215	0.201509	0.591423
0.495088	0.029791	0.200509	0.590281
0.495921	0.028726	0.201309	0.590296
0.496754	0.029061	0.201182	0.589065
0.497587	0.02778	0.198838	0.589648
0.49842	0.026873	0.198133	0.589263
0.499253	0.025316	0.197194	0.589359
0.500086	0.025736	0.196356	0.589239
0.500918	0.025275	0.197496	0.589023
0.501751	0.026492	0.198285	0.588066
0.502584	0.027371	0.196386	0.586571
0.503417	0.027068	0.196943	0.58538
0.50425	0.026541	0.196642	0.583103
0.505083	0.025365	0.194085	0.580097
0.505916	0.0243	0.194663	0.576789
0.506748	0.023921	0.194286	0.572989
0.507581	0.024101	0.192887	0.570683
0.508414	0.025179	0.192271	0.568141
0.509247	0.025139	0.192403	0.566978
0.51008	0.02437	0.191396	0.564555
0.510913	0.025361	0.190823	0.562573
0.511746	0.025763	0.189153	0.560686
0.512579	0.024847	0.188461	0.557261
0.513411	0.02524	0.188081	0.55409
0.514244	0.025275	0.188101	0.551779
0.515077	0.024694	0.187068	0.548749
0.51591	0.023314	0.186372	0.548151
0.516743	0.02226	0.185954	0.546562
0.517576	0.02313	0.185161	0.546405
0.518409	0.024376	0.184941	0.543025
0.519241	0.022357	0.186963	0.541137
0.520074	0.021428	0.188461	0.540341
0.520907	0.019223	0.18928	0.538789
0.52174	0.017689	0.188719	0.537487
0.522573	0.017022	0.189162	0.536362
0.523406	0.015294	0.190926	0.535962
0.524239	0.015604	0.192258	0.536354
0.525072	0.013415	0.193866	0.535786
0.525904	0.011671	0.195184	0.535695
0.526737	0.010446	0.194733	0.536036
0.52757	0.009306	0.193941	0.53622
0.528403	0.008475	0.194028	0.535818
0.529236	0.00698	0.195675	0.535662
0.530069	0.007154	0.196092	0.534
0.530902	0.008354	0.196349	0.533905
0.531734	0.007739	0.197888	0.532612
0.532567	0.009283	0.198928	0.53203
0.5334	0.010707	0.199478	0.531651
0.534233	0.01013	0.200146	0.531446
0.535066	0.011567	0.200861	0.531404
0.535899	0.014123	0.20215	0.532427
0.536732	0.014924	0.202888	0.53097
0.537564	0.016692	0.202577	0.529385
0.538397	0.015368	0.202331	0.52839
0.53923	0.014484	0.203263	0.528387
0.540063	0.014559	0.203753	0.528679
0.540896	0.015989	0.203299	0.526841
0.541729	0.016711	0.202886	0.526021
0.542562	0.01632	0.202685	0.525381
0.543395	0.016723	0.20073	0.525605
0.544227	0.01794	0.199849	0.526124
0.54506	0.016096	0.198166	0.524925
0.545893	0.016726	0.1967	0.525399
0.546726	0.017811	0.198095	0.525918
0.547559	0.01915	0.198035	0.526092
0.548392	0.020857	0.199283	0.527171
0.549225	0.020764	0.200125	0.527911
0.550057	0.020408	0.199125	0.528081
0.55089	0.019936	0.199366	0.528316
0.551723	0.018003	0.200631	0.528588
0.552556	0.017712	0.201045	0.528277
0.553389	0.015992	0.202905	0.527999
0.554222	0.015591	0.2046	0.529793
0.555055	0.015461	0.204955	0.530689
0.555887	0.01221	0.204215	0.530664
0.55672	0.0085	0.203258	0.530185
0.557553	0.008105	0.203092	0.52961
0.558386	0.007097	0.202338	0.529524
0.559219	0.006648	0.204015	0.52821
0.560052	0.007774	0.204493	0.528
0.560885	0.009521	0.20392	0.528959
0.561718	0.009481	0.203558	0.52888
0.56255	0.00922	0.204386	0.528979
0.563383	0.010181	0.205319	0.528505
0.564216	0.008414	0.205986	0.526905
0.565049	0.007782	0.206729	0.525211
0.565882	0.007492	0.207373	0.525167
0.566715	0.005477	0.207378	0.523937
0.567548	0.004722	0.206362	0.522116
0.56838	0.002785	0.208117	0.520788
0.569213	0.001316	0.207999	0.519303
0.570046	0.001166	0.207242	0.516816
0.570879	0.00073	0.206117	0.515322
0.571712	-0.000729	0.204833	0.515697
0.572545	-0.000564	0.203579	0.515618
0.573378	0.001209	0.201966	0.515978
0.57421	0.002174	0.198612	0.514034
0.575043	0.002771	0.197231	0.511842
0.575876	0.002161	0.196943	0.509017
0.576709	0.002241	0.197637	0.507173
0.577542	0.003694	0.197887	0.50561
0.578375	0.003011	0.198065	0.506283
0.579208	0.003207	0.199986	0.50607
0.580041	0.003706	0.200849	0.505094
0.580873	0.00198	0.201224	0.503747
0.581706	0.001666	0.202056	0.500279
0.582539	0.000731	0.203054	0.500257
0.583372	0.000892	0.202069	0.500505
0.584205	0.000125	0.201337	0.500125
0.585038	0.001131	0.201195	0.500337
0.585871	0.000827	0.200402	0.500632
0.586703	0.001984	0.199739	0.498237
0.587536	0.005294	0.20012	0.496954
0.588369	0.005739	0.200674	0.496043
0.589202	0.006047	0.199149	0.494978
0.590035	0.00561	0.198975	0.493618
0.590868	0.004263	0.19978	0.493339
0.591701	0.00435	0.200267	0.492348
0.592533	0.004272	0.199292	0.490731
0.593366	0.003674	0.199085	0.489669
0.594199	0.001586	0.199512	0.487927
0.595032	-0.000692	0.200821	0.488495
0.595865	-0.001358	0.200302	0.48785
0.596698	-0.000183	0.1995	0.48702
0.597531	0.000623	0.199637	0.486343
0.598363	0.00155	0.199466	0.48534
0.599196	0.000556	0.198639	0.482791
0.600029	-0.00111	0.19746	0.482449
0.600862	-0.001629	0.195244	0.483321
0.601695	-0.002054	0.193442	0.485272
0.602528	-0.003588	0.190975	0.487132
0.603361	-0.004257	0.189091	0.486499
0.604194	-0.004753	0.189351	0.485109
0.605026	-0.003819	0.188939	0.483811
0.605859	-0.003238	0.18885	0.482038
0.606692	-0.004369	0.188581	0.480096
0.607525	-0.004575	0.188314	0.481817
0.608358	-0.006049	0.188016	0.481754
0.609191	-0.006713	0.187399	0.481929
0.610024	-0.005633	0.187968	0.481178
0.610856	-0.005609	0.187707	0.480546
0.611689	-0.003077	0.18638	0.48032
0.612522	-0.00338	0.185935	0.479168
0.613355	-0.002719	0.186164	0.47889
0.614188	-0.001844	0.185735	0.477827
0.615021	-0.002262	0.184784	0.478139
0.615854	-0.000677	0.183834	0.476884
0.616686	-0.00095	0.183441	0.475722
0.617519	-0.001338	0.182661	0.475885
0.618352	-0.001768	0.180794	0.474162
0.619185	-0.003687	0.180247	0.472976
0.620018	-0.002001	0.179953	0.472687
0.620851	-0.000826	0.179271	0.471911
0.621684	-0.001413	0.179964	0.471629
0.622517	0.000107	0.181201	0.469212
0.623349	0.003248	0.182744	0.46752
0.624182	0.004442	0.183003	0.466475
0.625015	0.0043	0.182529	0.465255
0.625848	0.003468	0.182879	0.465334
0.626681	0.002177	0.183033	0.465588
0.627514	0.002059	0.181816	0.465725
0.628347	0.002541	0.180767	0.464597
0.629179	0.001694	0.180702	0.46285
0.630012	0.00164	0.180971	0.462046
0.630845	0.000754	0.180841	0.461647
0.631678	0.000901	0.181372	0.462647
0.632511	-0.001269	0.181156	0.462339
0.633344	-0.001114	0.181653	0.462427
0.634177	-0.001816	0.182619	0.461758
0.635009	-0.001307	0.182687	0.461929
0.635842	-0.000625	0.18175	0.46144
0.636675	-0.002517	0.181685	0.46125
0.637508	-0.002106	0.181746	0.461407
0.638341	-0.002373	0.181266	0.461888
0.639174	-0.003312	0.180726	0.463511
0.640007	-0.004141	0.180713	0.465004
0.64084	-0.005637	0.180708	0.465467
0.641672	-0.006536	0.181113	0.465809
0.642505	-0.005203	0.180123	0.465232
0.643338	-0.006509	0.179562	0.465092
0.644171	-0.008965	0.178692	0.464399
0.645004	-0.009923	0.178332	0.464186
0.645837	-0.010439	0.17829	0.465307
0.64667	-0.010937	0.177974	0.466033
0.647502	-0.011777	0.177721	0.466864
0.648335	-0.010263	0.178694	0.466208
0.649168	-0.010827	0.180081	0.464954
0.650001	-0.009699	0.180169	0.466061
0.650834	-0.008881	0.179303	0.466326
0.651667	-0.01045	0.177962	0.466187
0.6525	-0.010808	0.177337	0.465138
0.653332	-0.010455	0.178107	0.465129
0.654165	-0.010634	0.17749	0.465915
0.654998	-0.011261	0.177122	0.465989
0.655831	-0.011193	0.176973	0.465774
0.656664	-0.010713	0.177109	0.466533
0.657497	-0.008868	0.176315	0.467423
0.65833	-0.00901	0.176037	0.467172
0.659163	-0.00932	0.176233	0.466367
0.659995	-0.007869	0.175422	0.465295
0.660828	-0.007896	0.174623	0.466025
0.661661	-0.007955	0.175107	0.467535
0.662494	-0.0063	0.175605	0.466621
0.663327	-0.008066	0.176394	0.466275
0.66416	-0.007292	0.176034	0.465304
0.664993	-0.006672	0.176542	0.464659
0.665825	-0.006866	0.177503	0.464611
0.666658	-0.007335	0.177514	0.46433
0.667491	-0.007537	0.176546	0.463586
0.668324	-0.007278	0.175642	0.461903
0.669157	-0.009008	0.175779	0.461998
0.66999	-0.008854	0.175928	0.462692
0.670823	-0.009378	0.175215	0.461608
0.671655	-0.009754	0.175719	0.460239
0.672488	-0.007461	0.176051	0.460749
0.673321	-0.006159	0.175652	0.461392
0.674154	-0.007758	0.175075	0.461191
0.674987	-0.007778	0.175121	0.460266
0.67582	-0.005928	0.174573	0.46004
0.676653	-0.007281	0.175176	0.45973
0.677486	-0.007816	0.175837	0.457913
0.678318	-0.009926	0.176996	0.455976
0.679151	-0.011063	0.176488	0.455864
0.679984	-0.010538	0.177062	0.455305
0.680817	-0.0113	0.178919	0.455059
0.68165	-0.010571	0.18012	0.453374
0.682483	-0.009731	0.179286	0.451446
0.683316	-0.010688	0.178393	0.451708
0.684148	-0.01007	0.177604	0.452375
0.684981	-0.01141	0.177511	0.452621
0.685814	-0.013371	0.177264	0.453032
0.686647	-0.013137	0.176032	0.452745
0.68748	-0.012362	0.176108	0.451794
0.688313	-0.013534	0.177272	0.450593
0.689146	-0.014397	0.178035	0.449603
0.689978	-0.014714	0.177744	0.44889
0.690811	-0.015201	0.17708	0.447572
0.691644	-0.014753	0.177197	0.447066
0.692477	-0.015279	0.176691	0.447565
0.69331	-0.016822	0.176124	0.446174
0.694143	-0.018352	0.175922	0.444366
0.694976	-0.017766	0.176026	0.443363
0.695809	-0.018465	0.17606	0.442761
0.696641	-0.019068	0.17564	0.441951
0.697474	-0.019036	0.175935	0.441235
0.698307	-0.02	0.176295	0.444161
0.69914	-0.019593	0.177026	0.449173
0.699973	-0.018865	0.177913	0.452305
0.700806	-0.020034	0.177298	0.454846
0.701639	-0.019639	0.176487	0.456422
0.702471	-0.019131	0.176239	0.456686
0.703304	-0.020352	0.176678	0.455941
0.704137	-0.020308	0.177722	0.455235
0.70497	-0.020912	0.178303	0.454026
0.705803	-0.020404	0.178385	0.453517
0.706636	-0.019889	0.177533	0.452742
0.707469	-0.019697	0.177219	0.452004
0.708301	-0.019782	0.176991	0.45152
0.709134	-0.019104	0.175975	0.450652
0.709967	-0.018793	0.176029	0.450397
0.7108	-0.018172	0.176129	0.451188
0.711633	-0.018359	0.17574	0.452762
0.712466	-0.019505	0.175376	0.453884
0.713299	-0.020308	0.17587	0.453609
0.714132	-0.01971	0.176542	0.453525
0.714964	-0.020442	0.176512	0.453433
0.715797	-0.019911	0.176199	0.453333
0.71663	-0.019751	0.176802	0.453506
0.717463	-0.021242	0.178522	0.45364
0.718296	-0.022813	0.178925	0.453477
0.719129	-0.022115	0.178109	0.450972
0.719962	-0.022677	0.176603	0.445455
0.720794	-0.025033	0.175728	0.441203
0.721627	-0.025238	0.175661	0.437681
0.72246	-0.024804	0.176415	0.434974
0.723293	-0.024299	0.176404	0.43413
0.724126	-0.024772	0.176208	0.434329
0.724959	-0.025065	0.175995	0.433492
0.725792	-0.025576	0.175071	0.432874
0.726624	-0.026084	0.17508	0.432282
0.727457	-0.027119	0.176242	0.432386
0.72829	-0.026295	0.176953	0.431759
0.729123	-0.026712	0.17711	0.430706
0.729956	-0.026718	0.177831	0.431417
0.730789	-0.026099	0.178028	0.432474
0.731622	-0.025785	0.178691	0.432036
0.732455	-0.025802	0.178863	0.430058
0.733287	-0.025625	0.179859	0.42751
0.73412	-0.02526	0.180673	0.426318
0.734953	-0.025305	0.181525	0.426504
0.735786	-0.02499	0.182293	0.427321
0.736619	-0.024355	0.182833	0.427485
0.737452	-0.024143	0.182564	0.426124
0.738285	-0.023929	0.181809	0.424424
0.739117	-0.02258	0.181145	0.423077
0.73995	-0.022896	0.18274	0.421962
0.740783	-0.022027	0.184516	0.422082
0.741616	-0.020839	0.186053	0.422237
0.742449	-0.020422	0.186851	0.422351
0.743282	-0.020201	0.186279	0.42192
0.744115	-0.022195	0.185798	0.420464
0.744947	-0.021532	0.185955	0.419703
0.74578	-0.022747	0.186093	0.419492
0.746613	-0.023287	0.186869	0.419006
0.747446	-0.022256	0.186899	0.419692
0.748279	-0.022034	0.186496	0.419333
0.749112	-0.023314	0.186635	0.419001
0.749945	-0.023022	0.186065	0.419377
0.750778	-0.02238	0.185721	0.418575
0.75161	-0.023025	0.185585	0.417539
0.752443	-0.023085	0.185176	0.416735
0.753276	-0.023747	0.185183	0.417459
0.754109	-0.024526	0.18451	0.419294
0.754942	-0.024709	0.183425	0.420489
0.755775	-0.02394	0.182593	0.420761
0.756608	-0.023485	0.182519	0.42013
0.75744	-0.024062	0.182921	0.420522
0.758273	-0.026031	0.182856	0.420527
0.759106	-0.025951	0.181433	0.421268
0.759939	-0.026376	0.180291	0.422301
0.760772	-0.026062	0.179434	0.422857
0.761605	-0.026326	0.178275	0.423106
0.762438	-0.025549	0.177043	0.422814
0.76327	-0.025465	0.176399	0.422729
0.764103	-0.026705	0.176922	0.423318
0.764936	-0.026108	0.177442	0.423838
0.765769	-0.026958	0.177423	0.423588
0.766602	-0.026847	0.176722	0.424245
0.767435	-0.027155	0.176121	0.425126
0.768268	-0.028175	0.176291	0.424583
0.769101	-0.02722	0.176603	0.425135
0.769933	-0.027896	0.176885	0.425591
0.770766	-0.029177	0.177334	0.425009
0.771599	-0.029765	0.176869	0.425415
0.772432	-0.030489	0.176649	0.425343
0.773265	-0.030603	0.176078	0.425194
0.774098	-0.029271	0.1766	0.424701
0.774931	-0.029266	0.177905	0.422621
0.775763	-0.030495	0.178537	0.421381
0.776596	-0.030904	0.178584	0.421487
0.777429	-0.031568	0.177824	0.421371
0.778262	-0.031838	0.176743	0.419758
0.779095	-0.031027	0.17669	0.419877
0.779928	-0.030475	0.177662	0.420265
0.780761	-0.029129	0.178178	0.420156
0.781594	-0.029228	0.178254	0.420032
0.782426	-0.028612	0.177984	0.420614
0.783259	-0.029869	0.178117	0.421896
0.784092	-0.028813	0.178651	0.422731
0.784925	-0.02896	0.178497	0.421819
0.785758	-0.027712	0.178178	0.421922
0.786591	-0.027869	0.178626	0.422291
0.787424	-0.027682	0.179043	0.421467
0.788256	-0.026609	0.178963	0.421488
0.789089	-0.026107	0.178649	0.421448
0.789922	-0.025873	0.178111	0.421644
0.790755	-0.026436	0.177839	0.422196
0.791588	-0.026342	0.177585	0.422312
0.792421	-0.026263	0.177541	0.422068
0.793254	-0.025345	0.176957	0.421824
0.794086	-0.026551	0.176616	0.421849
0.794919	-0.027657	0.176725	0.421062
0.795752	-0.02742	0.176131	0.421967
0.796585	-0.02608	0.176516	0.422211
0.797418	-0.027197	0.177495	0.420943
0.798251	-0.027325	0.17798	0.420307
0.799084	-0.027386	0.178815	0.421523
0.799917	-0.026979	0.179183	0.422512
0.800749	-0.028475	0.17963	0.421789
0.801582	-0.029975	0.180811	0.421696
0.802415	-0.030442	0.181499	0.421968
0.803248	-0.031449	0.1824	0.42028
0.804081	-0.031398	0.18328	0.418023
0.804914	-0.03154	0.183468	0.417596
0.805747	-0.031424	0.183504	0.418737
0.806579	-0.031623	0.183895	0.41872
0.807412	-0.030396	0.184252	0.41786
0.808245	-0.029707	0.184504	0.417306
0.809078	-0.030504	0.185151	0.415611
0.809911	-0.030956	0.185187	0.414021
0.810744	-0.032989	0.185473	0.412829
0.811577	-0.032306	0.185291	0.411901
0.812409	-0.031497	0.185155	0.411996
0.813242	-0.031281	0.185706	0.412424
0.814075	-0.031983	0.186796	0.412935
0.814908	-0.030933	0.187499	0.41254
0.815741	-0.030808	0.188155	0.412765
0.816574	-0.030769	0.188761	0.41254
0.817407	-0.029869	0.187995	0.412706
0.81824	-0.030034	0.187762	0.413056
0.819072	-0.031412	0.188592	0.413243
0.819905	-0.030949	0.188788	0.412289
0.820738	-0.029407	0.188622	0.411108
0.821571	-0.028317	0.188568	0.410779
0.822404	-0.029558	0.188534	0.409729
0.823237	-0.030807	0.188845	0.40853
0.824069	-0.030764	0.188968	0.408978
0.824902	-0.030049	0.188234	0.409134
0.825735	-0.031063	0.187157	0.408647
0.826568	-0.032337	0.186785	0.408491
0.827401	-0.033637	0.187045	0.40837
0.828234	-0.034399	0.187176	0.408925
0.829067	-0.034966	0.187244	0.409241
0.8299	-0.035124	0.187567	0.410383
0.830732	-0.034829	0.188317	0.410335
0.831565	-0.033804	0.187941	0.409203
0.832398	-0.034171	0.188336	0.408565
0.833231	-0.034757	0.188757	0.407666
0.834064	-0.034606	0.189149	0.406727
0.834897	-0.034667	0.189086	0.405404
0.83573	-0.034976	0.188952	0.405161
0.836562	-0.033923	0.188367	0.405102
0.837395	-0.034247	0.187218	0.403933
0.838228	-0.035244	0.18721	0.403409
0.839061	-0.035844	0.187208	0.403387
0.839894	-0.034775	0.186935	0.403721
0.840727	-0.034797	0.186359	0.403349
0.84156	-0.035783	0.185753	0.403552
0.842393	-0.03677	0.185401	0.403163
0.843225	-0.034855	0.185403	0.403218
0.844058	-0.033413	0.185195	0.403173
0.844891	-0.033441	0.184391	0.402514
0.845724	-0.033325	0.184257	0.402495
0.846557	-0.032999	0.185799	0.401181
0.84739	-0.032148	0.187214	0.400078
0.848223	-0.032209	0.186897	0.400445
0.849055	-0.032181	0.186695	0.399916
0.849888	-0.032063	0.186221	0.399298
0.850721	-0.031133	0.18504	0.398934
0.851554	-0.031162	0.183669	0.399221
0.852387	-0.030637	0.184194	0.399899
0.85322	-0.031101	0.184766	0.399331
0.854053	-0.030431	0.18461	0.398516
0.854885	-0.030194	0.184492	0.397965
0.855718	-0.028695	0.183553	0.397664
0.856551	-0.027983	0.183025	0.396608
0.857384	-0.028798	0.183113	0.395536
0.858217	-0.028507	0.183544	0.395795
0.85905	-0.028146	0.18356	0.395386
0.859883	-0.026921	0.182964	0.394399
0.860716	-0.026038	0.182614	0.393242
0.861548	-0.025883	0.182726	0.392439
0.862381	-0.025929	0.182675	0.391458
0.863214	-0.025633	0.182723	0.391562
0.864047	-0.025048	0.182578	0.391429
0.86488	-0.024648	0.182307	0.390414
0.865713	-0.024549	0.181939	0.389423
0.866546	-0.024175	0.181332	0.389132
0.867378	-0.024008	0.181093	0.389885
0.868211	-0.024552	0.180133	0.389882
0.869044	-0.023305	0.179049	0.388951
0.869877	-0.023448	0.178519	0.388107
0.87071	-0.023284	0.178186	0.387657
0.871543	-0.02245	0.178085	0.387424
0.872376	-0.022129	0.178439	0.387901
0.873208	-0.021399	0.177797	0.389082
0.874041	-0.019544	0.176813	0.38938
0.874874	-0.021347	0.176471	0.39011
0.875707	-0.022505	0.176251	0.391712
0.87654	-0.022903	0.177135	0.39317
0.877373	-0.023488	0.178045	0.39389
0.878206	-0.023563	0.177618	0.394535
0.879039	-0.023256	0.1772	0.395032
0.879871	-0.023125	0.177334	0.394971
0.880704	-0.023402	0.177159	0.395722
0.881537	-0.023205	0.177069	0.396209
0.88237	-0.022023	0.177309	0.396745
0.883203	-0.021105	0.177138	0.396958
0.884036	-0.020611	0.177331	0.39582
0.884869	-0.022493	0.177541	0.395671
0.885701	-0.02398	0.176874	0.396042
0.886534	-0.024057	0.176637	0.39623
0.887367	-0.025208	0.176575	0.396026
0.8882	-0.026173	0.175139	0.395792
0.889033	-0.025256	0.174994	0.395703
0.889866	-0.025275	0.176519	0.395574
0.890699	-0.024929	0.176737	0.396289
0.891531	-0.025177	0.176822	0.396785
0.892364	-0.026271	0.177628	0.396945
0.893197	-0.027218	0.17804	0.396488
0.89403	-0.02863	0.178345	0.395387
0.894863	-0.029982	0.179246	0.396267
0.895696	-0.029272	0.179758	0.39668
0.896529	-0.028781	0.179223	0.3956
0.897362	-0.029723	0.178503	0.394611
0.898194	-0.030381	0.177678	0.395281
0.899027	-0.031414	0.177587	0.396027
0.89986	-0.032092	0.178028	0.395942
0.900693	-0.032269	0.177533	0.396352
0.901526	-0.032004	0.177443	0.395743
0.902359	-0.033482	0.177603	0.393951
0.903192	-0.03554	0.177575	0.392466
0.904024	-0.036998	0.178166	0.392982
0.904857	-0.036943	0.17735	0.394133
0.90569	-0.036532	0.176078	0.39399
0.906523	-0.035623	0.17648	0.394185
0.907356	-0.0348	0.177782	0.395229
0.908189	-0.034356	0.179161	0.395659
0.909022	-0.033576	0.180195	0.395351
0.909854	-0.03372	0.180701	0.39459
0.910687	-0.034216	0.180935	0.394043
0.91152	-0.034059	0.181062	0.393998
0.912353	-0.034382	0.182308	0.394082
0.913186	-0.034652	0.183098	0.393568
0.914019	-0.034135	0.183265	0.393497
0.914852	-0.033401	0.183285	0.393464
0.915685	-0.032067	0.182045	0.392731
0.916517	-0.031213	0.181732	0.392275
0.91735	-0.030551	0.182551	0.392395
0.918183	-0.030354	0.182698	0.392259
0.919016	-0.031397	0.183107	0.391104
0.919849	-0.030473	0.183377	0.390269
0.920682	-0.03043	0.182773	0.389767
0.921515	-0.031102	0.18265	0.38934
0.922347	-0.031545	0.182433	0.389041
0.92318	-0.030949	0.181827	0.389266
0.924013	-0.029374	0.180542	0.389601
0.924846	-0.028826	0.179724	0.388842
0.925679	-0.027375	0.180042	0.388073
0.926512	-0.026836	0.18053	0.38838
0.927345	-0.027203	0.180333	0.388935
0.928177	-0.027612	0.180114	0.388597
0.92901	-0.028042	0.180502	0.388135
0.929843	-0.028578	0.180909	0.388257
0.930676	-0.028658	0.180859	0.388366
0.931509	-0.027484	0.180313	0.388135
0.932342	-0.026791	0.180067	0.387641
0.933175	-0.026665	0.179171	0.387398
0.934008	-0.02579	0.178562	0.38699
0.93484	-0.024713	0.178098	0.38582
0.935673	-0.024559	0.17702	0.385633
0.936506	-0.026003	0.176418	0.385611
0.937339	-0.025738	0.176679	0.385311
0.938172	-0.026684	0.177349	0.38494
0.939005	-0.026298	0.177884	0.385201
0.939838	-0.024288	0.178187	0.385744
0.94067	-0.024131	0.177736	0.385516
0.941503	-0.024003	0.177292	0.384616
0.942336	-0.023781	0.178259	0.384138
0.943169	-0.02308	0.179392	0.384628
0.944002	-0.021954	0.180018	0.386096
0.944835	-0.02305	0.181211	0.387533
0.945668	-0.023482	0.182583	0.388601
0.9465	-0.02521	0.183129	0.389713
0.947333	-0.025165	0.182693	0.389426
0.948166	-0.024075	0.182167	0.389214
0.948999	-0.024354	0.181595	0.389709
0.949832	-0.023422	0.18031	0.389564
0.950665	-0.022955	0.178524	0.388819
0.951498	-0.023733	0.177554	0.388907
0.952331	-0.025634	0.176608	0.389583
0.953163	-0.027426	0.175632	0.389228
0.953996	-0.026416	0.175448	0.38905
0.954829	-0.026253	0.174591	0.389144
0.955662	-0.02738	0.174537	0.38948
0.956495	-0.027984	0.175822	0.389888
0.957328	-0.027293	0.177768	0.389893
0.958161	-0.027153	0.17828	0.390462
0.958993	-0.026147	0.177349	0.390154
0.959826	-0.02687	0.176688	0.389116
0.960659	-0.027868	0.175671	0.388826
0.961492	-0.028649	0.176287	0.388483
0.962325	-0.028988	0.177957	0.388702
0.963158	-0.029342	0.178213	0.389573
0.963991	-0.030177	0.17739	0.38896
0.964823	-0.031446	0.177228	0.387303
0.965656	-0.031764	0.176999	0.386061
0.966489	-0.032667	0.176125	0.385645
0.967322	-0.033118	0.175821	0.385217
0.968155	-0.033014	0.177095	0.385941
0.968988	-0.033652	0.177052	0.385766
0.969821	-0.033671	0.176195	0.385054
0.970654	-0.034748	0.176264	0.3852
0.971486	-0.035484	0.177167	0.385625
0.972319	-0.034382	0.177696	0.38512
0.973152	-0.033421	0.179441	0.384525
0.973985	-0.032617	0.1811	0.385117
0.974818	-0.033535	0.181507	0.384703
0.975651	-0.032949	0.181898	0.384473
0.976484	-0.033066	0.182005	0.384556
0.977316	-0.03295	0.181707	0.385031
0.978149	-0.03294	0.180358	0.385221
0.978982	-0.032959	0.179048	0.384064
0.979815	-0.03332	0.178745	0.383156
0.980648	-0.032179	0.178565	0.382701
0.981481	-0.031303	0.178852	0.382316
0.982314	-0.031084	0.177925	0.381872
0.983146	-0.031001	0.17684	0.380912
0.983979	-0.030723	0.17599	0.37996
0.984812	-0.030001	0.175553	0.379975
0.985645	-0.029181	0.175677	0.380421
0.986478	-0.02861	0.176161	0.380328
0.987311	-0.026832	0.175946	0.380135
0.988144	-0.026475	0.175496	0.37989
0.988977	-0.026541	0.17464	0.379245
0.989809	-0.026912	0.174854	0.379147
0.990642	-0.027255	0.175512	0.379253
0.991475	-0.025778	0.175638	0.378791
0.992308	-0.024814	0.175443	0.378302
0.993141	-0.024233	0.175342	0.378831
0.993974	-0.024366	0.17421	0.379548
0.994807	-0.024009	0.173316	0.379567
0.995639	-0.024424	0.173016	0.380137
0.996472	-0.025774	0.17349	0.380115
0.997305	-0.025566	0.1731	0.37959
0.998138	-0.026151	0.172218	0.378725
0.998971	-0.027248	0.173069	0.378326
0.999804	-0.028597	0.173951	0.378742
1.00064	-0.029321	0.173479	0.379955
1.00147	-0.029924	0.17297	0.381608
1.0023	-0.029446	0.172584	0.381157
1.00314	-0.028037	0.172244	0.380536
1.00397	-0.027609	0.171533	0.381126
1.0048	-0.027224	0.171843	0.380603
1.00563	-0.025549	0.172386	0.376808
1.00647	-0.026768	0.17161	0.376537
1.0073	-0.025717	0.173282	0.374493
1.00813	-0.025557	0.171809	0.374826
1.00896	-0.026549	0.172961	0.376561
1.0098	-0.026357	0.174172	0.377382
1.01063	-0.02684	0.173759	0.376959
1.01146	-0.026841	0.173279	0.377259
1.0123	-0.026349	0.17372	0.377279
1.01313	-0.026022	0.172809	0.376069
1.01396	-0.026129	0.172182	0.376746
1.01479	-0.026035	0.174728	0.37531
1.01563	-0.025126	0.173843	0.375267
1.01646	-0.024198	0.172556	0.374123
1.01729	-0.022988	0.172722	0.375104
1.01813	-0.023228	0.175195	0.37363
1.01896	-0.02333	0.175807	0.373217
1.01979	-0.023814	0.17681	0.376052
1.02062	-0.023982	0.179219	0.375705
1.02146	-0.023666	0.181195	0.376143
1.02229	-0.024067	0.181087	0.3765
1.02312	-0.023816	0.181575	0.377236
1.02396	-0.025184	0.183022	0.379903
1.02479	-0.026425	0.183118	0.380863
1.02562	-0.02648	0.183219	0.382642
1.02645	-0.025964	0.183409	0.382113
1.02729	-0.024782	0.183488	0.382934
1.02812	-0.024307	0.182226	0.384295
1.02895	-0.023959	0.183348	0.383424
1.02979	-0.024022	0.183259	0.382041
1.03062	-0.025289	0.181872	0.380665
1.03145	-0.026329	0.182122	0.380856
1.03228	-0.026364	0.182826	0.379278
1.03312	-0.027336	0.182764	0.379704
1.03395	-0.026961	0.183463	0.380396
1.03478	-0.026599	0.182848	0.381216
1.03562	-0.026629	0.180817	0.383775
1.03645	-0.027474	0.181679	0.382781
1.03728	-0.027586	0.18241	0.383275
1.03811	-0.027809	0.182275	0.380975
1.03895	-0.027017	0.181048	0.381021
1.03978	-0.027121	0.181219	0.382057
1.04061	-0.028818	0.181571	0.380516
1.04145	-0.030252	0.180198	0.382703
1.04228	-0.029473	0.179564	0.383359
1.04311	-0.028645	0.179513	0.38357
1.04394	-0.028998	0.178485	0.384278
1.04478	-0.028619	0.177789	0.383115
1.04561	-0.028659	0.178001	0.382114
1.04644	-0.028483	0.179323	0.379637
1.04728	-0.028646	0.179509	0.380194
1.04811	-0.02978	0.179919	0.378993
1.04894	-0.030557	0.180766	0.3788
1.04977	-0.03158	0.180399	0.37924
1.05061	-0.032526	0.179825	0.380488
1.05144	-0.032293	0.179984	0.381698
1.05227	-0.032494	0.179727	0.382767
1.05311	-0.033038	0.180171	0.383216
1.05394	-0.032845	0.179006	0.383633
1.05477	-0.033265	0.177916	0.382903
1.05561	-0.034653	0.178592	0.382196
1.05644	-0.034726	0.178275	0.380385
1.05727	-0.033331	0.178298	0.381063
1.0581	-0.034183	0.177191	0.382206
1.05894	-0.034419	0.175382	0.382398
1.05977	-0.03399	0.174587	0.382517
1.0606	-0.033875	0.175379	0.381423
1.06144	-0.033513	0.174387	0.381487
1.06227	-0.032993	0.1749	0.380437
1.0631	-0.034421	0.173071	0.379164
1.06393	-0.035148	0.172935	0.378622
1.06477	-0.035076	0.171866	0.379429
1.0656	-0.035822	0.171494	0.379737
1.06643	-0.037061	0.170277	0.381226
1.06727	-0.037439	0.168326	0.383194
1.0681	-0.037367	0.166538	0.383915
1.06893	-0.037366	0.167479	0.383731
1.06976	-0.038229	0.167808	0.384346
1.0706	-0.038149	0.167669	0.385578
1.07143	-0.037291	0.166734	0.384548
1.07226	-0.035862	0.166517	0.384617
1.0731	-0.035147	0.166937	0.38426
1.07393	-0.035358	0.166736	0.384926
1.07476	-0.035471	0.168102	0.383774
1.07559	-0.033631	0.169004	0.384542
1.07643	-0.032452	0.168069	0.38388
1.07726	-0.031882	0.169372	0.38447
1.07809	-0.033073	0.168334	0.386477
1.07893	-0.032949	0.168299	0.386437
1.07976	-0.033078	0.171408	0.388372
1.08059	-0.033865	0.17283	0.389342
1.08142	-0.033285	0.172697	0.390798
1.08226	-0.03271	0.173691	0.39186
1.08309	-0.03084	0.173451	0.392615
1.08392	-0.029957	0.174708	0.393349
1.08476	-0.030854	0.17411	0.392042
1.08559	-0.032371	0.175094	0.391207
1.08642	-0.032395	0.175436	0.391987
1.08725	-0.031	0.175446	0.391425
1.08809	-0.031109	0.176574	0.391817
1.08892	-0.031493	0.178028	0.391071
1.08975	-0.031425	0.177308	0.391937
1.09059	-0.03128	0.176167	0.390409
1.09142	-0.031189	0.17522	0.390148
1.09225	-0.031263	0.175886	0.391607
1.09308	-0.033675	0.176963	0.389765
1.09392	-0.033451	0.176341	0.390189
1.09475	-0.032811	0.175717	0.390285
1.09558	-0.033342	0.174529	0.390145
1.09642	-0.034545	0.17406	0.389668
1.09725	-0.034799	0.174939	0.390833
1.09808	-0.03554	0.174709	0.391311
1.09892	-0.035305	0.175853	0.390462
1.09975	-0.034756	0.175482	0.389393
1.10058	-0.035438	0.173721	0.389335
1.10141	-0.034741	0.172296	0.388391
1.10225	-0.035086	0.171461	0.387579
1.10308	-0.035862	0.170866	0.386542
1.10391	-0.036829	0.170729	0.386072
1.10475	-0.036661	0.171276	0.385095
1.10558	-0.036286	0.171247	0.385862
1.10641	-0.034542	0.170964	0.3848
1.10724	-0.033882	0.169217	0.384126
1.10808	-0.033937	0.16954	0.383642
1.10891	-0.033521	0.16875	0.381335
1.10974	-0.032521	0.169228	0.381413
1.11058	-0.0313	0.169424	0.381434
1.11141	-0.029645	0.170433	0.382748
1.11224	-0.028907	0.172717	0.381246
1.11307	-0.028781	0.173509	0.379521
1.11391	-0.02708	0.172678	0.381561
1.11474	-0.027543	0.173134	0.380435
1.11557	-0.02733	0.173788	0.378933
1.11641	-0.02709	0.174211	0.378982
1.11724	-0.027105	0.176339	0.379512
1.11807	-0.027957	0.176796	0.37786
1.1189	-0.026704	0.176217	0.377797
1.11974	-0.026321	0.17684	0.376833
1.12057	-0.026555	0.178013	0.377111
1.1214	-0.025508	0.179151	0.376669
1.12224	-0.025011	0.180023	0.376688
1.12307	-0.025503	0.180151	0.376099
1.1239	-0.025588	0.180269	0.376133
1.12473	-0.02607	0.180171	0.376292
1.12557	-0.027766	0.179562	0.37731
1.1264	-0.027465	0.179751	0.378228
1.12723	-0.028964	0.179513	0.377854
1.12807	-0.029768	0.179945	0.378402
1.1289	-0.030257	0.181384	0.37811
1.12973	-0.030988	0.182379	0.379206
1.13056	-0.031109	0.181595	0.378815
1.1314	-0.031583	0.181037	0.378741
1.13223	-0.032078	0.180053	0.377139
1.13306	-0.032183	0.17936	0.377759
1.1339	-0.032392	0.178197	0.377859
1.13473	-0.032532	0.17879	0.377442
1.13556	-0.032231	0.179251	0.377061
1.13639	-0.032053	0.179098	0.378025
1.13723	-0.031697	0.179467	0.378344
1.13806	-0.032623	0.178069	0.37666
1.13889	-0.031482	0.177766	0.378291
1.13973	-0.032446	0.178597	0.376657
1.14056	-0.033151	0.178515	0.376111
1.14139	-0.033629	0.17904	0.376719
1.14222	-0.034404	0.178382	0.377435
1.14306	-0.035051	0.178626	0.376354
1.14389	-0.035304	0.177727	0.375508
1.14472	-0.033733	0.177306	0.375092
1.14556	-0.034269	0.177029	0.374803
1.14639	-0.03231	0.175885	0.373529
1.14722	-0.032309	0.176389	0.371985
1.14805	-0.030728	0.177581	0.372017
1.14889	-0.029843	0.178354	0.37108
1.14972	-0.030103	0.176799	0.371059
1.15055	-0.029625	0.175633	0.370698
1.15139	-0.030057	0.176223	0.37163
1.15222	-0.029688	0.176075	0.373169
1.15305	-0.029062	0.175818	0.37476
1.15388	-0.028811	0.175418	0.376292
1.15472	-0.027767	0.17508	0.375735
1.15555	-0.028186	0.173678	0.375085
1.15638	-0.028052	0.172732	0.376017
1.15722	-0.029453	0.17321	0.375732
1.15805	-0.028381	0.173047	0.376697
1.15888	-0.026822	0.171389	0.377444
1.15971	-0.026482	0.169817	0.376449
1.16055	-0.02485	0.168523	0.378597
1.16138	-0.025274	0.167738	0.379114
1.16221	-0.023331	0.167682	0.379197
1.16305	-0.021643	0.167864	0.37833
1.16388	-0.022026	0.167664	0.379725
1.16471	-0.020256	0.168344	0.381761
1.16554	-0.021713	0.168153	0.38213
1.16638	-0.020765	0.168311	0.381836
1.16721	-0.021446	0.170011	0.382912
1.16804	-0.020876	0.17003	0.38356
1.16888	-0.020686	0.168746	0.384762
1.16971	-0.020876	0.16812	0.38488
1.17054	-0.020043	0.168644	0.385836
1.17137	-0.019418	0.169499	0.386427
1.17221	-0.018897	0.16901	0.385695
1.17304	-0.019399	0.169855	0.38378
1.17387	-0.020785	0.16968	0.382819
1.17471	-0.021635	0.16937	0.381794
1.17554	-0.023265	0.170253	0.38293
1.17637	-0.023131	0.171874	0.383204
1.1772	-0.023015	0.172804	0.38273
1.17804	-0.021015	0.172093	0.382959
1.17887	-0.022763	0.17253	0.383054
1.1797	-0.023433	0.173353	0.384531
1.18053	-0.023303	0.173739	0.385856
1.18137	-0.024782	0.174632	0.385433
1.1822	-0.022988	0.175148	0.386122
1.18303	-0.02338	0.17449	0.384528
1.18387	-0.024595	0.17529	0.384745
1.1847	-0.025326	0.175675	0.384682
1.18553	-0.02632	0.175762	0.383286
1.18636	-0.024778	0.176943	0.383084
1.1872	-0.024631	0.177483	0.38378
1.18803	-0.02325	0.1769	0.383095
1.18886	-0.022718	0.176401	0.38386
1.1897	-0.02178	0.176176	0.384514
1.19053	-0.021414	0.17628	0.384263
1.19136	-0.021416	0.176039	0.384526
1.19219	-0.021387	0.175832	0.384109
1.19303	-0.022596	0.176832	0.383979
1.19386	-0.021759	0.176232	0.383496
1.19469	-0.020925	0.176561	0.383252
1.19553	-0.020457	0.176324	0.383723
1.19636	-0.01992	0.175826	0.383717
1.19719	-0.017921	0.175002	0.384151
1.19802	-0.017478	0.175766	0.384673
1.19886	-0.018128	0.175158	0.384553
1.19969	-0.016748	0.174912	0.384161
1.20052	-0.016359	0.174602	0.383988
1.20136	-0.01728	0.175644	0.384099
1.20219	-0.016819	0.17462	0.383875
1.20302	-0.017705	0.174085	0.384016
1.20385	-0.019223	0.174561	0.384898
1.20469	-0.01939	0.173502	0.384343
1.20552	-0.019554	0.172036	0.384689
1.20635	-0.019428	0.171529	0.384618
1.20719	-0.020623	0.170402	0.384765
1.20802	-0.021259	0.168553	0.383698
1.20885	-0.022005	0.168911	0.384045
1.20968	-0.023002	0.169544	0.383663
1.21052	-0.023463	0.169633	0.382791
1.21135	-0.02425	0.16888	0.383232
1.21218	-0.024518	0.16791	0.38238
1.21302	-0.025287	0.167797	0.383051
1.21385	-0.025014	0.165961	0.383924
1.21468	-0.02618	0.165244	0.384225
1.21551	-0.025424	0.165564	0.386729
1.21635	-0.02479	0.165774	0.386417
1.21718	-0.02456	0.166373	0.386757
1.21801	-0.026631	0.16593	0.386212
1.21885	-0.027393	0.164258	0.385306
1.21968	-0.026975	0.165464	0.38551
1.22051	-0.027195	0.165597	0.385882
1.22134	-0.028511	0.16647	0.384927
1.22218	-0.028728	0.166059	0.385684
1.22301	-0.029898	0.165899	0.38497
1.22384	-0.028984	0.165675	0.384872
1.22468	-0.027881	0.165656	0.385433
1.22551	-0.026873	0.16518	0.385695
1.22634	-0.02759	0.165253	0.38544
1.22717	-0.026812	0.165731	0.387013
1.22801	-0.026385	0.166691	0.388368
1.22884	-0.025611	0.167695	0.389815
1.22967	-0.026055	0.167168	0.390708
1.23051	-0.025836	0.167364	0.3925
1.23134	-0.02672	0.169141	0.39298
1.23217	-0.026253	0.170432	0.393167
1.23301	-0.026135	0.170568	0.393328
1.23384	-0.025552	0.169662	0.392745
1.23467	-0.025402	0.169967	0.393223
1.2355	-0.024724	0.170075	0.394628
1.23634	-0.026619	0.169703	0.393843
1.23717	-0.028183	0.169076	0.393557
1.238	-0.027303	0.168464	0.393611
1.23884	-0.027404	0.169228	0.393962
1.23967	-0.026973	0.170289	0.393886
1.2405	-0.027453	0.170076	0.393559
1.24133	-0.026581	0.169593	0.393612
1.24217	-0.025519	0.169144	0.394498
1.243	-0.024766	0.168923	0.394011
1.24383	-0.0236	0.170489	0.394947
1.24467	-0.023924	0.171594	0.39464
1.2455	-0.023742	0.171082	0.39531
1.24633	-0.024212	0.172175	0.395322
1.24716	-0.021816	0.173359	0.395838
1.248	-0.022655	0.174067	0.395167
1.24883	-0.02318	0.173515	0.394994
1.24966	-0.024087	0.172746	0.395373
1.2505	-0.023917	0.172088	0.396016
1.25133	-0.024644	0.171316	0.395939
1.25216	-0.025711	0.169871	0.395722
1.25299	-0.025536	0.169138	0.396667
1.25383	-0.025769	0.169515	0.396584
1.25466	-0.026123	0.171239	0.396945
1.25549	-0.024915	0.172038	0.396686
1.25633	-0.024572	0.173371	0.39723
1.25716	-0.024187	0.174405	0.3975
1.25799	-0.023137	0.175036	0.398556
1.25882	-0.024749	0.175123	0.398561
1.25966	-0.024081	0.17531	0.398845
1.26049	-0.02301	0.175077	0.399814
1.26132	-0.023715	0.174916	0.400274
1.26216	-0.025547	0.175243	0.400306
1.26299	-0.025973	0.176459	0.401137
1.26382	-0.026008	0.17727	0.401117
1.26465	-0.026396	0.176033	0.401912
1.26549	-0.026735	0.175483	0.402729
1.26632	-0.026215	0.175019	0.402779
1.26715	-0.02643	0.17473	0.403561
1.26799	-0.027882	0.174326	0.403778
1.26882	-0.02717	0.173821	0.403924
1.26965	-0.027005	0.17373	0.40363
1.27048	-0.026031	0.174315	0.403075
1.27132	-0.025378	0.174914	0.403306
1.27215	-0.02287	0.17403	0.402653
1.27298	-0.020722	0.17415	0.402257
1.27382	-0.021457	0.174404	0.402029
1.27465	-0.020936	0.174728	0.402598
1.27548	-0.020021	0.173768	0.402322
1.27631	-0.019983	0.173202	0.403638
1.27715	-0.02094	0.173576	0.403023
1.27798	-0.020995	0.173829	0.40346
1.27881	-0.02031	0.173733	0.403071
1.27965	-0.019886	0.174444	0.403102
1.28048	-0.020711	0.174758	0.403957
1.28131	-0.0208	0.174588	0.405154
1.28214	-0.019517	0.175471	0.406426
1.28298	-0.0187	0.174964	0.405406
1.28381	-0.01809	0.172828	0.404517
1.28464	-0.018618	0.173045	0.405276
1.28548	-0.019213	0.174696	0.404042
1.28631	-0.019973	0.174908	0.403554
1.28714	-0.020813	0.177192	0.404274
1.28797	-0.020495	0.178133	0.405396
1.28881	-0.018929	0.179026	0.405737
1.28964	-0.019336	0.179197	0.407788
1.29047	-0.018755	0.179444	0.409928
1.29131	-0.016884	0.179543	0.411211
1.29214	-0.016985	0.179066	0.411099
1.29297	-0.018883	0.179113	0.410906
1.29381	-0.019264	0.179229	0.410779
1.29464	-0.018852	0.179933	0.41136
1.29547	-0.018909	0.179869	0.411335
1.2963	-0.019687	0.180189	0.412251
1.29714	-0.020201	0.180688	0.411303
1.29797	-0.019838	0.179531	0.411338
1.2988	-0.018934	0.179667	0.412023
1.29964	-0.020461	0.179455	0.413486
1.30047	-0.019063	0.178812	0.41406
1.3013	-0.017832	0.17836	0.413247
1.30213	-0.018309	0.179647	0.413232
1.30297	-0.019421	0.179182	0.413459
1.3038	-0.018664	0.179465	0.415664
1.30463	-0.018433	0.18035	0.416633
1.30547	-0.017915	0.180068	0.417431
1.3063	-0.016407	0.180874	0.418852
1.30713	-0.016154	0.181238	0.420368
1.30796	-0.017071	0.179975	0.419441
1.3088	-0.017092	0.178789	0.419729
1.30963	-0.017435	0.177316	0.419473
1.31046	-0.01828	0.177309	0.417686
1.3113	-0.018611	0.177346	0.415633
1.31213	-0.020886	0.177252	0.415096
1.31296	-0.022364	0.17857	0.416487
1.31379	-0.022739	0.179769	0.419309
1.31463	-0.022571	0.180652	0.421009
1.31546	-0.021844	0.18108	0.420974
1.31629	-0.021712	0.181554	0.420575
1.31713	-0.022485	0.181231	0.420706
1.31796	-0.022353	0.180419	0.421295
1.31879	-0.0226	0.180567	0.422361
1.31962	-0.021883	0.179213	0.421616
1.32046	-0.021554	0.179139	0.421169
1.32129	-0.022706	0.179184	0.420424
1.32212	-0.022923	0.179261	0.42096
1.32296	-0.023418	0.178517	0.420835
1.32379	-0.022262	0.178422	0.420773
1.32462	-0.023224	0.178297	0.419627
1.32545	-0.023597	0.178212	0.418633
1.32629	-0.023535	0.177628	0.417792
1.32712	-0.023099	0.17616	0.418182
1.32795	-0.023913	0.176035	0.418118
1.32879	-0.023102	0.175666	0.418736
1.32962	-0.023706	0.175626	0.417668
1.33045	-0.023362	0.176277	0.418386
1.33128	-0.022433	0.17616	0.418821
1.33212	-0.0222	0.176072	0.418906
1.33295	-0.023064	0.176246	0.419225
1.33378	-0.024616	0.175677	0.418628
1.33462	-0.023773	0.175682	0.416697
1.33545	-0.023471	0.174591	0.415915
1.33628	-0.023887	0.174091	0.415586
1.33711	-0.023164	0.175484	0.415659
1.33795	-0.022513	0.176503	0.414978
1.33878	-0.023281	0.177219	0.414307
1.33961	-0.0243	0.176974	0.41341
1.34045	-0.025147	0.177756	0.413828
1.34128	-0.02421	0.178961	0.412956
1.34211	-0.024531	0.179597	0.41307
1.34294	-0.024852	0.180143	0.413114
1.34378	-0.024379	0.179945	0.412937
1.34461	-0.024798	0.179522	0.412305
1.34544	-0.02456	0.179634	0.412943
1.34628	-0.025565	0.180239	0.413348
1.34711	-0.025994	0.182064	0.413363
1.34794	-0.027239	0.18296	0.41294
1.34877	-0.026176	0.1825	0.41156
1.34961	-0.028309	0.182459	0.410787
1.35044	-0.027117	0.183136	0.412043
1.35127	-0.028185	0.182971	0.411928
1.3521	-0.02928	0.18323	0.413162
1.35294	-0.029312	0.183576	0.414759
1.35377	-0.029395	0.18432	0.415089
1.3546	-0.028006	0.18351	0.41443
1.35544	-0.029064	0.182639	0.413774
1.35627	-0.030191	0.182975	0.413755
1.3571	-0.030461	0.182646	0.41335
1.35793	-0.030614	0.180637	0.413642
1.35877	-0.03099	0.180177	0.414077
1.3596	-0.031292	0.1809	0.41577
1.36043	-0.030474	0.18111	0.417273
1.36127	-0.031149	0.181196	0.416979
1.3621	-0.031769	0.181676	0.416988
1.36293	-0.031643	0.181079	0.417598
1.36376	-0.030403	0.180838	0.418024
1.3646	-0.031348	0.180405	0.417798
1.36543	-0.031738	0.180074	0.417791
1.36626	-0.032352	0.18079	0.416968
1.3671	-0.031923	0.180257	0.418023
1.36793	-0.03149	0.179116	0.418426
1.36876	-0.030814	0.178123	0.419482
1.36959	-0.029355	0.177373	0.421466
1.37043	-0.026863	0.177998	0.422933
1.37126	-0.026877	0.178235	0.422672
1.37209	-0.02767	0.178563	0.422849
1.37293	-0.027616	0.179246	0.421947
1.37376	-0.028206	0.179614	0.422485
1.37459	-0.02799	0.179266	0.422605
1.37542	-0.02781	0.180854	0.422873
1.37626	-0.027357	0.181684	0.423983
1.37709	-0.027338	0.181543	0.424889
1.37792	-0.026646	0.181782	0.425672
1.37876	-0.02662	0.1824	0.426332
1.37959	-0.026628	0.182732	0.427114
1.38042	-0.026036	0.182203	0.425622
1.38125	-0.025615	0.181585	0.424875
1.38209	-0.025438	0.180819	0.424564
1.38292	-0.02492	0.180466	0.424791
1.38375	-0.024617	0.180984	0.424602
1.38459	-0.025141	0.181107	0.424832
1.38542	-0.024618	0.18104	0.42492
1.38625	-0.02441	0.181176	0.425597
1.38708	-0.022833	0.181374	0.426886
1.38792	-0.023271	0.183196	0.426784
1.38875	-0.023125	0.183839	0.426008
1.38958	-0.02368	0.184247	0.425228
1.39042	-0.02555	0.185647	0.424162
1.39125	-0.024797	0.185369	0.423246
1.39208	-0.025573	0.183917	0.424001
1.39291	-0.026103	0.182956	0.424389
1.39375	-0.02542	0.182101	0.424516
1.39458	-0.024771	0.18189	0.423805
1.39541	-0.024281	0.182826	0.422921
1.39625	-0.023938	0.182603	0.422938
1.39708	-0.023225	0.182232	0.423422
1.39791	-0.021957	0.182587	0.422734
1.39874	-0.021708	0.182254	0.423493
1.39958	-0.021323	0.182204	0.424949
1.40041	-0.020715	0.182477	0.42515
1.40124	-0.021051	0.182695	0.426235
1.40208	-0.020645	0.183717	0.425629
1.40291	-0.019389	0.183525	0.425122
1.40374	-0.02111	0.182003	0.425189
1.40457	-0.022196	0.18148	0.425878
1.40541	-0.022695	0.180733	0.426263
1.40624	-0.023814	0.181133	0.427393
1.40707	-0.023382	0.18132	0.427052
1.40791	-0.023414	0.180976	0.427571
1.40874	-0.022281	0.179546	0.428371
1.40957	-0.024409	0.17968	0.429844
1.4104	-0.024997	0.179755	0.430412
1.41124	-0.025021	0.179454	0.430897
1.41207	-0.026027	0.178959	0.432015
1.4129	-0.027024	0.179439	0.432166
1.41374	-0.025335	0.179904	0.432463
1.41457	-0.026502	0.179613	0.431821
1.4154	-0.028365	0.17849	0.431138
1.41623	-0.028104	0.176654	0.430686
1.41707	-0.027126	0.17538	0.431056
1.4179	-0.027854	0.175247	0.430866
1.41873	-0.029154	0.175544	0.43125
1.41957	-0.029159	0.175982	0.429378
1.4204	-0.031286	0.175797	0.427175
1.42123	-0.030659	0.174915	0.427115
1.42206	-0.030291	0.173815	0.427292
1.4229	-0.030156	0.172609	0.428033
1.42373	-0.030499	0.172807	0.428576
1.42456	-0.028436	0.173747	0.428859
1.4254	-0.026644	0.173787	0.42949
1.42623	-0.027164	0.174049	0.430098
1.42706	-0.026367	0.174429	0.429742
1.4279	-0.026216	0.174026	0.429706
1.42873	-0.026485	0.173152	0.429604
1.42956	-0.026564	0.172721	0.428117
1.43039	-0.02461	0.172328	0.42696
1.43123	-0.024692	0.171974	0.427211
1.43206	-0.025206	0.171253	0.427535
1.43289	-0.026865	0.171119	0.427195
1.43373	-0.026028	0.171423	0.426271
1.43456	-0.026371	0.171978	0.425747
1.43539	-0.025088	0.1734	0.427081
1.43622	-0.023073	0.175414	0.427949
1.43706	-0.022689	0.176792	0.428922
1.43789	-0.023533	0.17796	0.429169
1.43872	-0.023102	0.177979	0.428924
1.43956	-0.023231	0.177493	0.429401
1.44039	-0.023351	0.1772	0.430594
1.44122	-0.022186	0.177535	0.432067
1.44205	-0.022678	0.177519	0.433165
1.44289	-0.022651	0.177298	0.433691
1.44372	-0.024504	0.177527	0.433923
1.44455	-0.025662	0.177211	0.434882
1.44539	-0.025884	0.176823	0.435915
1.44622	-0.026817	0.177123	0.435502
1.44705	-0.026898	0.179042	0.434484
1.44788	-0.027335	0.180419	0.434281
1.44872	-0.028925	0.181183	0.434872
1.44955	-0.030155	0.181744	0.434868
1.45038	-0.030577	0.183045	0.436167
1.45122	-0.030899	0.183596	0.436408
1.45205	-0.031417	0.183633	0.435372
1.45288	-0.031552	0.184233	0.434566
1.45371	-0.031422	0.1852	0.434131
1.45455	-0.032342	0.185034	0.434844
1.45538	-0.03177	0.184087	0.435376
1.45621	-0.032228	0.182865	0.434079
1.45705	-0.033021	0.18087	0.4328
1.45788	-0.033553	0.179469	0.43239
1.45871	-0.033656	0.179106	0.432418
1.45954	-0.034707	0.179708	0.43297
1.46038	-0.033393	0.179786	0.433661
1.46121	-0.033855	0.18011	0.43454
1.46204	-0.034245	0.179819	0.434287
1.46288	-0.034938	0.180513	0.433541
1.46371	-0.034942	0.181847	0.433268
1.46454	-0.034212	0.182727	0.43327
1.46537	-0.033396	0.184459	0.433899
1.46621	-0.033615	0.185764	0.433825
1.46704	-0.032656	0.185862	0.434565
1.46787	-0.033076	0.184432	0.435194
1.46871	-0.033129	0.183435	0.434952
1.46954	-0.031589	0.184355	0.4356
1.47037	-0.03121	0.184677	0.437119
1.47121	-0.030926	0.183731	0.437785
1.47204	-0.030811	0.184726	0.439915
1.47287	-0.029164	0.185886	0.441879
1.4737	-0.028702	0.186454	0.443247
1.47454	-0.028788	0.186565	0.444188
1.47537	-0.028435	0.187496	0.444194
1.4762	-0.029044	0.188761	0.444084
1.47704	-0.029119	0.18952	0.445208
1.47787	-0.029077	0.191041	0.447454
1.4787	-0.029165	0.191759	0.448303
1.47953	-0.029533	0.191395	0.447952
1.48037	-0.030027	0.191391	0.447625
1.4812	-0.030964	0.191121	0.447491
1.48203	-0.031507	0.190944	0.447058
1.48287	-0.031038	0.191277	0.447116
1.4837	-0.030773	0.190831	0.447313
1.48453	-0.031571	0.19068	0.446224
1.48536	-0.030793	0.190748	0.445749
1.4862	-0.030755	0.190571	0.445375
1.48703	-0.030561	0.19032	0.444929
1.48786	-0.031766	0.190314	0.444916
1.4887	-0.031477	0.190017	0.445172
1.48953	-0.031253	0.188861	0.445212
1.49036	-0.031534	0.187617	0.444789
1.49119	-0.032355	0.188189	0.444675
1.49203	-0.033229	0.189508	0.444291
1.49286	-0.033696	0.188445	0.443901
1.49369	-0.034431	0.187306	0.444138
1.49453	-0.03566	0.186765	0.444025
1.49536	-0.035284	0.186462	0.443916
1.49619	-0.034593	0.185571	0.444297
1.49702	-0.034866	0.185304	0.444513
1.49786	-0.03451	0.185627	0.444965
1.49869	-0.033369	0.184745	0.444633
1.49952	-0.032107	0.184642	0.444765
1.50036	-0.031099	0.184904	0.446043
1.50119	-0.030215	0.184614	0.446856
1.50202	-0.030165	0.184823	0.446411
1.50285	-0.029252	0.185019	0.446305
1.50369	-0.030091	0.18596	0.447416
1.50452	-0.030957	0.186732	0.449349
1.50535	-0.030174	0.186323	0.451744
1.50619	-0.030886	0.186111	0.454001
1.50702	-0.030876	0.186695	0.455285
1.50785	-0.03088	0.187863	0.456938
1.50868	-0.03012	0.188804	0.45843
1.50952	-0.031169	0.189401	0.459146
1.51035	-0.03095	0.190402	0.460755
1.51118	-0.031016	0.190734	0.462168
1.51202	-0.029895	0.190149	0.462933
1.51285	-0.029307	0.189888	0.464278
1.51368	-0.030011	0.190159	0.463405
1.51451	-0.030521	0.190231	0.462373
1.51535	-0.028869	0.190229	0.462987
1.51618	-0.027709	0.190615	0.463429
1.51701	-0.027832	0.192104	0.462613
1.51785	-0.028364	0.192138	0.462893
1.51868	-0.028461	0.191343	0.463387
1.51951	-0.029142	0.192503	0.464094
1.52034	-0.0312	0.193288	0.464921
1.52118	-0.031938	0.193794	0.465364
1.52201	-0.030124	0.195287	0.46559
1.52284	-0.029904	0.19677	0.466865
1.52367	-0.031374	0.197779	0.467882
1.52451	-0.031243	0.197889	0.467536
1.52534	-0.030773	0.197441	0.466597
1.52617	-0.031765	0.197194	0.465948
1.52701	-0.032401	0.198535	0.4654
1.52784	-0.033059	0.199096	0.464677
1.52867	-0.034066	0.198481	0.463927
1.5295	-0.035492	0.197929	0.464075
1.53034	-0.034294	0.197649	0.463769
1.53117	-0.035279	0.197815	0.462775
1.532	-0.036698	0.198695	0.462086
1.53284	-0.037038	0.199365	0.461001
1.53367	-0.037771	0.199223	0.460167
1.5345	-0.037145	0.199301	0.461782
1.53533	-0.037118	0.200023	0.46355
1.53617	-0.037462	0.200738	0.464541
1.537	-0.039135	0.20106	0.465641
1.53783	-0.040034	0.200886	0.466921
1.53867	-0.040045	0.201196	0.467216
1.5395	-0.04035	0.202001	0.466452
1.54033	-0.041251	0.201642	0.466253
1.54116	-0.040159	0.201111	0.466427
1.542	-0.040472	0.201099	0.466326
1.54283	-0.041959	0.200159	0.466122
1.54366	-0.042178	0.198562	0.465219
1.5445	-0.04153	0.197354	0.465572
1.54533	-0.041568	0.196637	0.466751
1.54616	-0.041076	0.196818	0.46651
1.54699	-0.041899	0.197565	0.46657
1.54783	-0.042348	0.197299	0.466983
1.54866	-0.043386	0.196804	0.467163
1.54949	-0.044101	0.197338	0.466937
1.55033	-0.043678	0.197886	0.466124
1.55116	-0.043409	0.198504	0.466486
1.55199	-0.043571	0.199108	0.467256
1.55282	-0.041431	0.199019	0.467226
1.55366	-0.040724	0.198638	0.4668
1.55449	-0.040848	0.199308	0.466651
1.55532	-0.040659	0.200926	0.466081
1.55616	-0.040292	0.201455	0.464567
1.55699	-0.039408	0.201434	0.462806
1.55782	-0.03921	0.201125	0.461452
1.55865	-0.039037	0.200949	0.46141
1.55949	-0.039623	0.201053	0.46182
1.56032	-0.040012	0.200036	0.46251
1.56115	-0.040829	0.199581	0.462682
1.56199	-0.041099	0.199651	0.463346
1.56282	-0.041112	0.199774	0.464727
1.56365	-0.041332	0.201003	0.465447
1.56448	-0.042337	0.202829	0.466222
1.56532	-0.043234	0.203537	0.465978
1.56615	-0.043512	0.203105	0.465259
1.56698	-0.044166	0.202989	0.465937
1.56782	-0.04373	0.202628	0.466651
1.56865	-0.043278	0.201958	0.466706
1.56948	-0.042454	0.201927	0.467093
1.57031	-0.042513	0.201586	0.468174
1.57115	-0.041859	0.201776	0.468663
1.57198	-0.042433	0.201923	0.468578
1.57281	-0.04182	0.201426	0.469685
1.57365	-0.043353	0.201045	0.471332
1.57448	-0.045402	0.201039	0.472217
1.57531	-0.044906	0.200267	0.472947
1.57614	-0.04436	0.198481	0.474152
1.57698	-0.044488	0.197225	0.475164
1.57781	-0.046083	0.196401	0.47684
1.57864	-0.045684	0.196273	0.478946
1.57948	-0.045908	0.195896	0.479647
1.58031	-0.044547	0.196535	0.47955
1.58114	-0.044085	0.198585	0.479193
1.58197	-0.043133	0.199253	0.479164
1.58281	-0.044589	0.199956	0.478922
1.58364	-0.044833	0.200829	0.478208
1.58447	-0.045824	0.200473	0.477574
1.58531	-0.045085	0.199826	0.477139
1.58614	-0.043795	0.200383	0.478092
1.58697	-0.043056	0.201422	0.479118
1.5878	-0.042221	0.20244	0.479577
1.58864	-0.040265	0.203458	0.479722
1.58947	-0.039106	0.204159	0.479656
1.5903	-0.039572	0.204238	0.47936
1.59114	-0.038533	0.204006	0.47858
1.59197	-0.038682	0.204456	0.478096
1.5928	-0.038725	0.204764	0.47837
1.59363	-0.038589	0.204502	0.47843
1.59447	-0.03886	0.204376	0.4777
1.5953	-0.038031	0.203999	0.477102
1.59613	-0.038425	0.204179	0.477013
1.59697	-0.039715	0.205603	0.477324
1.5978	-0.039955	0.206684	0.477527
1.59863	-0.039548	0.207493	0.476475
1.59946	-0.038394	0.20782	0.474618
1.6003	-0.037366	0.208846	0.474109
1.60113	-0.037768	0.209265	0.474703
1.60196	-0.03839	0.209278	0.476331
1.6028	-0.038913	0.209431	0.477615
1.60363	-0.038738	0.209677	0.477042
1.60446	-0.038908	0.210808	0.476565
1.6053	-0.039459	0.211906	0.477548
1.60613	-0.039956	0.213032	0.478796
1.60696	-0.039749	0.21381	0.478392
1.60779	-0.040431	0.213552	0.477562
1.60863	-0.041585	0.213013	0.4768
1.60946	-0.042955	0.21266	0.476463
1.61029	-0.043108	0.213097	0.47752
1.61113	-0.042304	0.213254	0.478564
1.61196	-0.043199	0.213319	0.478621
1.61279	-0.044001	0.212782	0.478308
1.61362	-0.044154	0.212709	0.478445
1.61446	-0.04506	0.215357	0.4789
1.61529	-0.04518	0.218205	0.479069
1.61612	-0.045363	0.220159	0.479971
1.61696	-0.045359	0.221176	0.480668
1.61779	-0.045637	0.220941	0.479797
1.61862	-0.046029	0.221244	0.479641
1.61945	-0.046165	0.221766	0.480112
1.62029	-0.047722	0.222315	0.480112
1.62112	-0.048338	0.223057	0.479907
1.62195	-0.04848	0.223242	0.479627
1.62279	-0.048569	0.222724	0.478677
1.62362	-0.047939	0.22265	0.477306
1.62445	-0.048099	0.222432	0.477515
1.62528	-0.048311	0.220986	0.478257
1.62612	-0.0478	0.219728	0.477965
1.62695	-0.048211	0.219683	0.477669
1.62778	-0.048579	0.219786	0.478481
1.62862	-0.047973	0.220476	0.479836
1.62945	-0.046574	0.22166	0.481139
1.63028	-0.046104	0.222653	0.482072
1.63111	-0.046274	0.223153	0.481804
1.63195	-0.046735	0.223298	0.481357
1.63278	-0.046205	0.223268	0.482394
1.63361	-0.04547	0.223185	0.484214
1.63445	-0.044502	0.222527	0.484776
1.63528	-0.043684	0.220573	0.484124
1.63611	-0.04263	0.219087	0.484518
1.63694	-0.041396	0.218271	0.485306
1.63778	-0.040815	0.217752	0.485834
1.63861	-0.039466	0.217305	0.486424
1.63944	-0.038871	0.216735	0.486474
1.64028	-0.039035	0.217208	0.487056
1.64111	-0.0394	0.217783	0.487966
1.64194	-0.039812	0.216332	0.488614
1.64277	-0.039157	0.21521	0.488575
1.64361	-0.038499	0.215533	0.489321
1.64444	-0.039156	0.21608	0.49124
1.64527	-0.039088	0.216974	0.492798
1.64611	-0.038831	0.217729	0.494123
1.64694	-0.039105	0.21801	0.495722
1.64777	-0.039192	0.216186	0.49729
1.6486	-0.040256	0.215297	0.49698
1.64944	-0.04075	0.215182	0.496308
1.65027	-0.041619	0.215075	0.496525
1.6511	-0.043192	0.215883	0.496485
1.65194	-0.044201	0.216072	0.4968
1.65277	-0.043926	0.215484	0.497271
1.6536	-0.044328	0.215526	0.498198
1.65443	-0.044636	0.215855	0.498888
1.65527	-0.044963	0.216871	0.499064
1.6561	-0.045626	0.217919	0.499112
1.65693	-0.046487	0.218251	0.500018
1.65777	-0.047788	0.219132	0.50012
1.6586	-0.048698	0.219823	0.499736
1.65943	-0.049888	0.21992	0.499673
1.66026	-0.050781	0.220703	0.499794
1.6611	-0.050755	0.220674	0.500544
1.66193	-0.049908	0.220631	0.502208
1.66276	-0.049179	0.221299	0.503749
1.6636	-0.04937	0.222146	0.504172
1.66443	-0.049847	0.222508	0.504522
1.66526	-0.049201	0.223071	0.504704
[truncated: 30,330 more rows]
