# Supplementary material for: A conserved cell division protein directly regulates FtsZ dynamics in filamentous and unicellular actinobacteria
Source: eLife. 2021 Mar 17;10:e63387. doi: 10.7554/eLife.63387 (PMC7968930; doi:10.7554/eLife.63387)
Supplement: Figure 7—source data 2. [file elife-63387-fig7-data2.xlsx]

## Sheet: Sheet1
Spore length measurements (biological triplicate experiments)
SS380 (mm)	SS380 (mm)	SS380 (mm)			Data of spore measurements for S. venezuelae WT and DsepH (SV56) is included in the Source Data for Figure 1-supplement 2
1.53451	1.08237	1.11357
1.32886	1.53343	1.41606
1.35727	1.44741	1.52003
1.29669	1.22314	1.26604
1.50937	1.70244	1.15454
1.51073	1.31908	1.06954
1.16519	1.23236	1.08577
1.38957	1.25857	1.20965
1.70983	1.20084	1.05029
1.32469	1.06463	1.13995
1.49211	1.45215	1.60413
1.49619	1.24418	1.6586
1.27218	1.42301	1.51626
1.61526	1.61274	1.07902
1.28879	1.26387	1.21009
1.67236	1.59375	1.2644
1.05419	1.41935	1.2462
1.34338	1.40945	1.24111
1.70049	1.11169	1.53797
1.32035	1.47457	1.5441
1.50787	1.58855	1.36667
1.2661	1.43625	1.33036
1.30082	1.30982	1.17965
1.55993	1.13721	1.10577
1.02059	1.08708	1.26956
1.36881	1.412	1.40659
1.36625	1.47871	1.24386
1.26757	1.54138	1.76079
1.37802	1.47396	1.51939
1.53038	1.41647	1.52392
1.2751	1.22989	1.64695
1.41892	1.29381	1.4919
1.42149	1.1062	1.39669
1.3282	1.16546	1.39682
1.62302	1.33418	1.21797
1.47906	1.29306	1.38519
1.36694	1.09795	1.03362
1.47163	1.49665	1.77362
1.2616	1.18691	1.32432
1.18199	1.21326	1.13657
1.0072	1.23465	1.34284
1.34082	1.1816	1.77817
1.44396	1.17937	1.3353
1.33025	1.20684	1.1261
1.31909	1.38342	1.05557
1.10487	1.2821	1.16249
1.33502	1.15665	1.73928
1.06804	1.08446	1.44785
1.76092	1.19536	1.10003
1.4071	1.52686	1.2657
1.51157	1.56985	1.39595
1.31976	1.15383	1.27826
1.58628	1.64897	1.52416
1.23795	1.10792	1.19151
1.39622	1.46726	1.26531
1.18115	1.44366	1.4715
1.51558	1.14647	1.38283
1.18458	1.15936	1.48446
1.09658	1.15421	1.33364
1.37139	1.39924	1.31752
1.14936	1.16245	1.44947
1.12399	1.30342	1.17511
1.5815	1.55383	1.04052
1.4218	1.2444	1.17039
1.62176	1.25376	1.23348
1.33527	1.14889	1.75806
1.41901	1.54714	1.07147
1.72957	1.23207	0.955358
1.29634	1.57902	1.2865
1.24181	1.07291	1.56879
1.23081	1.12717	1.15616
1.42611	1.23179	1.27576
1.18068	1.42935	1.49709
1.46545	1.42667	1.5146
1.31067	1.51836	1.46757
1.52791	1.74782	1.14956
1.32096	1.22857	1.37045
1.19886	1.37507	1.37017
1.25929	1.56981	1.14273
1.55373	1.31986	1.24442
1.30305	1.34979	1.66143
1.23117	1.09333	1.21236
1.3224	1.35291	1.27647
1.67488	1.15281	1.05364
1.34898	1.57714	1.36532
1.12648	1.20321	1.07399
1.29597	1.17684	1.60071
1.61509	1.77251	1.32188
1.11583	1.54099	1.54154
1.34456	1.64525	1.19903
1.22319	1.34976	1.09686
1.2053	1.42571	1.2795
1.51486	1.53262	1.37032
1.13359	0.997635	1.23921
1.40364	1.47387	1.18439
1.36012	1.31551	1.32718
1.22006	1.27684	1.59903
1.23637	1.07711	1.24893
1.25927	1.48861	1.20286
1.37045	1.36315	1.67419
1.4462	1.28157	1.10036
1.19355	1.24688	1.17845
1.65458	1.43164	1.01025
1.38901	1.76402	1.36313
1.32471	1.50613	1.25181
1.1272	1.31083	1.54266
1.27663	1.08972	1.76898
1.14207	1.4692	1.63723
1.64256	1.44092	1.60026
1.21866	1.18536	1.14204
1.33924	1.27008	1.23015
1.32137	1.16872	1.50235
1.28314	1.09679	1.57152
1.28972	1.5513	1.34862
1.43806	1.27494	1.21197
1.50796	1.2603	1.38043
1.49452	1.35298	1.65988
1.62937	1.67145	1.21736
1.08545	1.4336	1.58923
1.32913	1.68531	1.22667
1.08576	1.56837	1.2855
1.31937	1.78063	1.20552
1.37905	1.37182	1.12146
1.29467	1.18906	1.27174
1.23636	1.17675	1.37993
1.43862	1.47944	1.53788
1.27307	1.35986	1.33025
1.30083	1.36091	1.47502
1.28612	1.55003	1.53599
1.32318	1.21048	1.61975
1.09212	1.51466	1.17475
1.27771	1.27554	1.38901
1.38948	1.455	1.45373
1.43339	1.21077	1.35005
1.68497	1.26597	1.23081
1.38078	1.44448	1.06328
1.13046	1.58944	1.29351
1.32321	1.22235	1.23594
1.15799	1.77555	1.33273
1.31066	1.13777	1.10157
1.22934	1.44044	1.18348
1.69572	1.33399	1.29744
1.55948	1.48523	1.73786
1.40424	1.33029	1.10126
1.42123	1.26646	1.36842
1.28082	1.31698	1.79673
1.34523	1.43797	1.50138
1.10368	1.57705	1.13521
1.4486	1.13647	1.01395
1.02492	1.32959	1.44158
1.23566	1.48007	1.3437
1.47315	1.2162	1.60029
1.10185	1.17794	1.44295
1.29849	1.20412	1.21722
1.16791	1.44627	1.30255
1.30434	1.14107	1.62757
1.17855	1.4445	1.38826
1.66039	1.22535	1.10859
1.75532	1.36248	1.4771
1.10495	1.25665	1.45134
1.33178	1.20389	1.31629
1.74075	1.78771	1.12369
1.21413	1.27524	1.26621
1.17346	1.41192	1.11668
1.03755	1.33252	1.4705
0.960685	1.51637	1.08472
1.27366	1.48878	1.24334
1.38621	1.13444	1.45339
1.35877	1.24733	1.67653
1.07415	1.74225	1.76457
1.13971	1.18994	1.49239
1.15865	1.49637	1.43004
1.26571	1.13476	1.44435
1.12287	1.30592	1.20346
1.3397	1.0958	1.24137
1.26517	1.47691	1.5652
1.59359	1.29701	1.53902
1.30112	1.50283	1.18394
1.12143	1.73729	1.18788
1.21251	1.19287	1.20574
1.0762	1.47016	1.75182
1.29634	0.967907	1.41116
1.33387	1.35597	1.60122
1.4093	1.23553	1.06157
1.08341	1.06171	1.21526
1.07648	1.23728	1.12173
1.65347	1.45598	1.19214
1.48114	1.49459	1.13107
1.36597	1.75433	1.50478
1.18613	1.17671	1.10048
1.79623	1.33043	1.47872
1.0857	1.74091	1.61041
1.13984	1.11595	1.63426
1.19765	1.26331	1.46308
1.57889	1.44232	1.29123
1.67961	1.75096	1.17012
1.2436	1.2093	1.19488
1.35001	1.31131	1.28265
1.74789	1.70535	1.1495
1.58649	1.49111	1.10508
1.36744	1.18734	1.24308
1.39913	1.28636	1.05679
1.5265	1.19453	1.50445
1.63245	1.43085	1.17566
1.57808	1.50836	1.35355
1.39709	1.36589	1.50985
1.22277	1.42158	1.26829
1.31431	1.19801	1.47581
1.39559	1.46542	1.46194
1.44823	1.21345	1.03019
1.42528	1.0286	1.58874
1.21129	1.29573	1.5257
1.56414	1.67186	1.28984
1.52129	1.18971	1.55059
1.16447	1.31019	1.23427
1.16871	1.64267	1.19152
1.53465	1.25742	1.39938
1.68008	1.6128	1.49808
1.27954	1.36131	1.61658
1.40087	1.17083	1.53794
1.5577	1.42257	1.34877
1.49365	1.12682	1.31131
1.39939	1.73531	1.24078
1.42573	1.32109	1.15395
1.17136	1.04141	1.19549
1.44254	1.38884	1.3382
1.22957	1.15447	1.24084
1.08763	1.68685	1.20607
1.28883	1.72518	1.32299
1.41363	1.22791	1.17901
1.51272	1.28247	1.3352
1.34166	1.11064	1.31449
1.22078	1.15125	1.77511
1.13098	1.3164	1.42639
1.1835	1.07456	1.44905
1.40588	1.13747	1.22608
1.21968	1.76244	1.30377
1.2889	1.00267	1.1856
1.03549	1.42257	1.31342
1.68507	1.21103	1.31137
1.26971	1.33324	1.57128
1.18823	1.25134	1.48392
1.21348	1.34121	1.16302
1.56968	1.64133	1.14289
1.53775	1.35006	1.23728
1.23499	1.21734	1.63105
1.28728	1.50855	1.37136
1.43185	1.22538	1.66374
1.15631	1.47064	1.28451
1.44912	1.28955	1.26686
1.22825	1.05937	1.11506
1.18121	1.13684	1.14112
1.71629	1.01378	1.2421
1.72695	1.71403	1.4464
1.34843	1.38311	1.43088
1.72868	1.39262	1.14705
1.49622	1.47463	1.07159
1.3663	1.35214	1.56984
1.35094	1.28483	1.16057
1.46885	1.44087	1.3006
1.63268	1.40992	1.57514
1.3998	1.39212	1.25384
1.34518	1.42765	1.56354
1.21726	1.6121	1.51418
1.28372	1.35977	1.18294
1.46557	1.35705	1.55809
1.45118	1.31696	1.53789
1.78067	1.36558	1.54759
1.54599	1.50677	1.17776
1.14913	1.61796	1.14348
1.26136	1.17097	1.07959
1.22392	1.37246	1.71843
1.27117	1.41433	1.19237
1.57168	1.36143	1.18375
1.2006	1.33862	1.22637
1.24448	1.42566	1.24396
1.22911	1.42608	1.35292
1.5212	1.08638	1.24013
1.42152	1.08794	1.17856
1.31151	1.32133	1.18166
1.7409	1.72552	1.4519
1.24375	1.40301	1.54516
1.62905	1.60191	1.37417
1.1944	1.36043	1.4753
1.79469	1.26648	1.64508
1.29827	1.31316	1.04252
1.35814	1.31054	1.55447
1.4937	1.50271	1.02342
1.42945	1.24426	1.30825
1.05884	1.37273	1.04592
1.30471	1.58312	1.23536
1.32748	1.49576	1.38022
1.69175	1.28713	1.17603
1.21602	1.20283	1.23466
1.2568	1.21966	1.38382
1.5994	1.1553	1.60319
1.59382	1.4296	1.2572
1.30862	1.17111	1.17336
1.21085	1.40052	1.21033
1.54924	1.27777	1.41504
1.63131	1.57434	1.1398
1.25826	1.63387	1.51649
1.30087	1.40555	1.29447
1.02942	1.29761	1.47713
1.06978	1.28778	1.34166
1.49484	1.48119	1.20749
1.0807	1.24728	1.13508
1.3205	1.1808	1.219
1.25665	1.65004	1.63317
1.22948	1.51554	1.27237
1.41683	1.07574	1.12975
1.595	1.42358	1.43975
1.62108	1.3933	1.08805
1.27049	1.46105	1.49067
1.00404	1.52727	1.18209
1.2751	1.28387	1.15201
1.14711	1.10635	1.13955
1.78834	1.68443	1.20715
1.63007	1.2743	1.38563
1.32554	1.51939	1.18171
1.39371	1.2647	1.25405
1.29031	1.52617	1.38938
1.27709	1.16487	1.52456
1.04338	1.32577	1.33279
1.40436	1.00877	1.38204
1.35929	1.38772	1.37897
1.47519	1.17573	1.77594
1.23096	1.30952	1.3182
1.34523	1.39074	1.51485
1.3933	1.25547	1.10031
1.17579	1.64671	1.11034
1.61768	1.31051	1.54822
1.11778	1.23212	1.10214
1.17322	1.10729	1.30021
1.15028	1.72255	1.59963
1.15225	1.2217	1.79997
1.15093	1.57906	1.77129
1.27378	1.40285	1.1685
1.26196	1.41872	1.38901
1.20323	1.06126	1.21793
1.33775	1.36937	1.19606
1.37583	1.01082	1.47388
1.095	1.23555	1.35383
1.15952	1.44499	1.6519
1.50807	1.32768	1.25715
1.38152	1.45634	1.07806
1.3551	1.39954	1.47897
1.19496	1.19441	1.39722
1.05465	1.30324	1.20653
1.42099	1.29028	1.21324
